# Supplementary material for: The nexus between geographical distance and institutional delivery trends in Ethiopia: evidence from nationwide surveys
Source: PeerJ. 2024 Sep 20;12:e18128. doi: 10.7717/peerj.18128 (PMC11418825; doi:10.7717/peerj.18128)
Supplement: Supplemental Information 3 [file peerj-12-18128-s003.xlsx]

## Sheet: SSA MFL
Country	Admin1	Facility name	Facility type	Ownership	Lat	Long	LL source
Angola	Bengo	Hospital Barra Do Dande	Hospital	Govt.	-8.65598	13.4919	Google Earth
Angola	Bengo	Hospital Dos Dembos	Hospital	Govt.	-8.50255	14.5862	Google Earth
Angola	Bengo	Hospital Municipal de Ambriz	Municipal Hospital	Govt.	-7.8522	13.1307	Google Earth
Angola	Bengo	Hospital Municipal de Bula Atumba	Municipal Hospital	Govt.	-8.6742	14.7925	Google Earth
Angola	Bengo	Hospital Municipal de Dande	Municipal Hospital	Govt.	-8.58346	13.6569	Google Earth
Angola	Bengo	Hospital Municipal de Nambuangogo	Municipal Hospital	Govt.	-8.13277	14.2947	Google Earth
Angola	Bengo	Hospital Municipal de Pango Aluquem	Municipal Hospital	Govt.	-8.71313	14.4626	Google Earth
Angola	Bengo	Hospital Municipal de Quibaxe	Municipal Hospital	Govt.	-8.49956	14.5866	Google Earth
Angola	Bengo	Hospital Provincial de Bengo	Provincial Hospital	Govt.	-8.58244	13.6594	Google Earth
Angola	Benguela	27 de Marto Health Post	Posto de Saúde	MoH
Angola	Benguela	Abrigo Anjo da Guarda Health Centre	Centro de Saúde	MoH	-12.3507	13.5456	Combination
Angola	Benguela	Acude Health Post	Posto de Saúde	MoH	-12.4291	13.5415	Combination
Angola	Benguela	Alto Kapaca Health Post	Posto de Saúde	MoH	-12.9583	14.4234	Other
Angola	Benguela	Alto Liro Health Centre	Centro de Saúde	MoH	-11.9854	13.9792	Other
Angola	Benguela	Alto Niva Health Centre	Centro de Saúde	MoH
Angola	Benguela	Alto-Catumbela Health Centre	Centro de Saúde	MoH	-12.95	14.75	Other
Angola	Benguela	Asseque Health Centre	Centro de Saúde	MoH	-12.5964	13.4597	Other
Angola	Benguela	Atuque Health Post	Posto de Saúde	MoH	-12.9736	14.6581	Other
Angola	Benguela	Babaera Health Post	Posto de Saúde	MoH	-12.8953	14.8021	Other
Angola	Benguela	Baia Farta Centro Materno Infantil	Centro Materno Infantil	MoH	-12.607	13.1983	Combination
Angola	Benguela	Baia-Azul Health Post	Posto de Saúde	MoH	-12.6196	13.2466	Other
Angola	Benguela	Baia-Elefantes Health Post	Posto de Saúde	MoH	-13.2333	12.7259	Other
Angola	Benguela	Baia-Farta Municipal Hospital	Municipal Hospital	Govt.	-12.6082	13.2001	Other
Angola	Benguela	Bairro 80 Health Post	Posto de Saúde	MoH	-13.0358	14.2766	Combination
Angola	Benguela	Balanca Health Post	Posto de Saúde	MoH	-12.392	14.0901	Other
Angola	Benguela	Balombo Municipal Hospital	Municipal Hospital	Govt.	-12.3491	14.7701	Other
Angola	Benguela	Beato Laval (Missao Njinga) Health Centre	Centro de Saúde	MoH	-12.6117	13.1957	Combination
Angola	Benguela	Bela Vista Baixa Health Post	Posto de Saúde	MoH
Angola	Benguela	Bela Vista Health Post	Posto de Saúde	MoH	-12.5786	13.4025	Other
Angola	Benguela	Bela Vistal Centro Materno Infantil	Centro de Saúde	MoH	-12.3687	13.5746	Other
Angola	Benguela	Benfica Health Post	Posto de Saúde	MoH	-12.5688	13.4081	Other
Angola	Benguela	Benguela 70 Hospital	Hospital	Govt.	-12.6235	13.2321	Google Earth
Angola	Benguela	Benguela 71 Health Post	Posto de Saúde	MoH	-12.5861	13.3902	Google Earth
Angola	Benguela	Benguela Centro Materno Infantil	Centro Materno Infantil	MoH	-12.5803	13.4078	Other
Angola	Benguela	Benguela Provincial Hospital	Provincial Hospital	Govt.	-12.5732	13.4007	Google Earth
Angola	Benguela	Benguela/Lobito Hospital	Central Hospital	Govt.	-12.35	13.55	Other
Angola	Benguela	Bimbas Health Post	Posto de Saúde	MoH	-12.6661	13.5087	Other
Angola	Benguela	Biopio Health Post	Posto de Saúde	MoH	-12.467	13.733	Encarta
Angola	Benguela	Boa Lembranta Health Post	Posto de Saúde	MoH	-12.9404	12.981	Other
Angola	Benguela	Bocoio Missao Catolica Health Post	Posto de Saúde	MoH	-12.4704	14.1405	Combination
Angola	Benguela	Bocoio Municipal Hospital	Municipal Hospital	Govt.	-12.4961	14.1361	Other
Angola	Benguela	Bolonguera Health Post	Posto de Saúde	MoH	-13.55	13.5833	Other
Angola	Benguela	Bumbua Health Post	Posto de Saúde	MoH	-12.9701	14.135	Other
Angola	Benguela	Bunjei Health Post	Posto de Saúde	MoH	-13.5825	13.9431	Combination
Angola	Benguela	Cachimano Health Post	Posto de Saúde	MoH	-13.0216	14.0027	Combination
Angola	Benguela	Cachimbumba Health Post	Posto de Saúde	MoH	-12.625	13.2373	Combination
Angola	Benguela	Cacula Health Post	Posto de Saúde	MoH	-11.9639	13.7861	Other
Angola	Benguela	Caimbambo Missao Catolica Health Post	Posto de Saúde	MoH	-13.0258	14.0018	Google Earth
Angola	Benguela	Caimbambo Municipal Hospital	Municipal Hospital	Govt.	-13.017	14	Other
Angola	Benguela	Cainde Health Post	Posto de Saúde	MoH	-13.2563	14.5106	Other
Angola	Benguela	Calei Health Post	Posto de Saúde	MoH	-13.0262	14.0013	Other
Angola	Benguela	Calomburaco Health Post	Posto de Saúde	MoH	-12.6068	13.3777	Other
Angola	Benguela	Calombwe Health Centre	Centro de Saúde	MoH	-12.5984	13.3935	Encarta
Angola	Benguela	Calondjindjo Health Post	Posto de Saúde	MoH	-13.0312	14.6439	Combination
Angola	Benguela	Calondo Health Post	Posto de Saúde	MoH	-13.031	14.0059	Combination
Angola	Benguela	Calossombekwa Health Centre	Centro de Saúde	MoH	-12.6116	13.4318	Other
Angola	Benguela	Calundo Health Post	Posto de Saúde	MoH	-12.7833	14.5833	Other
Angola	Benguela	Cambanda Health Centre	Centro de Saúde	MoH	-12.5913	13.4107	Other
Angola	Benguela	Cambangela Health Post	Posto de Saúde	MoH	-12.5742	13.4522	Other
Angola	Benguela	Camuine Health Post	Posto de Saúde	MoH
Angola	Benguela	Camuine-Baixo Health Post	Posto de Saúde	MoH	-13.8209	14.2066	Other
Angola	Benguela	Camunda Health Centre	Centro de Saúde	MoH	-12.5934	13.4144	Other
Angola	Benguela	Cangoia Health Post	Posto de Saúde	MoH	-12.5703	14.2332	Other
Angola	Benguela	Canguengo Health Post	Posto de Saúde	MoH	-12.8966	13.1226	Other
Angola	Benguela	Canhamela Health Post	Posto de Saúde	MoH	-13.0328	14.0174	Combination
Angola	Benguela	Canjala Health Centre	Centro de Saúde	MoH	-11.9714	13.9939	Other
Angola	Benguela	Canjola Health Post	Posto de Saúde	MoH	-13.0653	14.8007	Other
Angola	Benguela	Caota Health Post	Posto de Saúde	MoH	-12.5993	13.4111	Other
Angola	Benguela	Capilongo Health Post	Posto de Saúde	MoH	-12.6242	13.6809	Other
Angola	Benguela	Cassai Health Post	Posto de Saúde	MoH	-12.3825	13.5963	Combination
Angola	Benguela	Casseque Health Post	Posto de Saúde	MoH	-13.3202	14.7256	Other
Angola	Benguela	Cassima Vivo Health Post	Posto de Saúde	MoH	-13.0259	14.0016	Google Earth
Angola	Benguela	Cassiva Health Post	Posto de Saúde	MoH	-13.0866	14.2898	Other
Angola	Benguela	Catanda Health Post	Posto de Saúde	MoH	-12.7	14.6667	Other
Angola	Benguela	Catchimbango Health Post	Posto de Saúde	MoH	-12.9679	14.5297	Combination
Angola	Benguela	Catengue Health Post	Posto de Saúde	MoH	-13.0333	13.75	Other
Angola	Benguela	Catumbela Municipal Hospital	Municipal Hospital	Govt.	-12.4317	13.5457	Google Earth
Angola	Benguela	Caundy Health Post	Posto de Saúde	MoH	-12.4371	13.5295	Combination
Angola	Benguela	Cavimbi2 Health Post	Posto de Saúde	MoH	-12.2014	14.3317	Other
Angola	Benguela	Cavindgiliti Health Post	Posto de Saúde	MoH
Angola	Benguela	Cawango Health Post	Posto de Saúde	MoH	-12.5465	13.4318	Other
Angola	Benguela	Chacuma Health Post	Posto de Saúde	MoH	-12.8668	14.7884	Other
Angola	Benguela	Chamume Health Centre	Centro de Saúde	MoH	-12.7167	13.1	Other
Angola	Benguela	Chicandula Health Post	Posto de Saúde	MoH
Angola	Benguela	Chico da Waity Health Post	Posto de Saúde	MoH	-12.2793	14.8161	Other
Angola	Benguela	Chila Health Centre	Centro de Saúde	MoH	-12.066	14.4861	Other
Angola	Benguela	Chimbambo Health Post	Posto de Saúde	MoH
Angola	Benguela	Chimbassi Health Post	Posto de Saúde	MoH	-13.1833	14.2	Other
Angola	Benguela	Chimboa Health Post	Posto de Saúde	MoH	-12.9667	14.4667	Other
Angola	Benguela	Chindumbo Health Centre	Centro de Saúde	MoH	-12.956	13.1085	Other
Angola	Benguela	Chinduri Health Post	Posto de Saúde	MoH	-12.5905	14.2169	Other
Angola	Benguela	Chingongo Health Post	Posto de Saúde	MoH	-12.3167	14.5167	Other
Angola	Benguela	Chivole Health Post	Posto de Saúde	MoH
Angola	Benguela	Cho Mujombue Health Post	Posto de Saúde	MoH	-13.5855	13.941	Other
Angola	Benguela	Chongoroi Municipal Hospital	Municipal Hospital	Govt.	-13.5733	13.9407	Other
Angola	Benguela	Chongoroil Centro Materno Infantil	Centro de Saúde	MoH	-13.567	13.95	Other
Angola	Benguela	Cotel Health Post	Posto de Saúde	MoH	-12.5493	13.4229	Combination
Angola	Benguela	Cubal Municipal Hospital	Municipal Hospital	Govt.	-13.0321	14.2531	Other
Angola	Benguela	Cuball Centro Materno Infantil	Centro de Saúde	MoH	-13.0333	14.25	Other
Angola	Benguela	Cuca Health Post	Posto de Saúde	MoH	-12.4637	13.521	Combination
Angola	Benguela	Cui Povoacao Health Post	Posto de Saúde	MoH
Angola	Benguela	Culango Health Post	Posto de Saúde	MoH	-12.3	13.85	Other
Angola	Benguela	Cutembo Health Post	Posto de Saúde	MoH	-13.8154	13.9702	Other
Angola	Benguela	Damba Maria Health Post	Posto de Saúde	MoH	-12.5265	13.4623	Other
Angola	Benguela	Dembue Health Post	Posto de Saúde	MoH	-13.0645	14.5911	Other
Angola	Benguela	Dombe Grande Communal Hospital	Municipal Hospital	Govt.	-12.9447	13.0978	Other
Angola	Benguela	Dumbo Oliveira Health Post	Posto de Saúde	MoH	-12.9358	14.6325	Other
Angola	Benguela	Ebanga Health Centre	Centro de Saúde	MoH	-12.73	14.73	Other
Angola	Benguela	Egipto Praia Health Post	Posto de Saúde	MoH	-11.9611	13.7664	Other
Angola	Benguela	Elongo Health Post	Posto de Saúde	MoH	-12.3437	14.9574	Other
Angola	Benguela	Epembe Health Post	Posto de Saúde	MoH	-12.4712	14.141	Combination
Angola	Benguela	Equimina Health Centre	Centro de Saúde	MoH	-13.2	12.8	Other
Angola	Benguela	Eyendue Health Post	Posto de Saúde	MoH	-13.0311	14.0129	Combination
Angola	Benguela	Fasil Health Post	Posto de Saúde	MoH	-12.4622	14.1303	Combination
Angola	Benguela	Fonte das Gracas Health Post	Posto de Saúde	MoH	-12.3664	13.5782	Google Earth
Angola	Benguela	Fronteira Health Centre	Centro de Saúde	MoH	-12.5947	13.4222	Other
Angola	Benguela	Gama Health Post	Posto de Saúde	MoH	-12.5074	13.4975	Other
Angola	Benguela	Ganda Municipal Hospital	Municipal Hospital	Govt.	-13.0161	14.6361	Other
Angola	Benguela	Gaspar Lopes Health Centre	Centro de Saúde	MoH
Angola	Benguela	Gato Health Post	Posto de Saúde	MoH
Angola	Benguela	Grata Centro Materno Infantil	Centro Materno Infantil	MoH	-12.5604	13.4392	Combination
Angola	Benguela	Hanha do Norte Health Post	Posto de Saúde	MoH	-12.2437	13.7162	Other
Angola	Benguela	Hanja Primaria Health Post	Posto de Saúde	MoH	-13.699	13.882	Encarta
Angola	Benguela	Hungulo Health Post	Posto de Saúde	MoH	-12.3291	14.888	Other
Angola	Benguela	Igreja EvangTlica Sinodal de Angola (IESA) Health Centre	Centro de Saúde	MoH
Angola	Benguela	Joaquim Kapango Health Post	Posto de Saúde	MoH	-12.5852	13.4138	Combination
Angola	Benguela	Kafindua Health Post	Posto de Saúde	MoH	-12.3497	14.7683	Combination
Angola	Benguela	Kalahanga Health Centre	Centro de Saúde	MoH	-13.2219	13.4914	Other
Angola	Benguela	Kaliamuma Health Post	Posto de Saúde	MoH	-12.8	14.15	Other
Angola	Benguela	Kambondogolo Health Post	Posto de Saúde	MoH	-13.35	14.4	Other
Angola	Benguela	Kanbandjo Health Post	Posto de Saúde	MoH	-12.3524	14.7698	Google Earth
Angola	Benguela	Kandioguilo Health Post	Posto de Saúde	MoH
Angola	Benguela	Kanokela Health Post	Posto de Saúde	MoH	-12.3389	14.7677	Google Earth
Angola	Benguela	Kaponte Pequena Health Post	Posto de Saúde	MoH	-12.5736	13.4312	Encarta
Angola	Benguela	Kapupa Health Centre	Centro de Saúde	MoH
Angola	Benguela	Kassanje CTE Health Post	Posto de Saúde	MoH	-12.6157	13.1863	Other
Angola	Benguela	Kateke Health Post	Posto de Saúde	MoH	-12.4671	14.1262	Other
Angola	Benguela	Katima Health Post	Posto de Saúde	MoH	-13.0547	14.6015	Other
Angola	Benguela	Kayave Health Post	Posto de Saúde	MoH	-12.783	13.949	Encarta
Angola	Benguela	Kuyo Health Post	Posto de Saúde	MoH	-12.983	12.983	Encarta
Angola	Benguela	Lembi-Lembi Health Post	Posto de Saúde	MoH
Angola	Benguela	Lomboloque Health Centre	Centro de Saúde	MoH
Angola	Benguela	Lometi Health Post	Posto de Saúde	MoH	-12.376	14.5616	Other
Angola	Benguela	Lomia Health Post	Posto de Saúde	MoH	-13.194	14.1086	Other
Angola	Benguela	Lomumu Health Post	Posto de Saúde	MoH	-12.8643	14.5571	Other
Angola	Benguela	Lossala Health Post	Posto de Saúde	MoH	-12.9722	13.9879	Other
Angola	Benguela	Lossinja Health Post	Posto de Saúde	MoH	-12.4776	13.9441	Other
Angola	Benguela	Luacho Health Post	Posto de Saúde	MoH	-12.8918	13.0001	Other
Angola	Benguela	Lulambo Health Post	Posto de Saúde	MoH
Angola	Benguela	Lulandi Health Post	Posto de Saúde	MoH
Angola	Benguela	Lumaun Health Post	Posto de Saúde	MoH	-12.7259	14.3863	Other
Angola	Benguela	Lumbili Health Post	Posto de Saúde	MoH	-13.581	13.9426	Combination
Angola	Benguela	Lumbo Health Centre	Centro de Saúde	MoH	-12.6323	13.4235	Other
Angola	Benguela	Luoluo Health Post	Posto de Saúde	MoH	-12.4499	13.6095	Other
Angola	Benguela	Luongo Health Post	Posto de Saúde	MoH	-12.459	13.5497	Combination
Angola	Benguela	Lussipa Health Post	Posto de Saúde	MoH	-13.0232	14.6359	Combination
Angola	Benguela	Macaca Health Post	Posto de Saúde	MoH	-12.6108	13.1968	Other
Angola	Benguela	Mahumbulu Health Post	Posto de Saúde	MoH	-13.0284	13.9941	Combination
Angola	Benguela	Maka Mombolo Health Centre	Centro de Saúde	MoH	-12.628	13.201	Encarta
Angola	Benguela	Malongo Missao Health Post	Posto de Saúde	MoH	-13.4608	14.1087	Other
Angola	Benguela	Malowe Health Post	Posto de Saúde	MoH	-13.0801	13.9804	Other
Angola	Benguela	Mange Health Post	Posto de Saúde	MoH	-12.3167	14.1167	Other
Angola	Benguela	Marco Canavez Health Post	Posto de Saúde	MoH	-13.041	14.2442	Other
Angola	Benguela	Massangarala Health Centre	Centro de Saúde	MoH	-12.5845	13.4054	Combination
Angola	Benguela	M'Bambi Health Centre	Centro de Saúde	MoH	-13.0236	14.0019	Other
Angola	Benguela	Mina Health Post	Posto de Saúde	MoH	-12.6114	13.5203	Other
Angola	Benguela	Missao Catolica Health Centre	Centro de Saúde	MoH	-13.0236	14.0082	Combination
Angola	Benguela	Missao Dunde Health Post	Posto de Saúde	MoH	-12.8835	14.5847	Other
Angola	Benguela	Missao Kapusso Health Post	Posto de Saúde	MoH	-12.6964	14.4752	Other
Angola	Benguela	Monte Belo Health Centre	Centro de Saúde	MoH	-12.418	14.3949	Other
Angola	Benguela	Muhaningo Health Post	Posto de Saúde	MoH	-12.6123	13.1965	Combination
Angola	Benguela	Mulumba Health Centre	Centro de Saúde	MoH
Angola	Benguela	Munguavolo Health Post	Posto de Saúde	MoH
Angola	Benguela	Navegantes Health Post	Posto de Saúde	MoH	-12.5309	13.4548	Combination
Angola	Benguela	Ndende Health Post	Posto de Saúde	MoH	-12.9482	14.4515	Other
Angola	Benguela	Ndoloma Health Post	Posto de Saúde	MoH	-12.6284	13.2027	Other
Angola	Benguela	Ngoma Health Post	Posto de Saúde	MoH	-13.1208	14.0996	Other
Angola	Benguela	Ningui-Ningui Health Post	Posto de Saúde	MoH	-13.3243	13.8267	Other
Angola	Benguela	Nossa Senhora da Paz Hospital	Hospital	Govt.	-13.0404	14.2363	Google Earth
Angola	Benguela	Nzagi Career and Technical Education Health Post	Posto de Saúde	MoH	-12.3952	13.5557	Google Earth
Angola	Benguela	Paroquia Health Post	Posto de Saúde	MoH
Angola	Benguela	Passe Health Post	Posto de Saúde	MoH	-12.5667	13.9667	Other
Angola	Benguela	Posto Bom Pastor	Posto de Saúde	MoH	-12.3867	13.5917	Combination
Angola	Benguela	Praia Bebe Health Centre	Centro de Saúde	MoH	-13.1264	13.7693	Other
Angola	Benguela	Pupira Health Post	Posto de Saúde	MoH	-12.9268	13.9484	Other
Angola	Benguela	Quisquerof Health Post	Posto de Saúde	MoH	-13.0359	14.2328	Combination
Angola	Benguela	Rio Bom Health Post	Posto de Saúde	MoH	-13.0683	14.2709	Other
Angola	Benguela	S.S. Luanga Health Centre	Centro de Saúde	MoH
Angola	Benguela	Saco Health Post	Posto de Saúde	MoH	-12.8238	12.9732	Other
Angola	Benguela	Santa Cruz Health Post	Posto de Saúde	MoH	-12.3979	13.553	Other
Angola	Benguela	Santa Maria Health Post	Posto de Saúde	MoH	-13.0239	14.6357	Combination
Angola	Benguela	Santo Antonio Health Post	Posto de Saúde	MoH	-12.6083	13.3217	Other
Angola	Benguela	Sao Joao Health Centre	Centro de Saúde	MoH	-12.5	13.51	Other
Angola	Benguela	Sao Jose Health Post	Posto de Saúde	MoH	-12.6134	13.1858	Combination
Angola	Benguela	Sao Martinho de Lima Health Centre	Centro de Saúde	MoH	-12.3657	13.5599	Combination
Angola	Benguela	Sao Pedro de Calabria Health Post	Posto de Saúde	MoH	-12.4195	13.7794	Combination
Angola	Benguela	Sendje Health Post	Posto de Saúde	MoH	-13.5957	13.8303	Google Earth
Angola	Benguela	Sendje Health Post	Posto de Saúde	MoH	-12.6125	13.1859	Other
Angola	Benguela	Sibol Health Post	Posto de Saúde	MoH	-12.4474	14.1381	Combination
Angola	Benguela	Taka Health Post	Posto de Saúde	MoH	-12.5375	13.4761	Other
Angola	Benguela	Tata Health Centre	Centro de Saúde	MoH	-13.0277	14.0089	Other
Angola	Benguela	Tchicuma Health Centre	Centro de Saúde	MoH
Angola	Benguela	Tchinhungo Health Post	Posto de Saúde	MoH	-13.1758	13.9458	Other
Angola	Benguela	Tchitoko Health Post	Posto de Saúde	MoH	-13.7057	13.962	Other
Angola	Benguela	Tenda-Moco Health Post	Posto de Saúde	MoH	-12.63	14.5	Other
Angola	Benguela	Tola Health Centre	Centro de Saúde	MoH	-12.5464	14.3904	Other
Angola	Benguela	Tumbulo Health Post	Posto de Saúde	MoH	-12.8667	14.1333	Other
Angola	Benguela	Uchi Health Post	Posto de Saúde	MoH	-12.7225	13.3561	Other
Angola	Benguela	Uenge Health Post	Posto de Saúde	MoH	-12.7012	13.1104	Combination
Angola	Benguela	Ukende Health Post	Posto de Saúde	MoH	-12.5932	13.4242	Combination
Angola	Benguela	Undongo Health Post	Posto de Saúde	MoH
Angola	Benguela	Utomba Health Post	Posto de Saúde	MoH	-12.586	13.2657	Combination
Angola	Benguela	Vaiva Health Post	Posto de Saúde	MoH
Angola	Benguela	Vianja Health Post	Posto de Saúde	MoH
Angola	Benguela	Vimala-Passo Health Centre	Centro de Saúde	MoH	-12.8505	13.0643	Other
Angola	Benguela	Vimbalambi Health Post	Posto de Saúde	MoH	-12.52	13.5	Other
Angola	Benguela	Vinama Health Post	Posto de Saúde	MoH	-13.5775	13.9395	Combination
Angola	Benguela	Wiyangombe Health Post	Posto de Saúde	MoH	-13.0368	14.1155	Other
Angola	Benguela	Yambala Health Centre	Centro de Saúde	MoH
Angola	Bie	Hospital Municipal de Andulo	Municipal Hospital	Govt.	-11.4847	16.6932	Google Earth
Angola	Bie	Hospital Municipal de Chinguar	Municipal Hospital	Govt.	-12.5575	16.3379	Google Earth
Angola	Bie	Hospital Municipal de Chitembo	Municipal Hospital	Govt.	-13.5082	16.7572	Google Earth
Angola	Bie	Hospital Municipal de Kamacupa	Municipal Hospital	Govt.	-12.025	17.4773	Google Earth
Angola	Bie	Hospital Municipal de Katabola	Municipal Hospital	Govt.	-12.1415	17.2813	Google Earth
Angola	Bie	Hospital Municipal de Kuito	Municipal Hospital	Govt.	-12.3894	16.9201	Google Earth
Angola	Bie	Hospital Municipal de Kunhinga	Municipal Hospital	Govt.	-12.2355	16.7821	Google Earth
Angola	Bie	Hospital Municipal de Nharea	Municipal Hospital	Govt.	-11.4701	16.9649	Google Earth
Angola	Bie	Hospital Provincial de Bie	Provincial Hospital	Govt.	-12.3906	16.9383	Google Earth
Angola	Cabinda	Hospital Municipal de Belize	Municipal Hospital	Govt.	-4.64108	12.7613	Google Earth
Angola	Cabinda	Hospital Municipal de Bucu-Zau	Municipal Hospital	Govt.	-4.75722	12.5387	Google Earth
Angola	Cabinda	Hospital Municipal de Cabinda	Municipal Hospital	Govt.	-5.56013	12.1967	Google Earth
Angola	Cabinda	Hospital Municipal de Cacongo	Municipal Hospital	Govt.	-5.23678	12.1456	Google Earth
Angola	Cabinda	Hospital Provincial de Cabinda	Provincial Hospital	Govt.	-5.57106	12.1959	Google Earth
Angola	Cuanza Norte	Aldeia-Nova Health Post	Posto de Saúde	MoH	-9.21668	14.2455	Other
Angola	Cuanza Norte	Aldeia-Nova Health Post	Posto de Saúde	MoH	-8.17817	15.3776	Other
Angola	Cuanza Norte	Alto Fina Health Post	Posto de Saúde	MoH
Angola	Cuanza Norte	Ambaca Municipal Hospital	Municipal Hospital	Govt.	-8.1833	15.3667	Combination
Angola	Cuanza Norte	Banga Health Centre	Centro de Saúde	MoH	-8.7311	15.1703	Other
Angola	Cuanza Norte	Bango Health Post	Posto de Saúde	MoH	-8.30675	15.2794	Other
Angola	Cuanza Norte	Banza de Banze Health Post	Posto de Saúde	MoH	-9.5699	14.8295	Other
Angola	Cuanza Norte	Bengueji Health Post	Posto de Saúde	MoH	-9.07727	15.252	Combination
Angola	Cuanza Norte	Bessenguele Health Post	Posto de Saúde	MoH	-8.65	14.98	Other
Angola	Cuanza Norte	Bindo Sector Health Post	Posto de Saúde	MoH	-8.15	15.2167	Other
Angola	Cuanza Norte	Bolongongo Health Centre	Centro de Saúde	MoH	-8.46571	15.253	Other
Angola	Cuanza Norte	Bonzo Health Post	Posto de Saúde	MoH	-8.56541	15.2723	Other
Angola	Cuanza Norte	Bungo Health Post	Posto de Saúde	MoH	-9.69018	14.6705	Other
Angola	Cuanza Norte	Cabinda Health Post	Posto de Saúde	MoH	-9.15	14.95	Other
Angola	Cuanza Norte	Caboco Health Post	Posto de Saúde	MoH	-8.5299	15.0611	Other
Angola	Cuanza Norte	Caculo-Cabata Health Post	Posto de Saúde	MoH	-8.30704	15.3584	Other
Angola	Cuanza Norte	Cafuta Health Post	Posto de Saúde	MoH	-8.97052	14.9598	Other
Angola	Cuanza Norte	Camame Health Centre	Centro de Saúde	MoH	-8.98333	14.9833	Other
Angola	Cuanza Norte	Camame Health Post	Posto de Saúde	MoH	-8.98665	14.994	Other
Angola	Cuanza Norte	Cambambe Municipal Health Centre	Centro de Saúde	MoH	-9.75	14.5	Other
Angola	Cuanza Norte	Cambambe Municipal Hospital	Municipal Hospital	Govt.	-9.68901	14.424	Other
Angola	Cuanza Norte	Cambondo Health Centre	Centro de Saúde	MoH	-9.16667	14.6667	Other
Angola	Cuanza Norte	Cana Canjungo Health Post	Posto de Saúde	MoH	-8.16604	15.282	Other
Angola	Cuanza Norte	Canguenhe Health Post	Posto de Saúde	MoH	-9.5303	14.3156	Other
Angola	Cuanza Norte	Canguimbi Health Post	Posto de Saúde	MoH	-8.2359	15.2534	Other
Angola	Cuanza Norte	Canhoca Health Post	Posto de Saúde	MoH	-9.12992	14.8529	Other
Angola	Cuanza Norte	Canzondo Health Post	Posto de Saúde	MoH	-9.23333	15.05	Other
Angola	Cuanza Norte	Cariamba Health Post	Posto de Saúde	MoH	-8.6	15.2	Other
Angola	Cuanza Norte	Carianga Health Post	Posto de Saúde	MoH	-9.29098	14.9915	Other
Angola	Cuanza Norte	Cassoalala Health Post	Posto de Saúde	MoH	-9.48333	14.35	Other
Angola	Cuanza Norte	Catamba Health Post	Posto de Saúde	MoH	-9.3	14.7667	Other
Angola	Cuanza Norte	Catari II Health Post	Posto de Saúde	MoH	-9.3369	14.9823	Other
Angola	Cuanza Norte	Catome de Cima Health Post	Posto de Saúde	MoH	-9.29711	14.9375	Other
Angola	Cuanza Norte	Cavunga Health Post	Posto de Saúde	MoH	-8.92005	14.6641	Other
Angola	Cuanza Norte	Caxissa Health Post	Posto de Saúde	MoH	-9.51135	14.6863	Other
Angola	Cuanza Norte	Cazengo Centro Materno Infantil	Centro Materno Infantil	MoH	-9.30478	14.8997	Other
Angola	Cuanza Norte	Cazengo Municipal Hospital	Municipal Hospital	Govt.	-9.30151	14.9156	Google Earth
Angola	Cuanza Norte	Cazombo Health Post	Posto de Saúde	MoH	-8.73333	15.3667	Other
Angola	Cuanza Norte	Cazua Health Post	Posto de Saúde	MoH	-8.00193	15.25	Other
Angola	Cuanza Norte	Cerca Health Post	Posto de Saúde	MoH	-9.067	14.567	Other
Angola	Cuanza Norte	Coio Health Post	Posto de Saúde	MoH	-9.02723	15.2828	Other
Angola	Cuanza Norte	Cole Health Post	Posto de Saúde	MoH	-8.07306	15.2684	Other
Angola	Cuanza Norte	Cupoe Health Post	Posto de Saúde	MoH	-9.30548	14.901	Combination
Angola	Cuanza Norte	Dange-Ya-Menha Health Post	Posto de Saúde	MoH	-9.533	14.667	Other
Angola	Cuanza Norte	Dr Agostinho Neto Provincial Hospital	Provincial Hospital	Govt.	-9.30175	14.913	Google Earth
Angola	Cuanza Norte	Dualumbi Health Post	Posto de Saúde	MoH	-9.11369	15.2338	Other
Angola	Cuanza Norte	G-Alto Municipal Hospital	Municipal Hospital	Govt.	-9.13333	14.7667	Other
Angola	Cuanza Norte	Golome Health Post	Posto de Saúde	MoH	-9.73029	14.5131	Other
Angola	Cuanza Norte	Gonguembo Municipal Hospital	Municipal Hospital	Govt.	-8.98333	14.9333	Other
Angola	Cuanza Norte	Hala Health Post	Posto de Saúde	MoH	-9.20858	15.2411	Combination
Angola	Cuanza Norte	Hanga Health Post	Posto de Saúde	MoH	-8.41667	15.7167	Other
Angola	Cuanza Norte	Helegi Health Post	Posto de Saúde	MoH	-9.27042	15.1507	Combination
Angola	Cuanza Norte	Hombo Health Post	Posto de Saúde	MoH	-9.6684	14.6306	Other
Angola	Cuanza Norte	Kafuma Health Post	Posto de Saúde	MoH	-9.6776	14.4278	Other
Angola	Cuanza Norte	Kahima Health Post	Posto de Saúde	MoH	-8.468	15.6077	Combination
Angola	Cuanza Norte	Kandange Health Post	Posto de Saúde	MoH	-9.74256	14.4908	Combination
Angola	Cuanza Norte	Kapata Health Post	Posto de Saúde	MoH	-8.43892	15.3671	Other
Angola	Cuanza Norte	Kianvo Health Post	Posto de Saúde	MoH	-8.59882	15.3538	Other
Angola	Cuanza Norte	Kiboto Health Post	Posto de Saúde	MoH	-8.461	15.251	Encarta
Angola	Cuanza Norte	Kigia Health Post	Posto de Saúde	MoH	-9.27052	15.2506	Google Earth
Angola	Cuanza Norte	Kilemba Sector do Cuso Health Post	Posto de Saúde	MoH	-8.94909	15.3301	Other
Angola	Cuanza Norte	Kilombo Kiaputo Health Post	Posto de Saúde	MoH	-8.90883	14.7276	Other
Angola	Cuanza Norte	Kilometro 13 Health Post	Posto de Saúde	MoH	-9.25548	15.0078	Other
Angola	Cuanza Norte	Kipata Health Post	Posto de Saúde	MoH	-9.29124	14.9204	Other
Angola	Cuanza Norte	Kiquiemba Health Post	Posto de Saúde	MoH	-8.33618	14.912	Other
Angola	Cuanza Norte	Kixina Kiatuco Health Post	Posto de Saúde	MoH
Angola	Cuanza Norte	Longa Health Post	Posto de Saúde	MoH	-8.28333	15.6333	Other
Angola	Cuanza Norte	Lucala Centro Sanaterio	Centro Sanatorio Materno Infantil	MoH	-9.26517	15.2422	Combination
Angola	Cuanza Norte	Lucala II Health Post	Posto de Saúde	MoH	-9.29911	14.9302	Other
Angola	Cuanza Norte	Lucala Municipal Hospital	Municipal Hospital	Govt.	-9.26631	15.2407	Other
Angola	Cuanza Norte	Luinga Health Post	Posto de Saúde	MoH	-8.467	15.6	Other
Angola	Cuanza Norte	Maculumbi Health Post	Posto de Saúde	MoH
Angola	Cuanza Norte	Malesso Health Post	Posto de Saúde	MoH	-9.1373	14.8436	Other
Angola	Cuanza Norte	Manguengue Health Post	Posto de Saúde	MoH	-8.33945	15.2184	Other
Angola	Cuanza Norte	Massangano Health Post	Posto de Saúde	MoH	-9.61667	14.2667	Other
Angola	Cuanza Norte	Maua Health Post	Posto de Saúde	MoH	-8.28008	15.3156	Other
Angola	Cuanza Norte	Mucoso Health Centre	Centro de Saúde	MoH	-9.53792	14.6608	Other
Angola	Cuanza Norte	Mululo Health Post	Posto de Saúde	MoH	-9.08892	14.8321	Other
Angola	Cuanza Norte	Mussusso Health Post	Posto de Saúde	MoH	-8.86754	15.104	Other
Angola	Cuanza Norte	Pedro Quilemba Health Post	Posto de Saúde	MoH	-9.683	14.8	Other
Angola	Cuanza Norte	Pimbi Health Post	Posto de Saúde	MoH	-8.41698	15.1825	Other
Angola	Cuanza Norte	Posto de Saúde da Kalemba	Posto de Saúde	MoH
Angola	Cuanza Norte	Povo Longe Health Post	Posto de Saúde	MoH	-7.99408	15.3985	Other
Angola	Cuanza Norte	Quibanda Health Post	Posto de Saúde	MoH	-8.5561	15.3365	Other
Angola	Cuanza Norte	Quiculungo Municipal Hospital	Municipal Hospital	Govt.	-8.51667	15.3167	Other
Angola	Cuanza Norte	Quirima Health Post	Posto de Saúde	MoH	-9.27733	15.0321	Other
Angola	Cuanza Norte	Quiringo Health Post	Posto de Saúde	MoH	-9.58333	14.5833	Other
Angola	Cuanza Norte	Quissecula Health Post	Posto de Saúde	MoH	-9.45861	15.1766	Other
Angola	Cuanza Norte	Samba-Caju Municipal Health Centre	Centro de Saúde	MoH	-8.767	15.417	Other
Angola	Cuanza Norte	Samba-Lucala Health Post	Posto de Saúde	MoH	-8.983	15.583	Other
Angola	Cuanza Norte	Sassa Health Centre	Centro de Saúde	MoH	-9.30654	14.8993	Other
Angola	Cuanza Norte	Saúde Cazengo Municipal Health Centre	Centro de Saúde	MoH	-9.33333	14.7667	Other
Angola	Cuanza Norte	Sector de Caculo-Cabata Health Post	Posto de Saúde	MoH	-8.7456	15.2654	Other
Angola	Cuanza Norte	Sector do Mussabo Health Post	Posto de Saúde	MoH	-8.66307	15.5575	Other
Angola	Cuanza Norte	Sector do Pambos de Sonhe Health Post	Posto de Saúde	MoH	-8.53333	15.4167	Other
Angola	Cuanza Norte	Sector do Quidiulo Health Post	Posto de Saúde	MoH	-8.61667	15.3667	Other
Angola	Cuanza Norte	Tango Health Post	Posto de Saúde	MoH	-8.1	15.6333	Other
Angola	Cuanza Norte	Terreiro Health Post	Posto de Saúde	MoH	-8.43333	15.1	Other
Angola	Cuanza Norte	Tita Health Post	Posto de Saúde	MoH	-8.53333	15.2667	Other
Angola	Cuanza Norte	Tombe Tombe Health Post	Posto de Saúde	MoH	-9.30465	14.9154	Encarta
Angola	Cuanza Norte	Velho Iango Health Post	Posto de Saúde	MoH	-8.97646	14.7123	Other
Angola	Cuanza Norte	Zanga Health Post	Posto de Saúde	MoH	-9.20392	14.992	Other
Angola	Cuanza Norte	Zavula Health Post	Posto de Saúde	MoH	-9.31667	14.7667	Other
Angola	Cuanza Norte	Zenza Itombe Health Post	Posto de Saúde	MoH	-9.28179	14.2201	Other
Angola	Cuanza Sul	Aldeamento No. Health Post	Posto de Saúde	MoH	-11.3646	15.1685	Combination
Angola	Cuanza Sul	Aldeamento No. Health Post	Posto de Saúde	MoH	-11.352	15.151	Other
Angola	Cuanza Sul	Aldeamento No. Health Post	Posto de Saúde	MoH	-11.3043	15.1684	Combination
Angola	Cuanza Sul	Aldeamento No. Health Post	Posto de Saúde	MoH	-11.2719	15.0759	Combination
Angola	Cuanza Sul	Aldeamento No. Health Post	Posto de Saúde	MoH	-11.2467	15.1388	Combination
Angola	Cuanza Sul	Aldeamento No.11 Health Post	Posto de Saúde	MoH	-11.4287	15.0746	Combination
Angola	Cuanza Sul	Aldeamento No.7 Health Post	Posto de Saúde	MoH	-11.3966	15.0893	Combination
Angola	Cuanza Sul	Alegria Centro Materno Infantil	Centro Materno Infantil	MoH
Angola	Cuanza Sul	Aliwaio do Galo Health Post	Posto de Saúde	MoH	-11.3717	14.3322	Other
Angola	Cuanza Sul	Ambande Health Post	Posto de Saúde	MoH	-11.739	14.224	Other
Angola	Cuanza Sul	Amboim Municipal Hospital	Municipal Hospital	Govt.	-10.7273	13.7561	Google Earth
Angola	Cuanza Sul	Amboim Policlfnico Health Centre	Centro de Saúde	MoH	-10.7306	13.7581	Google Earth
Angola	Cuanza Sul	Amboiva Health Post	Posto de Saúde	MoH	-11.5267	14.7374	Other
Angola	Cuanza Sul	Andulo Ambile Health Post	Posto de Saúde	MoH	-10.7509	14.5553	Other
Angola	Cuanza Sul	Aricango Health Post	Posto de Saúde	MoH	-10.858	14.3883	Other
Angola	Cuanza Sul	Assaca Health Centre	Centro de Saúde	MoH
Angola	Cuanza Sul	Assango 10 Health Centre	Centro de Saúde	MoH	-10.9808	14.4155	Other
Angola	Cuanza Sul	Assango 2 Health Post	Posto de Saúde	MoH	-11.1448	14.5242	Other
Angola	Cuanza Sul	Atome Health Post	Posto de Saúde	MoH	-11.884	14.5681	Other
Angola	Cuanza Sul	Ave Moma Health Post	Posto de Saúde	MoH	-11.4201	14.4196	Other
Angola	Cuanza Sul	Bairro Kifuangondo	Posto de Saúde	MoH	-10.7374	14.991	Other
Angola	Cuanza Sul	Balaie Health Post	Posto de Saúde	MoH
Angola	Cuanza Sul	Bandua Health Post	Posto de Saúde	MoH	-11.85	14.9333	Other
Angola	Cuanza Sul	Bango Health Post	Posto de Saúde	MoH	-11.3513	14.2255	Other
Angola	Cuanza Sul	Bango Health Post	Posto de Saúde	MoH	-10.8496	14.6484	Other
Angola	Cuanza Sul	Banza Futa Health Post	Posto de Saúde	MoH	-11.2023	14.909	Other
Angola	Cuanza Sul	Banza-Choa	Posto de Saúde	MoH	-10.952	14.6008	Other
Angola	Cuanza Sul	Belo Horizonte Health Post	Posto de Saúde	MoH	-10.744	13.7684	Combination
Angola	Cuanza Sul	Benzengulo Health Post	Posto de Saúde	MoH	-11.0489	13.9837	Other
Angola	Cuanza Sul	Boa Entrada Regional Hospital	Regional Hospital	Govt.	-10.868	14.3285	Other
Angola	Cuanza Sul	Boa Esperanta Centro Materno Infantil	Centro Materno Infantil	MoH	-10.8946	16.0518	Other
Angola	Cuanza Sul	Boa Lembranta Health Post	Posto de Saúde	MoH	-10.8759	14.3646	Other
Angola	Cuanza Sul	Boa Lembranta Health Post	Posto de Saúde	MoH
Angola	Cuanza Sul	Bombo Health Post	Posto de Saúde	MoH	-11.49	14.3369	Other
Angola	Cuanza Sul	Botera Health Post	Posto de Saúde	MoH	-11.6125	14.3004	Other
Angola	Cuanza Sul	BTu Health Post	Posto de Saúde	MoH	-10.8848	14.3671	Other
Angola	Cuanza Sul	Buli Health Post	Posto de Saúde	MoH
Angola	Cuanza Sul	Bulumbo Health Post	Posto de Saúde	MoH	-10.6046	16.006	Other
Angola	Cuanza Sul	Bungo Health Centre	Centro de Saúde	MoH	-9.81667	14.65	Other
Angola	Cuanza Sul	Cabuta Health Post	Posto de Saúde	MoH	-9.83642	14.8701	Other
Angola	Cuanza Sul	Cachoeiras Health Post	Posto de Saúde	MoH	-10.99	14.1	Other
Angola	Cuanza Sul	Cacombolo Health Post	Posto de Saúde	MoH	-11.0557	14.2164	Other
Angola	Cuanza Sul	Cacota Health Post	Posto de Saúde	MoH
Angola	Cuanza Sul	Cacula Health Post	Posto de Saúde	MoH	-11.1376	14.4435	Other
Angola	Cuanza Sul	Cacumba Luis	Posto de Saúde	MoH	-11.6445	14.2361	Other
Angola	Cuanza Sul	Cainja Health Post	Posto de Saúde	MoH	-11.4287	14.2462	Other
Angola	Cuanza Sul	Calele Health Post	Posto de Saúde	MoH	-10.414	13.6955	Other
Angola	Cuanza Sul	Calunhomo Health Centre	Centro de Saúde	MoH	-10.5035	16.0115	Other
Angola	Cuanza Sul	Cambalo Health Post	Posto de Saúde	MoH	-10.9431	13.9487	Other
Angola	Cuanza Sul	Cambaw	Posto de Saúde	MoH	-10.0891	15.2153	Other
Angola	Cuanza Sul	Candele Health Post	Posto de Saúde	MoH	-10.9121	14.4478	Other
Angola	Cuanza Sul	Candumbo Health Post	Posto de Saúde	MoH	-10.7328	13.7728	Other
Angola	Cuanza Sul	Cangongolo Health Post	Posto de Saúde	MoH	-11.0002	13.9583	Other
Angola	Cuanza Sul	Caninda Nova Health Post	Posto de Saúde	MoH	-11.517	15.3288	Other
Angola	Cuanza Sul	Capole Health Post	Posto de Saúde	MoH	-10.5159	14.007	Other
Angola	Cuanza Sul	Capolo 1 Health Post	Posto de Saúde	MoH	-11.1945	14.2538	Other
Angola	Cuanza Sul	Cariango Health Post	Posto de Saúde	MoH	-10.5797	15.33	Other
Angola	Cuanza Sul	Carimba Health Post	Posto de Saúde	MoH	-11.0807	13.864	Other
Angola	Cuanza Sul	Casa Branca Health Post	Posto de Saúde	MoH	-11.5385	13.8158	Other
Angola	Cuanza Sul	Cassequele Health Post	Posto de Saúde	MoH	-11.9333	15.3	Other
Angola	Cuanza Sul	Cassonga Health Post	Posto de Saúde	MoH	-11.0497	14.0008	Other
Angola	Cuanza Sul	Cassongue Municipal Hospital	Municipal Hospital	Govt.	-11.8503	15.0518	Other
Angola	Cuanza Sul	CassonguT Centro Materno Infantil	Centro Materno Infantil	MoH	-10.5834	14.3485	Combination
Angola	Cuanza Sul	Cassoto Health Post	Posto de Saúde	MoH	-11.3543	15.2693	Other
Angola	Cuanza Sul	Cassuada Health Centre	Centro de Saúde	MoH	-10.6159	13.9652	Other
Angola	Cuanza Sul	Cassussua Health Post	Posto de Saúde	MoH	-10.7419	14.3415	Other
Angola	Cuanza Sul	Catanda Health Post	Posto de Saúde	MoH	-11.4086	14.2206	Other
Angola	Cuanza Sul	Catandala Centro Materno Infantil	Centro Materno Infantil	MoH	-10.8456	14.3973	Other
Angola	Cuanza Sul	Catofe Health Post	Posto de Saúde	MoH	-10.8555	15.054	Other
Angola	Cuanza Sul	Cauaca Health Post	Posto de Saúde	MoH	-11.3882	15.067	Other
Angola	Cuanza Sul	Cawembe Health Post	Posto de Saúde	MoH	-11.017	14.199	Encarta
Angola	Cuanza Sul	Cawila Health Post	Posto de Saúde	MoH	-10.7379	13.776	Other
Angola	Cuanza Sul	Cela Municipal Hospital	Municipal Hospital	Govt.	-11.4233	15.1268	Google Earth
Angola	Cuanza Sul	Chieke Health Post	Posto de Saúde	MoH
Angola	Cuanza Sul	Chilumbo Health Post	Posto de Saúde	MoH
Angola	Cuanza Sul	Chimbangua Health Post	Posto de Saúde	MoH
Angola	Cuanza Sul	Chinendele Health Post	Posto de Saúde	MoH	-11.4143	14.4821	Other
Angola	Cuanza Sul	Chingo Health Centre	Centro de Saúde	MoH	-11.1799	13.8687	Other
Angola	Cuanza Sul	Chipaca Health Post	Posto de Saúde	MoH	-11.722	14.1534	Other
Angola	Cuanza Sul	Chipury Health Post	Posto de Saúde	MoH	-11.1677	13.8444	Combination
Angola	Cuanza Sul	Chol-Chol Health Post	Posto de Saúde	MoH	-10.9477	14.0775	Other
Angola	Cuanza Sul	Cipres Centro Materno Infantil	Centro Materno Infantil	MoH
Angola	Cuanza Sul	Coma Health Post	Posto de Saúde	MoH
Angola	Cuanza Sul	Comandante Valedia Health Centre	Centro de Saúde	MoH	-11.422	15.1258	Other
Angola	Cuanza Sul	Conda Municipal Hospital	Municipal Hospital	Govt.	-11.1032	14.3306	Other
Angola	Cuanza Sul	CondT Health Centre	Centro de Saúde	MoH	-10.8451	14.6763	Other
Angola	Cuanza Sul	Cruzamento Health Post	Posto de Saúde	MoH	-11.8514	15.0457	Google Earth
Angola	Cuanza Sul	Cuacra Health Post	Posto de Saúde	MoH	-11.184	14.083	Encarta
Angola	Cuanza Sul	Cubal 6 Pontes Health Post	Posto de Saúde	MoH	-11.5009	14.0802	Other
Angola	Cuanza Sul	Cumbira 1 Health Post	Posto de Saúde	MoH	-11.2167	14.6	Other
Angola	Cuanza Sul	Cunjo Health Post	Posto de Saúde	MoH	-11.1553	14.572	Other
Angola	Cuanza Sul	Dende Health Post	Posto de Saúde	MoH	-10.6721	13.8232	Other
Angola	Cuanza Sul	Deolinda Rodrigues Centro Materno Infantil	Centro Materno Infantil	MoH	-10.7618	13.752	Other
Angola	Cuanza Sul	Dumbo 1 Health Post	Posto de Saúde	MoH	-11.0933	14.3725	Other
Angola	Cuanza Sul	Ebo Municipal Hospital	Municipal Hospital	Govt.	-11.0426	14.6977	Other
Angola	Cuanza Sul	Estatpo Regional Health Post	Posto de Saúde	MoH	-10.7249	13.7573	Google Earth
Angola	Cuanza Sul	Fortuna Centro Materno Infantil	Centro Materno Infantil	MoH	-10.748	13.7683	Other
Angola	Cuanza Sul	Gango	Posto de Saúde	MoH	-10.6002	15.8963	Other
Angola	Cuanza Sul	Ganja Health Post	Posto de Saúde	MoH	-11.4743	13.82	Encarta
Angola	Cuanza Sul	Ganja Health Post	Posto de Saúde	MoH	-11.2833	14.3333	Other
Angola	Cuanza Sul	Gonga Health Post	Posto de Saúde	MoH	-11.6189	14.8011	Other
Angola	Cuanza Sul	Guarna Health Post	Posto de Saúde	MoH	-10.6943	14.3419	Other
Angola	Cuanza Sul	Guendela Health Post	Posto de Saúde	MoH	-11.0741	14.3888	Other
Angola	Cuanza Sul	Gungo Health Post	Posto de Saúde	MoH	-11.816	14.1531	Other
Angola	Cuanza Sul	Haco Health Post	Posto de Saúde	MoH	-10.1715	15.7147	Other
Angola	Cuanza Sul	Hala-Choa	Posto de Saúde	MoH	-11.1005	13.9286	Other
Angola	Cuanza Sul	Hala-Choa	Posto de Saúde	MoH	-11.0106	14.6115	Other
Angola	Cuanza Sul	Hanga (Cumbira 2) Health Post	Posto de Saúde	MoH	-11.2082	14.3442	Other
Angola	Cuanza Sul	Hanga 1 Health Post	Posto de Saúde	MoH
Angola	Cuanza Sul	Hogiwa Health Post	Posto de Saúde	MoH
Angola	Cuanza Sul	Hospital Geral 17 de Setembro	General Hospital	Govt.	-11.2043	13.8411	Other
Angola	Cuanza Sul	Hote Health Post	Posto de Saúde	MoH	-11.1771	14.0248	Encarta
Angola	Cuanza Sul	Huande Health Post	Posto de Saúde	MoH	-11.0333	14.3333	Other
Angola	Cuanza Sul	Huango 1 Health Post	Posto de Saúde	MoH	-11.1282	14.7665	Other
Angola	Cuanza Sul	Ingongolo Health Post	Posto de Saúde	MoH	-11.3576	14.278	Other
Angola	Cuanza Sul	Itumbo Health Post	Posto de Saúde	MoH	-11.6233	14.1822	Other
Angola	Cuanza Sul	Jombe Health Post	Posto de Saúde	MoH	-11.18	14.13	Other
Angola	Cuanza Sul	Kachongono Health Post	Posto de Saúde	MoH	-11.2804	15.1308	Other
Angola	Cuanza Sul	Kassapa Health Post	Posto de Saúde	MoH
Angola	Cuanza Sul	Kassumba Ex-Dala	Posto de Saúde	MoH	-11.0955	14.5708	Other
Angola	Cuanza Sul	Kichocota Health Post	Posto de Saúde	MoH
Angola	Cuanza Sul	Kicombo Health Post	Posto de Saúde	MoH	-11.3201	13.8196	Other
Angola	Cuanza Sul	Kienha Health Post	Posto de Saúde	MoH	-10.144	15.5958	Other
Angola	Cuanza Sul	Kilometro 11 Health Post	Posto de Saúde	MoH	-10.7284	13.8381	Other
Angola	Cuanza Sul	Kilometro 28 Health Post	Posto de Saúde	MoH
Angola	Cuanza Sul	Kilometro 40 Health Post	Posto de Saúde	MoH	-10.691	14.0816	Other
Angola	Cuanza Sul	Kilometro 40 Health Post	Posto de Saúde	MoH	-10.1996	16.1404	Other
Angola	Cuanza Sul	Kilunda Health Post	Posto de Saúde	MoH
Angola	Cuanza Sul	Kipungo Health Post	Posto de Saúde	MoH	-11.1522	14.6956	Other
Angola	Cuanza Sul	Kissanga (Sanga) Health Post	Posto de Saúde	MoH	-11.0062	14.9543	Other
Angola	Cuanza Sul	Kissanga Kungo Health Post	Posto de Saúde	MoH	-11.4217	15.1281	Other
Angola	Cuanza Sul	Kissange Health Post	Posto de Saúde	MoH	-11.3712	14.9001	Other
Angola	Cuanza Sul	Kissobe	Posto de Saúde	MoH	-11.148	14.8668	Other
Angola	Cuanza Sul	Kissongo Health Post	Posto de Saúde	MoH	-10.0319	15.086	Other
Angola	Cuanza Sul	Lambingo	Posto de Saúde	MoH	-11.0503	15.2799	Other
Angola	Cuanza Sul	Libolo Municipal Hospital	Municipal Hospital	Govt.	-10.0032	14.8959	Google Earth
Angola	Cuanza Sul	Longolo Health Post	Posto de Saúde	MoH	-10.1842	14.9601	Other
Angola	Cuanza Sul	Lonhe Health Post	Posto de Saúde	MoH	-10.8159	15.553	Other
Angola	Cuanza Sul	Lowa Health Post	Posto de Saúde	MoH	-10.5541	15.9514	Other
Angola	Cuanza Sul	Lussusso Health Post	Posto de Saúde	MoH	-10.1987	14.8079	Other
Angola	Cuanza Sul	Mangue Health Post	Posto de Saúde	MoH	-11.2711	14.793	Other
Angola	Cuanza Sul	Maria Agusta Health Post	Posto de Saúde	MoH	-10.9248	14.3489	Other
Angola	Cuanza Sul	Maria Helena Health Post	Posto de Saúde	MoH
Angola	Cuanza Sul	Maria Teresa Health Post	Posto de Saúde	MoH	-11.1077	14.3355	Other
Angola	Cuanza Sul	Menga Health Centre	Centro de Saúde	MoH	-11.7167	15.35	Other
Angola	Cuanza Sul	Minga Health Post	Posto de Saúde	MoH	-11.1051	14.2872	Other
Angola	Cuanza Sul	Misspo Health Post	Posto de Saúde	MoH	-10.7392	14.9793	Google Earth
Angola	Cuanza Sul	Moma da Banze Health Post	Posto de Saúde	MoH	-11.3897	14.4347	Other
Angola	Cuanza Sul	Moma da Fonseca Health Post	Posto de Saúde	MoH	-11.528	14.4277	Other
Angola	Cuanza Sul	Muhiliz Health Post	Posto de Saúde	MoH	-10.5712	16.1163	Other
Angola	Cuanza Sul	Munenga Health Post	Posto de Saúde	MoH	-10.0319	14.6361	Other
Angola	Cuanza Sul	Mungo	Posto de Saúde	MoH	-9.99385	14.8958	Other
Angola	Cuanza Sul	Muonha Health Post	Posto de Saúde	MoH	-11.1135	15.1431	Other
Angola	Cuanza Sul	Muquitixe Health Post	Posto de Saúde	MoH	-10.4203	14.9604	Other
Angola	Cuanza Sul	Mussende Centro Materno Infantil	Centro Materno Infantil	MoH	-10.942	16.1187	Combination
Angola	Cuanza Sul	Mussende Health Post	Posto de Saúde	MoH	-10.5055	16.0138	Other
Angola	Cuanza Sul	Mussende Municipal Hospital	Municipal Hospital	Govt.	-10.5175	16.0112	Other
Angola	Cuanza Sul	Ndala-Cachibo	Posto de Saúde	MoH	-10.4732	14.6539	Other
Angola	Cuanza Sul	Ngangula Health Centre	Centro de Saúde	MoH	-10.9904	13.9307	Other
Angola	Cuanza Sul	Ngola Lombo Health Post	Posto de Saúde	MoH	-10.3002	13.6444	Other
Angola	Cuanza Sul	Ngola Mussungo Health Post	Posto de Saúde	MoH	-10.79	13.7732	Other
Angola	Cuanza Sul	Nhime Health Post	Posto de Saúde	MoH	-11.2167	14.2333	Other
Angola	Cuanza Sul	Njanta Health Post	Posto de Saúde	MoH
Angola	Cuanza Sul	Pambangala Health Post	Posto de Saúde	MoH	-11.7072	15.2524	Other
Angola	Cuanza Sul	Panda Health Post	Posto de Saúde	MoH	-10.9076	13.8782	Other
Angola	Cuanza Sul	Pedra 1 Health Centre	Centro de Saúde	MoH	-11.2167	13.8583	Other
Angola	Cuanza Sul	Pedra Escrita Health Post	Posto de Saúde	MoH	-10.1623	14.7543	Other
Angola	Cuanza Sul	Pedra Preciosa Centro Materno Infantil	Centro Materno Infantil	MoH	-11.2101	13.8603	Other
Angola	Cuanza Sul	Pinda Health Centre	Centro de Saúde	MoH	-10.8209	13.8416	Other
Angola	Cuanza Sul	Pindo Health Post	Posto de Saúde	MoH	-11.1982	13.8703	Other
Angola	Cuanza Sul	Pomba Nova Health Post	Posto de Saúde	MoH	-11.239	13.8823	Other
Angola	Cuanza Sul	Ponte Santo Health Post	Posto de Saúde	MoH	-11.4039	14.3085	Combination
Angola	Cuanza Sul	Porto Amboim Municipal Hospital	Municipal Hospital	Govt.	-10.7283	13.7656	Other
Angola	Cuanza Sul	Praia Health Post	Posto de Saúde	MoH	-11.1831	13.865	Other
Angola	Cuanza Sul	Quibala Municipal Hospital	Municipal Hospital	Govt.	-10.7366	14.9794	Other
Angola	Cuanza Sul	Quilenda Municipal Hospital	Municipal Hospital	Govt.	-10.6405	14.3372	Other
Angola	Cuanza Sul	Quimone	Posto de Saúde	MoH	-10.624	14.9562	Other
Angola	Cuanza Sul	Quina (Capango) Health Post	Posto de Saúde	MoH	-10.8263	14.4108	Other
Angola	Cuanza Sul	Quipito Health Post	Posto de Saúde	MoH	-11.2548	14.1615	Other
Angola	Cuanza Sul	Quirimbo Health Post	Posto de Saúde	MoH	-10.6778	14.262	Other
Angola	Cuanza Sul	Quitundo Tongo Health Post	Posto de Saúde	MoH	-11.3343	15.2269	Other
Angola	Cuanza Sul	Sacriffcio Centro Materno Infantil	Centro Materno Infantil	MoH
Angola	Cuanza Sul	Salina Health Post	Posto de Saúde	MoH	-10.8996	14.256	Other
Angola	Cuanza Sul	Salinas Health Post	Posto de Saúde	MoH	-11.2395	13.8795	Other
Angola	Cuanza Sul	Salvador Health Post	Posto de Saúde	MoH	-10.5966	16.0491	Other
Angola	Cuanza Sul	Sanga Health Post	Posto de Saúde	MoH	-11.136	15.4169	Other
Angola	Cuanza Sul	Santa Cruz Health Centre	Centro de Saúde	MoH	-11.1943	13.8528	Other
Angola	Cuanza Sul	Santo Agostinho Health Post	Posto de Saúde	MoH	-10.7994	16.0971	Other
Angola	Cuanza Sul	Sede Centro Materno Infantil	Centro Materno Infantil	MoH	-11.4224	15.1262	Combination
Angola	Cuanza Sul	Sede Health Centre	Centro de Saúde	MoH	-11.3932	14.3802	Other
Angola	Cuanza Sul	Sede Health Centre	Centro de Saúde	MoH	-11.2049	13.8404	Combination
Angola	Cuanza Sul	Sede Health Centre	Centro de Saúde	MoH	-10.7328	14.9783	Google Earth
Angola	Cuanza Sul	Sede Health Centre	Centro de Saúde	MoH	-10.7318	13.7549	Google Earth
Angola	Cuanza Sul	Sede Health Centre	Centro de Saúde	MoH	-10.504	14.0332	Other
Angola	Cuanza Sul	Sede Health Centre	Centro de Saúde	MoH	-10.0016	14.8959	Google Earth
Angola	Cuanza Sul	Seles Municipal Hospital	Municipal Hospital	Govt.	-11.4077	14.3047	Google Earth
Angola	Cuanza Sul	Spo Lucas Health Post	Posto de Saúde	MoH	-10.9425	16.1212	Other
Angola	Cuanza Sul	Spo Lucas Health Post	Posto de Saúde	MoH	-10.4412	14.4442	Combination
Angola	Cuanza Sul	St. Antenio Health Centre	Centro de Saúde	MoH	-11.7461	14.864	Other
Angola	Cuanza Sul	Sumbe Municipal Hospital	Municipal Hospital	Govt.	-11.1882	13.8576	Other
Angola	Cuanza Sul	Sumbe Policlfnico Health Centre	Centro de Saúde	MoH	-11.2045	13.8401	Google Earth
Angola	Cuanza Sul	Tari-Quicanzo	Posto de Saúde	MoH	-10.6796	14.7631	Other
Angola	Cuanza Sul	Tchitonde Health Post	Posto de Saúde	MoH	-11.7683	14.1222	Other
Angola	Cuanza Sul	Tenge Health Post	Posto de Saúde	MoH	-11.268	14.9415	Other
Angola	Cuanza Sul	Torre Quijiba Health Post	Posto de Saúde	MoH	-10.6834	14.1458	Other
Angola	Cuanza Sul	Tranganda	Posto de Saúde	MoH	-10.7639	14.8245	Other
Angola	Cuanza Sul	Ussuambanda Health Post	Posto de Saúde	MoH
Angola	Cuanza Sul	Valedia Health Post	Posto de Saúde	MoH	-11.0579	14.3327	Other
Angola	Cuanza Sul	Vida Abundante Centro Materno Infantil	Centro Materno Infantil	MoH	-10.6699	13.8589	Other
Angola	Cuanza Sul	Wake Health Post	Posto de Saúde	MoH	-11.4086	14.3007	Combination
Angola	Cuanza Sul	Xariaia Health Post	Posto de Saúde	MoH	-10.7058	14.4972	Other
Angola	Cuanza Sul	Zambia Health Post	Posto de Saúde	MoH	-10.93	14.1763	Other
Angola	Cuanza Sul	Zeufor Centro Materno Infantil	Centro Materno Infantil	MoH	-10.7318	13.7533	Combination
Angola	Cunene	Caham Hospital	Hospital	Govt.	-16.2828	14.3053	Combination
Angola	Cunene	Chiulo Hospital	Hospital	Govt.	-16.5324	14.8682	Google Earth
Angola	Cunene	Cunene Provincial Hospital	Provincial Hospital	Govt.	-17.0684	15.723	GPS
Angola	Cunene	Curoca Hospital	Hospital	Govt.	-16.6567	13.4237	Combination
Angola	Cunene	Cuvelai Hospital	Hospital	Govt.	-15.6648	15.8025	GPS
Angola	Cunene	Mercado Municipal Hospital	Municipal Hospital	Govt.	-16.7448	14.9715	GPS
Angola	Cunene	Namacunde Hospital	Hospital	Govt.	-17.3075	15.8442	GPS
Angola	Cunene	Oncocua Hospital	Hospital	Govt.	-16.6559	13.4298	Other
Angola	Huambo	Alto Calai Health Post	Posto de Saúde	MoH	-12.8503	15.551	Google Earth
Angola	Huambo	Alto Chiumbo Health Post	Posto de Saúde	MoH	-12.3752	16.1547	Other
Angola	Huambo	Alto Hama Municipal Hospital	Municipal Hospital	Govt.	-12.2214	15.5511	Google Earth
Angola	Huambo	Antenio Health Centre	Centro de Saúde	MoH	-12.8016	15.8889	Other
Angola	Huambo	Atuco Health Post	Posto de Saúde	MoH	-12.3867	15.7077	Other
Angola	Huambo	Bailundo Hospital	Hospital	Govt.	-12.199	15.8701	Other
Angola	Huambo	Bata Health Centre	Centro de Saúde	MoH	-11.7097	16.0689	Combination
Angola	Huambo	Bave Health Centre	Centro de Saúde	MoH	-12.6339	16.0462	Google Earth
Angola	Huambo	BelTm do Huambo Health Post	Posto de Saúde	MoH	-12.8038	15.6433	Other
Angola	Huambo	Benfica Alto Health Centre	Centro de Saúde	MoH	-12.7422	15.7469	Other
Angola	Huambo	Benfica Baixo Health Centre	Centro de Saúde	MoH	-12.7545	15.7459	Other
Angola	Huambo	Bimbe Health Centre	Centro de Saúde	MoH	-11.8201	15.8307	Other
Angola	Huambo	Boas -guas Health Post	Posto de Saúde	MoH	-12.7	16.0333	Other
Angola	Huambo	Bomba Alta Centro Materno Infantil	Centro Materno Infantil	MoH	-12.7731	15.722	Other
Angola	Huambo	Bonga Health Post	Posto de Saúde	MoH	-12.3	15.6167	Other
Angola	Huambo	Bongo Health Post	Posto de Saúde	MoH	-12.9923	15.3417	Other
Angola	Huambo	Caala Health Centre	Centro de Saúde	MoH	-12.84	15.52	Other
Angola	Huambo	Caala Municipal Hospital	Municipal Hospital	Govt.	-12.8514	15.5558	Other
Angola	Huambo	Cachaca Health Post	Posto de Saúde	MoH	-12.45	15.75	Other
Angola	Huambo	Cachilengue Health Post	Posto de Saúde	MoH	-12.6329	16.2744	Other
Angola	Huambo	Cachiungo Centro Materno Infantil	Centro Materno Infantil	MoH	-12.562	16.219	Encarta
Angola	Huambo	Cachiungo Municipal Hospital	Municipal Hospital	Govt.	-13.1	16.4333	Other
Angola	Huambo	Cacilhas Health Centre	Centro de Saúde	MoH	-12.7795	15.7663	Other
Angola	Huambo	Cacoma Health Centre	Centro de Saúde	MoH	-12.5924	15.2101	Other
Angola	Huambo	Cacucu Health Post	Posto de Saúde	MoH	-12.8591	15.068	Google Earth
Angola	Huambo	Cahululo Health Post	Posto de Saúde	MoH	-12.8178	15.7017	Other
Angola	Huambo	Calandula Health Post	Posto de Saúde	MoH	-12.8289	15.8856	Other
Angola	Huambo	Calei Cuchila Health Post	Posto de Saúde	MoH	-12.6946	15.605	Other
Angola	Huambo	Calenga Health Centre	Centro de Saúde	MoH	-12.8458	15.4708	Other
Angola	Huambo	Calenga Jolo Health Post	Posto de Saúde	MoH	-12.938	15.3316	Other
Angola	Huambo	Caliamamo Health Post	Posto de Saúde	MoH	-12.667	15.449	Encarta
Angola	Huambo	Calicoque Health Post	Posto de Saúde	MoH	-12.722	15.6689	Other
Angola	Huambo	Calilongue Health Post	Posto de Saúde	MoH	-12.5746	15.3115	Other
Angola	Huambo	Calima Health Centre	Centro de Saúde	MoH	-12.8813	15.8189	Other
Angola	Huambo	Calomanda Health Post	Posto de Saúde	MoH	-12.7741	15.7235	Other
Angola	Huambo	Calombeu Health Post	Posto de Saúde	MoH	-11.8167	15.6	Other
Angola	Huambo	Calueyo Health Post	Posto de Saúde	MoH	-13.3255	16.0168	Other
Angola	Huambo	Calueyo Health Post	Posto de Saúde	MoH	-12.9333	15.6333	Other
Angola	Huambo	Calueyo Health Post	Posto de Saúde	MoH	-12.6633	15.7816	Other
Angola	Huambo	Calulo-Hengue Health Centre	Centro de Saúde	MoH	-11.65	15.65	Other
Angola	Huambo	Calunda Health Post	Posto de Saúde	MoH	-12.5004	16.029	Other
Angola	Huambo	Cambia Health Post	Posto de Saúde	MoH	-12.4833	15.4	Other
Angola	Huambo	Cambuengo Health Centre	Centro de Saúde	MoH	-11.7077	16.0741	Other
Angola	Huambo	Cambuio Baixo Health Post	Posto de Saúde	MoH	-12.7	15.9167	Other
Angola	Huambo	Caminho de Ferro de Benguela Hospital	Hospital	Govt.	-12.7702	15.7372	Other
Angola	Huambo	Candandi Health Post	Posto de Saúde	MoH	-12.096	15.7651	Other
Angola	Huambo	Candingo Health Post	Posto de Saúde	MoH	-12.7417	15.4721	Other
Angola	Huambo	Candumbo Health Post	Posto de Saúde	MoH	-12.436	15.8839	Combination
Angola	Huambo	Cangombe Health Post	Posto de Saúde	MoH	-12.825	16.1165	Other
Angola	Huambo	Cangombe Health Post	Posto de Saúde	MoH	-12.439	15.6555	Other
Angola	Huambo	Cantpo Paula Health Post	Posto de Saúde	MoH	-12.8559	15.555	Google Earth
Angola	Huambo	Capalacassa Health Post	Posto de Saúde	MoH	-12.8386	14.8616	Other
Angola	Huambo	Capango Health Post	Posto de Saúde	MoH	-12.8833	15.9333	Other
Angola	Huambo	Capigala Health Post	Posto de Saúde	MoH	-12.8539	15.918	Other
Angola	Huambo	Capunje Health Post	Posto de Saúde	MoH	-12.9378	15.4703	Other
Angola	Huambo	Caputo Health Post	Posto de Saúde	MoH	-12.3667	15.8833	Other
Angola	Huambo	Cassema Health Post	Posto de Saúde	MoH	-12.9725	15.7715	Other
Angola	Huambo	Cassenje Health Post	Posto de Saúde	MoH	-12.0833	16.4	Other
Angola	Huambo	Casseque III Health Centre	Centro de Saúde	MoH	-12.9966	15.9266	Other
Angola	Huambo	Cassoco Health Post	Posto de Saúde	MoH	-12.8817	15.5213	Other
Angola	Huambo	Cassuculo Health Post	Posto de Saúde	MoH	-12.7176	15.8371	Other
Angola	Huambo	Cassupi Health Post	Posto de Saúde	MoH	-12.9895	15.4545	Other
Angola	Huambo	Catabola Health Centre	Centro de Saúde	MoH	-13.1167	15.1667	Other
Angola	Huambo	Catanda Health Post	Posto de Saúde	MoH	-12.6667	15.0333	Other
Angola	Huambo	Catata Health Centre	Centro de Saúde	MoH	-13.4	15.417	Other
Angola	Huambo	Catete Health Post	Posto de Saúde	MoH	-12.5316	15.8976	Other
Angola	Huambo	Catuta Health Post	Posto de Saúde	MoH	-12.1912	15.7123	Other
Angola	Huambo	Cavili Health Post	Posto de Saúde	MoH
Angola	Huambo	Cavinda Health Post	Posto de Saúde	MoH	-13.1144	15.8287	Other
Angola	Huambo	Cavongue Health Centre	Centro de Saúde	MoH	-12.7079	15.6054	Other
Angola	Huambo	Cayumbuca Health Post	Posto de Saúde	MoH	-11.9354	16.4167	Other
Angola	Huambo	Chaliwewa Health Post	Posto de Saúde	MoH	-12.24	15.313	Encarta
Angola	Huambo	Changuir Health Post	Posto de Saúde	MoH	-12.3647	15.7747	Combination
Angola	Huambo	Chenga Health Post	Posto de Saúde	MoH	-12.8667	15.1333	Other
Angola	Huambo	Chiaca Health Centre	Centro de Saúde	MoH	-12.6325	14.9949	Other
Angola	Huambo	Chianga Health Centre	Centro de Saúde	MoH	-12.5081	15.6692	Other
Angola	Huambo	Chicala Centro Materno Infantil	Centro Materno Infantil	MoH
Angola	Huambo	Chicala Cholohanga Municipal Hospital	Municipal Hospital	Govt.	-12.4333	15.9	Other
Angola	Huambo	Chicoco Health Post	Posto de Saúde	MoH	-12.95	14.8833	Other
Angola	Huambo	Chilata Health Centre	Centro de Saúde	MoH	-12.9	15.25	Encarta
Angola	Huambo	Chilembo Health Post	Posto de Saúde	MoH	-13.0717	15.801	Other
Angola	Huambo	Chilongo Health Post	Posto de Saúde	MoH	-12.7888	15.7618	Combination
Angola	Huambo	Chingolo Health Post	Posto de Saúde	MoH	-12.0574	15.7549	Other
Angola	Huambo	Chinhala Health Post	Posto de Saúde	MoH	-12.1167	15.6333	Other
Angola	Huambo	Chinhama Health Centre	Centro de Saúde	MoH	-13.1014	16.4297	Other
Angola	Huambo	Chinjenje Health Centre	Centro de Saúde	MoH	-12.826	14.9313	Other
Angola	Huambo	Chinjenje Health CentreMI	Centro Sanatorio Materno Infantil	MoH
Angola	Huambo	Chipipa Health Centre	Centro de Saúde	MoH	-12.5664	15.7425	Other
Angola	Huambo	Chitatamela Health Post	Posto de Saúde	MoH	-12.3667	15.6333	Other
Angola	Huambo	Chiteta Health Post	Posto de Saúde	MoH	-12.0167	15.8	Other
Angola	Huambo	Chitue Health Post	Posto de Saúde	MoH	-12.6912	15.5692	Other
Angola	Huambo	Chituno Health Post	Posto de Saúde	MoH	-11.7667	15.7833	Other
Angola	Huambo	Chiumbo Health Centre	Centro de Saúde	MoH	-12.4833	16.1167	Other
Angola	Huambo	Chiva Health Centre	Centro de Saúde	MoH	-12.7336	15.7941	Other
Angola	Huambo	Chorindi Health Post	Posto de Saúde	MoH	-11.7052	16.0615	Google Earth
Angola	Huambo	Correia Humbi Health Post	Posto de Saúde	MoH	-12.2833	15.4833	Other
Angola	Huambo	Cruzeiro Health Post	Posto de Saúde	MoH	-12.7916	15.8871	Other
Angola	Huambo	Cuando Health Post	Posto de Saúde	MoH	-13.1537	15.7682	Other
Angola	Huambo	Cuima Health Centre	Centro de Saúde	MoH	-13.25	15.65	Other
Angola	Huambo	Cumbila Health Centre	Centro de Saúde	MoH	-12.1833	15.1333	Other
Angola	Huambo	Cuqueta Health Post	Posto de Saúde	MoH	-12.2771	15.2278	Other
Angola	Huambo	Damasco Health Post	Posto de Saúde	MoH	-11.7534	16.1467	Other
Angola	Huambo	Dango Health Post	Posto de Saúde	MoH	-12.8093	15.6782	Other
Angola	Huambo	Dondi Health Post	Posto de Saúde	MoH	-12.7546	16.4623	Other
Angola	Huambo	Dondo Health Post	Posto de Saúde	MoH	-12.6126	15.7575	Other
Angola	Huambo	Dongua Health Post	Posto de Saúde	MoH	-12.8753	15.5866	Other
Angola	Huambo	Dungo Health Post	Posto de Saúde	MoH	-12.8508	15.0663	Other
Angola	Huambo	Ecunha Health Centre	Centro de Saúde	MoH	-12.6819	15.5067	Other
Angola	Huambo	Ecunha Health CentreMI	Centro Sanatorio Materno Infantil	MoH	-12.6801	15.5101	Other
Angola	Huambo	Elende Health Post	Posto de Saúde	MoH	-12.7285	15.1441	Other
Angola	Huambo	Emanha Health Post	Posto de Saúde	MoH	-13.0382	15.2089	Other
Angola	Huambo	Essaque Health Post	Posto de Saúde	MoH	-12.7261	15.9805	Fallingrain
Angola	Huambo	Etalangala Health Post	Posto de Saúde	MoH	-12.817	14.933	Other
Angola	Huambo	Fatima Health Post	Posto de Saúde	MoH	-12.7988	15.7552	Other
Angola	Huambo	Funileiros Health Post	Posto de Saúde	MoH	-12.7915	15.7427	Google Earth
Angola	Huambo	Galanga Health Centre	Centro de Saúde	MoH	-12.0667	15.1333	Other
Angola	Huambo	Ganda Health Post	Posto de Saúde	MoH	-11.5167	15.8	Other
Angola	Huambo	Gandarinha Health Post	Posto de Saúde	MoH	-11.9167	16.1167	Other
Angola	Huambo	Golongo Health Post	Posto de Saúde	MoH	-12.2084	15.8514	Encarta
Angola	Huambo	Gove Health Centre	Centro de Saúde	MoH	-12.8608	15.5939	Other
Angola	Huambo	Gumba Health Post	Posto de Saúde	MoH	-11.6662	15.3882	Other
Angola	Huambo	Hanga Health Post	Posto de Saúde	MoH	-12.1589	15.9129	Other
Angola	Huambo	Huambo Hospital	Central Hospital	Govt.	-12.7661	15.7361	Other
Angola	Huambo	Huambo Sanitorio Hospital	Hospital	Govt.	-12.7888	15.7375	Other
Angola	Huambo	Jamba Health Post	Posto de Saúde	MoH	-12.0833	15.9667	Other
Angola	Huambo	Jimbo Health Post	Posto de Saúde	MoH	-13.517	15.613	Other
Angola	Huambo	Jongolo Health Post	Posto de Saúde	MoH	-12.882	15.815	Encarta
Angola	Huambo	Jopo Health Centre	Centro de Saúde	MoH	-12.5598	15.7851	Combination
Angola	Huambo	JosT Health Post	Posto de Saúde	MoH	-12.766	15.7773	Other
Angola	Huambo	Kilombo Health Post	Posto de Saúde	MoH	-12.8514	15.8192	Other
Angola	Huambo	Kilometro 25 Health Post	Posto de Saúde	MoH	-12.8938	15.5896	Google Earth
Angola	Huambo	Lepi Health Centre	Centro de Saúde	MoH	-12.8737	15.3976	Other
Angola	Huambo	Londuimbali Health Centre	Centro de Saúde	MoH	-12.249	15.3201	Other
Angola	Huambo	Londuimbali Health Centre	Centro de Saúde	MoH	-12.2454	15.3117	Combination
Angola	Huambo	Longonjo Health Centre	Centro de Saúde	MoH	-12.9004	15.2454	Other
Angola	Huambo	Longonjo Municipal Hospital	Municipal Hospital	Govt.	-12.8991	15.2531	Other
Angola	Huambo	Lossole Health Post	Posto de Saúde	MoH	-13.0174	14.9267	Other
Angola	Huambo	Lufefena Health Post	Posto de Saúde	MoH	-12.7694	15.685	Other
Angola	Huambo	Lunge Health Centre	Centro de Saúde	MoH	-12.211	16.1117	Other
Angola	Huambo	Luvemba Health Centre	Centro de Saúde	MoH	-12.016	15.6031	Other
Angola	Huambo	Luvili Health Post	Posto de Saúde	MoH	-12.7528	16.0256	Other
Angola	Huambo	Luvili Health Post	Posto de Saúde	MoH	-12.125	15.439	Google Earth
Angola	Huambo	M.C. Camunda Health Post	Posto de Saúde	MoH	-13.326	15.5693	Other
Angola	Huambo	Macolo Health Centre	Centro de Saúde	MoH
Angola	Huambo	Malanga Health Post	Posto de Saúde	MoH	-12.9734	15.9464	Other
Angola	Huambo	Mande Health Post	Posto de Saúde	MoH	-12.5137	15.6404	Other
Angola	Huambo	Mangumbala Health Post	Posto de Saúde	MoH	-12.8645	15.5657	Google Earth
Angola	Huambo	Mbungue Health Post	Posto de Saúde	MoH	-12.9067	15.2533	Other
Angola	Huambo	Missassa Health Post	Posto de Saúde	MoH	-12.7911	15.0793	Other
Angola	Huambo	Monte Belo Health Post	Posto de Saúde	MoH	-12.1945	15.8576	Other
Angola	Huambo	Muangunja Health Post	Posto de Saúde	MoH	-12.8164	15.5522	Other
Angola	Huambo	Munda Paiva Health Post	Posto de Saúde	MoH	-12.7494	15.7072	Other
Angola	Huambo	Mundundu Health Centre	Centro de Saúde	MoH	-13.0203	15.0752	Other
Angola	Huambo	Mungo Centro Materno Infantil	Centro Materno Infantil	MoH	-11.8354	16.2332	Other
Angola	Huambo	Mungo Municipal Hospital	Municipal Hospital	Govt.	-11.832	16.236	Other
Angola	Huambo	Ndele Health Post	Posto de Saúde	MoH	-13.1792	16.251	Other
Angola	Huambo	Ngongoinga Health Post	Posto de Saúde	MoH	-12.8961	15.7395	Other
Angola	Huambo	Nguelengue Health Post	Posto de Saúde	MoH	-13.3906	15.7106	Other
Angola	Huambo	Ngulawa Health Post	Posto de Saúde	MoH	-12.7663	15.7387	Google Earth
Angola	Huambo	Nondolo Health Post	Posto de Saúde	MoH
Angola	Huambo	Ombala Bule Health Post	Posto de Saúde	MoH	-12.4293	15.8207	Other
Angola	Huambo	Ombala Calembe Health Post	Posto de Saúde	MoH	-13.2997	16.246	Other
Angola	Huambo	Ombala Canjuca	Posto de Saúde	MoH	-12.284	15.385	Encarta
Angola	Huambo	Ombala Caputo Health Post	Posto de Saúde	MoH	-12.8413	15.917	Other
Angola	Huambo	Ombala Moma Health Post	Posto de Saúde	MoH	-12.7546	16.4381	Other
Angola	Huambo	Ombala Moma Health Post	Posto de Saúde	MoH	-11.7105	16.0692	Google Earth
Angola	Huambo	Ombala Sambo Health Post	Posto de Saúde	MoH	-13.0655	16.1212	Other
Angola	Huambo	Pedro Health Centre	Centro de Saúde	MoH	-12.8941	15.7967	Other
Angola	Huambo	Petroleo Health Post	Posto de Saúde	MoH	-12.7276	15.6076	Other
Angola	Huambo	Quipeio Health Centre	Centro de Saúde	MoH	-12.6951	15.5651	Other
Angola	Huambo	Regedoria Health Post	Posto de Saúde	MoH	-12.6789	15.5056	Fallingrain
Angola	Huambo	Sacalage Health Post	Posto de Saúde	MoH	-12.3016	15.6855	Other
Angola	Huambo	Sacaliga Health Post	Posto de Saúde	MoH	-12.8611	15.594	Google Earth
Angola	Huambo	Sacambuiyo Health Post	Posto de Saúde	MoH	-12.6289	16.0498	Google Earth
Angola	Huambo	Sacanombo Health Post	Posto de Saúde	MoH	-13.0109	15.5747	Other
Angola	Huambo	Sachitemo Health Post	Posto de Saúde	MoH	-12.9833	16	Other
Angola	Huambo	Sambalundo Health Post	Posto de Saúde	MoH	-12.5644	15.5428	Other
Angola	Huambo	Sambo Centro Materno Infantil	Centro Materno Infantil	MoH	-13.0588	16.1205	Other
Angola	Huambo	Sambo Health Centre	Centro de Saúde	MoH	-13.05	16.1333	Other
Angola	Huambo	Samboto Health Centre	Centro de Saúde	MoH	-12.4117	15.8361	Other
Angola	Huambo	Sambunjo Health Post	Posto de Saúde	MoH	-12.82	14.9937	Other
Angola	Huambo	Sandombo Health Post	Posto de Saúde	MoH	-13.0794	15.3929	Other
Angola	Huambo	Sanjepele Health Post	Posto de Saúde	MoH	-12.6887	15.6747	Other
Angola	Huambo	Santo Amaro Health Post	Posto de Saúde	MoH	-12.7146	15.8667	Other
Angola	Huambo	Savitangayala Health Post	Posto de Saúde	MoH	-12.7531	16.4027	Other
Angola	Huambo	Sipiti Health Post	Posto de Saúde	MoH	-12.9644	15.5658	Other
Angola	Huambo	Somanjamba Health Post	Posto de Saúde	MoH	-12.2618	15.3143	Other
Angola	Huambo	Spo Luis Health Post	Posto de Saúde	MoH	-12.7758	15.7381	Google Earth
Angola	Huambo	Spo Pedro Sumi Health Post	Posto de Saúde	MoH	-12.8462	15.5587	Other
Angola	Huambo	Spo Tarcisio Health Post	Posto de Saúde	MoH	-12.7868	15.7383	Google Earth
Angola	Huambo	Sucuanjali Health Post	Posto de Saúde	MoH	-12.8301	15.5973	Google Earth
Angola	Huambo	Talulua Health Post	Posto de Saúde	MoH	-12.8	16	Other
Angola	Huambo	Tchicala Health Post	Posto de Saúde	MoH	-12.7689	15.4614	Other
Angola	Huambo	Tchilela Health Post	Posto de Saúde	MoH	-12.5697	15.4569	Other
Angola	Huambo	Tchilombe Health Post	Posto de Saúde	MoH	-12.1171	16.2229	Other
Angola	Huambo	Tchivela Health Post	Posto de Saúde	MoH	-12.7077	15.1652	Combination
Angola	Huambo	Teresa Health Post	Posto de Saúde	MoH	-12.8094	15.9027	Other
Angola	Huambo	Ukuma Health Centre	Centro de Saúde	MoH	-12.8587	15.0691	Other
Angola	Huambo	Ukuma Municipal Hospital	Municipal Hospital	Govt.	-12.8661	15.0701	Other
Angola	Huambo	Ulondo Health Post	Posto de Saúde	MoH	-12.5346	15.9878	Other
Angola	Huambo	Ulundo Health Post	Posto de Saúde	MoH	-11.8206	15.8291	Combination
Angola	Huambo	Ussinda- Catota Health Post	Posto de Saúde	MoH	-12.7821	16.083	Other
Angola	Huambo	Ussoque Health Centre	Centro de Saúde	MoH	-12.35	15.1	Other
Angola	Huambo	Utende Health Post	Posto de Saúde	MoH	-11.515	15.7253	Other
Angola	Huambo	Vale do Queve Health Post	Posto de Saúde	MoH	-12.8539	15.7604	Combination
Angola	Huambo	Velha Chica Health Post	Posto de Saúde	MoH	-12.1999	15.85	Combination
Angola	Huambo	Vila Franca do Queve Health Post	Posto de Saúde	MoH	-11.9849	15.3639	Google Earth
Angola	Huila	Agostino Neto Hospital	Hospital	Govt.	-14.8843	13.5201	Other
Angola	Huila	Alto Bimbi Health Post	Posto de Saúde	MoH	-14.9889	13.32	Other
Angola	Huila	Alto Uaba Health Post	Posto de Saúde	MoH	-13.7854	14.8785	Other
Angola	Huila	Andefil Centro Materno Infantil	Centro Materno Infantil	MoH	-14.7649	13.9059	Combination
Angola	Huila	Anhara Health Post	Posto de Saúde	MoH	-14.0645	16.4217	Other
Angola	Huila	Arimba Health Centre	Centro de Saúde	MoH	-14.952	13.6018	Other
Angola	Huila	Bambi Health Centre	Centro de Saúde	MoH	-14.0535	15.5743	Other
Angola	Huila	Banda Health Post	Posto de Saúde	MoH
Angola	Huila	Bandeira Health Post	Posto de Saúde	MoH	-14.0167	15.1833	Other
Angola	Huila	Batabata Health Post	Posto de Saúde	MoH	-15.2425	13.3878	Other
Angola	Huila	Beu Health Post	Posto de Saúde	MoH	-14.5961	15.471	Combination
Angola	Huila	Bissapa Health Post	Posto de Saúde	MoH	-13.7	14.8833	Other
Angola	Huila	Bonga Health Post	Posto de Saúde	MoH	-14.0784	14.0797	Other
Angola	Huila	Buandangui Health Post	Posto de Saúde	MoH	-14.1869	14.4279	Other
Angola	Huila	Bula Matadi Health Centre	Centro de Saúde	MoH	-14.9052	13.5142	Other
Angola	Huila	Bulo Health Post	Posto de Saúde	MoH	-14.1896	14.6675	Other
Angola	Huila	Buloteque Health Post	Posto de Saúde	MoH	-13.8056	15.7952	Google Earth
Angola	Huila	Bunjei Health Centre	Centro de Saúde	MoH	-13.5333	16.0167	Other
Angola	Huila	Cabiri comercial Health Post	Posto de Saúde	MoH	-14.001	14.984	Encarta
Angola	Huila	Cabiri Regidoria Health Post	Posto de Saúde	MoH	-14.1371	14.9139	Combination
Angola	Huila	Cacola Health Post	Posto de Saúde	MoH	-14.7183	16.0414	Other
Angola	Huila	Cacolo Health Post	Posto de Saúde	MoH	-13.8798	14.828	Other
Angola	Huila	Cacula Municipal Hospital	Municipal Hospital	Govt.	-14.4927	14.1187	Combination
Angola	Huila	Caculuvale Health Post	Posto de Saúde	MoH	-14.9043	13.7372	Other
Angola	Huila	Cahala Health Post	Posto de Saúde	MoH	-13.9202	14.4599	Other
Angola	Huila	Caholo Health Centre	Centro de Saúde	MoH	-15.1333	13.3333	Other
Angola	Huila	Calumbo Health Post	Posto de Saúde	MoH
Angola	Huila	Caluquembe Municipal Hospital	Municipal Hospital	Govt.	-13.8833	14.5444	Combination
Angola	Huila	Caluva Health Post	Posto de Saúde	MoH	-14.8855	13.5975	Other
Angola	Huila	Caluvango Health Post	Posto de Saúde	MoH
Angola	Huila	Caluvombolo Health Post	Posto de Saúde	MoH	-13.8676	15.2483	Other
Angola	Huila	Camassi embala Health Post	Posto de Saúde	MoH	-13.73	15.2091	Other
Angola	Huila	Camassissa Health Post	Posto de Saúde	MoH	-13.8219	15.9328	Other
Angola	Huila	Cambandgi Health Post	Posto de Saúde	MoH
Angola	Huila	Cambole Health Post	Posto de Saúde	MoH	-14.0667	16.4167	Other
Angola	Huila	Camucuio Health Post	Posto de Saúde	MoH	-14.131	14.6781	Other
Angola	Huila	Camulemba Health Post	Posto de Saúde	MoH	-14.0782	14.0706	Combination
Angola	Huila	Camulemba Health Post	Posto de Saúde	MoH	-13.8795	14.3179	Other
Angola	Huila	Camunabe Health Post	Posto de Saúde	MoH
Angola	Huila	Candjanguiti Health Post	Posto de Saúde	MoH	-14.7503	15.0795	Combination
Angola	Huila	Canduco Health Post	Posto de Saúde	MoH	-13.5833	14.9333	Other
Angola	Huila	Cangolo Health Post	Posto de Saúde	MoH	-15	13.8667	Other
Angola	Huila	Canhandi Health Post	Posto de Saúde	MoH	-15.2284	16.039	Other
Angola	Huila	Capandeio Health Post	Posto de Saúde	MoH	-15.6511	13.7512	Other
Angola	Huila	Capelongo Hospital	Hospital	Govt.	-14.8904	15.0774	Combination
Angola	Huila	Capelongo Municipal Hospital	Municipal Hospital	Govt.	-14.4548	16.2937	Combination
Angola	Huila	Carmoloy Health Post	Posto de Saúde	MoH
Angola	Huila	Casa mae Health Post	Posto de Saúde	MoH	-14.9199	13.4701	Other
Angola	Huila	Cassoco Health Post	Posto de Saúde	MoH	-13.65	15	Other
Angola	Huila	Cassuca Health Post	Posto de Saúde	MoH
Angola	Huila	Castanheira Pera Health Post	Posto de Saúde	MoH	-14.8239	15.0293	Other
Angola	Huila	Catala Health Post	Posto de Saúde	MoH	-13.9561	13.9012	Other
Angola	Huila	Catapi baixo Health Post	Posto de Saúde	MoH	-13.8832	14.9455	Other
Angola	Huila	Cateya Health Post	Posto de Saúde	MoH	-13.777	14.6921	Other
Angola	Huila	Catonga Health Post	Posto de Saúde	MoH	-14.15	14.8167	Other
Angola	Huila	Catumbela Health Post	Posto de Saúde	MoH	-13.947	15.4686	Other
Angola	Huila	Cavi Health Post	Posto de Saúde	MoH
Angola	Huila	Centro Comunal Health Centre	Centro de Saúde	MoH	-14.6956	16.026	Combination
Angola	Huila	Chaungo Health Post	Posto de Saúde	MoH	-15.2333	13.8667	Other
Angola	Huila	Chem Chem Health Post	Posto de Saúde	MoH	-14.7089	14.1022	Other
Angola	Huila	Cheraquera Health Post	Posto de Saúde	MoH	-14.5173	15.0463	Other
Angola	Huila	Chiange Health Centre	Centro de Saúde	MoH	-15.733	13.9	Other
Angola	Huila	Chibemba Health Post	Posto de Saúde	MoH	-15.75	14.083	Other
Angola	Huila	Chibia Municipal Health Centre	Centro de Saúde	MoH	-15.1823	13.7031	Other
Angola	Huila	Chibolelo Health Post	Posto de Saúde	MoH	-15.7522	14.0756	Combination
Angola	Huila	Chicambi Health Post	Posto de Saúde	MoH	-13.7667	15.3333	Other
Angola	Huila	Chicomba Municipal Hospital	Municipal Hospital	Govt.	-14.1322	14.9201	Other
Angola	Huila	Chicomba Velha Health Post	Posto de Saúde	MoH	-14.1912	14.9092	Other
Angola	Huila	Chiconco Health Post	Posto de Saúde	MoH
Angola	Huila	Chicuaqueya Health Post	Posto de Saúde	MoH	-14.3551	14.25	Encarta
Angola	Huila	Chicungo Health Post	Posto de Saúde	MoH	-14.8833	14.2	Other
Angola	Huila	Chilunda Health Post	Posto de Saúde	MoH	-14.1146	14.5189	Other
Angola	Huila	Chimbalandongo Health Post	Posto de Saúde	MoH	-14.25	15.1	Other
Angola	Huila	Chimukua Health Post	Posto de Saúde	MoH	-15.0696	13.9811	Other
Angola	Huila	Chindendema Health Post	Posto de Saúde	MoH	-13.7821	14.5397	Other
Angola	Huila	Chindingui Health Post	Posto de Saúde	MoH
Angola	Huila	Chinjenje Health Post	Posto de Saúde	MoH	-13.6913	15.0866	Other
Angola	Huila	Chipindo Municipal Hospital	Municipal Hospital	Govt.	-13.8162	15.7861	Other
Angola	Huila	Chitapua Health Post	Posto de Saúde	MoH	-14.4	15.2833	Other
Angola	Huila	Chituto Health Post	Posto de Saúde	MoH	-15.068	13.432	Encarta
Angola	Huila	Chivulu Health Post	Posto de Saúde	MoH	-14.234	14.363	Other
Angola	Huila	Chiyoya Health Post	Posto de Saúde	MoH	-13.65	15.8937	Combination
Angola	Huila	Cola Health Centre	Centro de Saúde	MoH	-13.6	14.8333	Other
Angola	Huila	Comarca Health Post	Posto de Saúde	MoH	-14.9326	13.5695	Combination
Angola	Huila	Condjendgi Health Post	Posto de Saúde	MoH	-15.0412	13.6051	Other
Angola	Huila	Conjao Health Post	Posto de Saúde	MoH	-13.7875	15.2758	Combination
Angola	Huila	Cuanja Municipal Hospital	Municipal Hospital	Govt.	-14.6944	16.0259	Combination
Angola	Huila	Cue I Health Post	Posto de Saúde	MoH	-13.9263	14.7348	Other
Angola	Huila	Cue III Health Post	Posto de Saúde	MoH	-14.0339	14.769	Other
Angola	Huila	Cusse Health Post	Posto de Saúde	MoH	-13.517	15.2	Other
Angola	Huila	Cussesse Health Post	Posto de Saúde	MoH	-13.7898	14.6858	Combination
Angola	Huila	Cutembo Health Post	Posto de Saúde	MoH	-13.85	14.1	Other
Angola	Huila	Cutenda Health Post	Posto de Saúde	MoH	-14.3667	15.0833	Other
Angola	Huila	Dafran Centro Materno Infantil	Centro Materno Infantil	MoH
Angola	Huila	Dende Health Post	Posto de Saúde	MoH	-13.8397	14.934	Other
Angola	Huila	Dengue Health Post	Posto de Saúde	MoH	-13.7352	15.057	Other
Angola	Huila	Deus Ajuda Health Post	Posto de Saúde	MoH	-15.0066	13.3746	Combination
Angola	Huila	Dilidinda Health Post	Posto de Saúde	MoH	-14.504	14.9013	Other
Angola	Huila	Dongue Health Post	Posto de Saúde	MoH	-15.4235	14.0375	Other
Angola	Huila	Dovala Health Post	Posto de Saúde	MoH	-13.5497	15.9642	Other
Angola	Huila	Etunda Health Post	Posto de Saúde	MoH	-13.7994	14.6787	Combination
Angola	Huila	FazenTomba Health Post	Posto de Saúde	MoH	-15.6002	13.8003	Other
Angola	Huila	Fendi Health Post	Posto de Saúde	MoH	-14.0667	15.3667	Other
Angola	Huila	Figueira Health Post	Posto de Saúde	MoH	-14.9667	13.5693	Other
Angola	Huila	Frexiel Health Post	Posto de Saúde	MoH	-14.9252	15.1035	Other
Angola	Huila	Galangue Health Centre	Centro de Saúde	MoH	-13.7992	16.1031	Other
Angola	Huila	Gandu Health Post	Posto de Saúde	MoH	-13.7587	14.6981	Combination
Angola	Huila	Gervei Health Post	Posto de Saúde	MoH
Angola	Huila	Gloria Deus Centro Materno Infantil	Centro Materno Infantil	MoH	-15.1838	13.692	Google Earth
Angola	Huila	Guela Health Post	Posto de Saúde	MoH	-13.7587	14.6993	Combination
Angola	Huila	Heque Health Centre	Centro de Saúde	MoH	-14.6607	13.9048	Other
Angola	Huila	Hidromina Health Centre	Centro de Saúde	MoH
Angola	Huila	Hole Health Post	Posto de Saúde	MoH	-14.2718	13.7862	Other
Angola	Huila	Hombo Health Post	Posto de Saúde	MoH	-14.9	14.8	Other
Angola	Huila	Hondeque Health Post	Posto de Saúde	MoH	-14.357	14.6774	Other
Angola	Huila	Hufla Health Centre	Centro de Saúde	MoH	-15.0607	13.5469	Other
Angola	Huila	Hungo Health Post	Posto de Saúde	MoH
Angola	Huila	Hungulo Health Post	Posto de Saúde	MoH	-14.498	16.2814	Other
Angola	Huila	IESA Municipal Hospital	Municipal Hospital	Govt.	-13.8137	14.6783	Combination
Angola	Huila	Igreja Evangelica Sinodal de Angola Hospital	Hospital	Govt.	-13.7966	14.6805	Google Earth
Angola	Huila	Indungo Health Post	Posto de Saúde	MoH	-14.8167	16.2667	Other
Angola	Huila	Jamba Municipal Hospital	Municipal Hospital	Govt.	-14.6822	16.0361	Other
Angola	Huila	Januário Calola Municipal Hospital	Municipal Hospital	Govt.	-14.1369	14.9124	Combination
Angola	Huila	Jau Health Post	Posto de Saúde	MoH	-15.2333	13.5167	Other
Angola	Huila	Kabana Health Post	Posto de Saúde	MoH	-14.6171	15.4911	Other
Angola	Huila	Kafela Health Post	Posto de Saúde	MoH
Angola	Huila	Kaila Health Post	Posto de Saúde	MoH
Angola	Huila	Kainda Health Post	Posto de Saúde	MoH
Angola	Huila	Kalei Health Post	Posto de Saúde	MoH	-14.473	16.2881	Other
Angola	Huila	Kalemba Health Post	Posto de Saúde	MoH	-14.3646	16.4485	Other
Angola	Huila	Kalemba Tchitunda Health Post	Posto de Saúde	MoH	-14.5599	15.0204	Other
Angola	Huila	Kalepi Health Post	Posto de Saúde	MoH	-13.8718	14.5017	Other
Angola	Huila	Kamana Health Post	Posto de Saúde	MoH	-15.1926	13.6825	Google Earth
Angola	Huila	Kangolo Health Post	Posto de Saúde	MoH	-14.9976	13.876	Other
Angola	Huila	Kapelongo Hospital	Hospital	Govt.	-14.8823	15.0861	Other
Angola	Huila	Kassinda Health Post	Posto de Saúde	MoH	-14.6649	16.0644	Combination
Angola	Huila	Katala Health Post	Posto de Saúde	MoH
Angola	Huila	Kativa Health Post	Posto de Saúde	MoH	-14.2159	16.1764	Other
Angola	Huila	Katoco Health Post	Posto de Saúde	MoH	-14.5328	16.3584	Other
Angola	Huila	Katoho Health Post	Posto de Saúde	MoH
Angola	Huila	Kilometro 15 Health Post	Posto de Saúde	MoH	-14.742	14.8929	Other
Angola	Huila	Kilometro 16 Health Post	Posto de Saúde	MoH	-15.0161	13.5938	Other
Angola	Huila	Kilometro 50 Health Post	Posto de Saúde	MoH	-14.6343	16.3947	Combination
Angola	Huila	Kilometro 9 Health Post	Posto de Saúde	MoH
Angola	Huila	Kolui Health Post	Posto de Saúde	MoH
Angola	Huila	Kussava Health Post	Posto de Saúde	MoH	-14.513	15.9929	Other
Angola	Huila	Kuvango Comunal Health Centre	Centro de Saúde	MoH	-14.467	16.3	Other
Angola	Huila	Kuvango Municipal Health Centre	Centro de Saúde	MoH	-14.4662	16.3031	Other
Angola	Huila	Kuvelai Health Post	Posto de Saúde	MoH	-14.5527	14.7803	Other
Angola	Huila	Kwawa Health Post	Posto de Saúde	MoH
Angola	Huila	Lalula Health Post	Posto de Saúde	MoH	-14.647	13.9283	Combination
Angola	Huila	Leba Health Post	Posto de Saúde	MoH	-15.0833	13.2667	Other
Angola	Huila	Libongue Health Post	Posto de Saúde	MoH	-14.1667	15.1667	Other
Angola	Huila	Lombindi Health Post	Posto de Saúde	MoH
Angola	Huila	Lomupa Health Post	Posto de Saúde	MoH	-13.801	14.6843	Other
Angola	Huila	Lubango Central Hospital	Central Hospital	Govt.	-14.9163	13.5031	Other
Angola	Huila	Lubango Municipal Hospital	Municipal Hospital	Govt.	-14.895	13.5007	Combination
Angola	Huila	Lucon Missao Health Post	Posto de Saúde	MoH	-14.2924	13.9174	Other
Angola	Huila	Lucondo Health Post	Posto de Saúde	MoH	-14.3333	13.9711	Other
Angola	Huila	Lufinda Health Post	Posto de Saúde	MoH	-15.15	13.95	Other
Angola	Huila	Luheque Health Post	Posto de Saúde	MoH	-15.0282	13.3679	Combination
Angola	Huila	Luiovo Health Post	Posto de Saúde	MoH	-14.8175	13.6289	Other
Angola	Huila	Luseque Health Post	Posto de Saúde	MoH	-14.6514	15.0701	Other
Angola	Huila	Machiqueira Health Centre	Centro de Saúde	MoH	-14.8893	13.5024	Combination
Angola	Huila	Malutuvu Health Post	Posto de Saúde	MoH	-15.86	14.0728	Combination
Angola	Huila	Mapumumo Health Post	Posto de Saúde	MoH	-14.0281	14.1379	Other
Angola	Huila	Mapunda Health Centre	Centro de Saúde	MoH
Angola	Huila	Margon Centro Materno Infantil	Centro Materno Infantil	MoH	-14.9331	13.6179	Combination
Angola	Huila	Matala Municipal Hospital	Municipal Hospital	Govt.	-14.7507	15.0403	Combination
Angola	Huila	Mateta Health Post	Posto de Saúde	MoH
Angola	Huila	Matuntu Health Post	Posto de Saúde	MoH	-15.3667	15.2667	Other
Angola	Huila	Mawenge Health Post	Posto de Saúde	MoH
Angola	Huila	Mbala ya Ndumba Health Post	Posto de Saúde	MoH	-14.4755	16.2137	Other
Angola	Huila	Mbala yo Mpate Health Post	Posto de Saúde	MoH	-14.9984	13.4354	Combination
Angola	Huila	Missao catolica Health Post	Posto de Saúde	MoH	-14.3936	16.294	Other
Angola	Huila	Missão Católica-Madre Isabel Hospital	Hospital	Govt.	-14.0999	14.9266	Combination
Angola	Huila	Missao Chilunda Health Post	Posto de Saúde	MoH	-13.9856	14.414	Other
Angola	Huila	Missao Health Post	Posto de Saúde	MoH	-15.1944	13.6843	Other
Angola	Huila	Missao Igreja EvangTlica Congregacional em Angola (IECA) Health Post	Posto de Saúde	MoH	-13.8178	15.7887	Google Earth
Angola	Huila	Missao Santiago Health Centre	Centro de Saúde	MoH
Angola	Huila	Mitcha Hospital	Hospital	Govt.	-14.8944	13.4981	Other
Angola	Huila	Mpity Health Post	Posto de Saúde	MoH	-15.1823	13.6942	Google Earth
Angola	Huila	Mucoyo Health Post	Posto de Saúde	MoH
Angola	Huila	Muholo Health Post	Posto de Saúde	MoH	-14.7643	15.0156	Other
Angola	Huila	Mulenga Health Post	Posto de Saúde	MoH
Angola	Huila	Mumba Health Post	Posto de Saúde	MoH	-14.647	16.4455	Other
Angola	Huila	Mundinda Health Post	Posto de Saúde	MoH	-13.9391	15.4415	Other
Angola	Huila	Mundindi Health Post	Posto de Saúde	MoH
Angola	Huila	Munguila Health Post	Posto de Saúde	MoH	-13.6423	15.2573	Other
Angola	Huila	Muninho Health Post	Posto de Saúde	MoH	-15.0133	13.5605	Other
Angola	Huila	Mupopo Health Post	Posto de Saúde	MoH	-15.3478	15.8813	Other
Angola	Huila	Mussica Health Post	Posto de Saúde	MoH	-13.8978	15.1433	Other
Angola	Huila	Mussindja Health Post	Posto de Saúde	MoH	-14.144	13.9459	Other
Angola	Huila	Mutiapulu Health Post	Posto de Saúde	MoH	-15.167	15.6347	Other
Angola	Huila	Mutundo Health Post	Posto de Saúde	MoH	-14.8697	13.5937	Other
Angola	Huila	Nambambe Health Centre	Centro de Saúde	MoH	-14.8891	13.5209	Other
Angola	Huila	Nazara Health Post	Posto de Saúde	MoH
Angola	Huila	Ngelenge Health Post	Posto de Saúde	MoH	-15.5238	14.124	Combination
Angola	Huila	Ngola Health Post	Posto de Saúde	MoH	-14.1322	14.5031	Other
Angola	Huila	Ngungui Health Post	Posto de Saúde	MoH
Angola	Huila	Nohenda Health Post	Posto de Saúde	MoH	-14.958	13.5664	Combination
Angola	Huila	Nombueneno Health Post	Posto de Saúde	MoH	-15.317	13.949	Encarta
Angola	Huila	Nondumbo Health Post	Posto de Saúde	MoH	-14.5676	15.0461	Other
Angola	Huila	Nonjiwe Health Post	Posto de Saúde	MoH	-14.9124	13.5522	Combination
Angola	Huila	Nossa Sra Paz Health Post	Posto de Saúde	MoH	-14.9169	13.4933	Combination
Angola	Huila	Nova Montpo Health Post	Posto de Saúde	MoH
Angola	Huila	Nova Montpo Health Post	Posto de Saúde	MoH
Angola	Huila	Nusse Health Post	Posto de Saúde	MoH	-14.4868	14.7975	Other
Angola	Huila	Oma Health Centre	Centro de Saúde	MoH	-14.662	13.9024	Combination
Angola	Huila	Onculuvale Health Post	Posto de Saúde	MoH
Angola	Huila	P. Zeca Hospital	Hospital	Govt.	-14.914	13.4927	Combination
Angola	Huila	Pangelo Health Post	Posto de Saúde	MoH	-15.9392	13.7127	Other
Angola	Huila	Pioneiro Zeca Hospital	Hospital	Govt.	-14.9257	13.4947	Google Earth
Angola	Huila	Poares Health Post	Posto de Saúde	MoH	-14.8835	13.5374	Combination
Angola	Huila	Pocolo Health Post	Posto de Saúde	MoH	-15.8007	13.8042	Other
Angola	Huila	Que II Health Post	Posto de Saúde	MoH	-13.8169	15.1189	Other
Angola	Huila	Quicuco Health Post	Posto de Saúde	MoH	-14.2667	13.85	Other
Angola	Huila	Quilemba Health Centre	Centro de Saúde	MoH	-14.7775	13.5011	Other
Angola	Huila	Quilengues Municipal Hospital	Municipal Hospital	Govt.	-14.0786	14.0748	Combination
Angola	Huila	Quipungo Municipal Hospital	Municipal Hospital	Govt.	-14.8761	14.1915	Combination
Angola	Huila	Quiteve Health Post	Posto de Saúde	MoH	-15.8797	14.9824	Other
Angola	Huila	Quo Health Post	Posto de Saúde	MoH	-14.4387	14.7957	Other
Angola	Huila	Rio Capitao Health Centre	Centro de Saúde	MoH	-14.9183	13.4899	Combination
Angola	Huila	Rio de Areia Health Post	Posto de Saúde	MoH	-15.6159	14.0586	Other
Angola	Huila	Rio Nangombe Health Post	Posto de Saúde	MoH
Angola	Huila	Rio Unene Health Post	Posto de Saúde	MoH
Angola	Huila	Sanatório Hospital Lubango	Hospital	Govt.	-14.9203	13.4801	Combination
Angola	Huila	Sandje Health Post	Posto de Saúde	MoH	-13.6759	15.7991	Other
Angola	Huila	Sangueve Health Post	Posto de Saúde	MoH	-13.8886	15.8538	Other
Angola	Huila	Sede Health Centre	Centro de Saúde	MoH	-15.0102	13.3804	Other
Angola	Huila	Sede Health Centre	Centro de Saúde	MoH	-14.8267	14.5467	Combination
Angola	Huila	Sede Health Centre	Centro de Saúde	MoH	-14.7381	15.0268	Combination
Angola	Huila	Sede Health Centre	Centro de Saúde	MoH	-14.5027	14.1234	Other
Angola	Huila	Sede Health Centre	Centro de Saúde	MoH	-13.7762	14.6934	Combination
Angola	Huila	Sede Health Centre	Centro de Saúde	MoH	-13.5182	15.189	Other
Angola	Huila	Sede Health Post	Posto de Saúde	MoH	-14.7308	15.0345	Combination
Angola	Huila	Sede Health Post	Posto de Saúde	MoH	-14.7032	16.0381	Combination
Angola	Huila	Sede Health Post	Posto de Saúde	MoH	-13.7965	14.6798	Google Earth
Angola	Huila	Sede I comunal Health Post	Posto de Saúde	MoH	-14.0826	14.0772	Combination
Angola	Huila	Sede I Health Centre	Centro de Saúde	MoH	-14.917	13.5	Other
Angola	Huila	Sede I Health Post	Posto de Saúde	MoH	-15.1865	13.6891	Combination
Angola	Huila	Sede I Health Post	Posto de Saúde	MoH	-15.0065	13.3754	Combination
Angola	Huila	Sede I Health Post	Posto de Saúde	MoH	-14.9157	13.5017	Combination
Angola	Huila	Sede I Health Post	Posto de Saúde	MoH	-14.7341	15.0044	Combination
Angola	Huila	Sede II comunal Health Post	Posto de Saúde	MoH	-14.0697	14.0742	Combination
Angola	Huila	Sede II Health Centre	Centro de Saúde	MoH	-14.9282	13.5223	Google Earth
Angola	Huila	Sede II Health Centre	Centro de Saúde	MoH	-14.0753	14.0745	Combination
Angola	Huila	Sede II Health Post	Posto de Saúde	MoH	-15.1937	13.6834	Combination
Angola	Huila	Sede II Health Post	Posto de Saúde	MoH	-15.0239	13.3826	Combination
Angola	Huila	Sede II Health Post	Posto de Saúde	MoH	-14.9469	13.575	Combination
Angola	Huila	Sede III Health Post	Posto de Saúde	MoH	-15.0365	13.3719	Combination
Angola	Huila	Sendi Health Centre	Centro de Saúde	MoH	-14.6	14.25	Other
Angola	Huila	Sequendiva Health Post	Posto de Saúde	MoH	-15.7186	15.3734	Other
Angola	Huila	Socobal Health Post	Posto de Saúde	MoH
Angola	Huila	Sofrio Health Centre	Centro de Saúde	MoH
Angola	Huila	Taka Health Post	Posto de Saúde	MoH	-16.0634	13.5854	Other
Angola	Huila	Tandavala Health Post	Posto de Saúde	MoH	-14.9149	13.5013	Other
Angola	Huila	Tapo Health Post	Posto de Saúde	MoH	-15.7349	13.8889	Other
Angola	Huila	Tchakaya Health Post	Posto de Saúde	MoH
Angola	Huila	Tchanja Health Post	Posto de Saúde	MoH	-14.9118	13.5007	Other
Angola	Huila	Tchavola Health Post	Posto de Saúde	MoH	-13.7152	14.4879	Other
Angola	Huila	Tchiku Centro Materno Infantil	Centro Materno Infantil	MoH	-15.0376	13.3724	Combination
Angola	Huila	Tchiku Health Post	Posto de Saúde	MoH
Angola	Huila	Tchikuatite Centro Materno Infantil	Centro Materno Infantil	MoH	-15.1953	13.6844	Other
Angola	Huila	Tchikuatite Health Post	Posto de Saúde	MoH	-15.1797	14.1312	Other
Angola	Huila	Tchinguendjo Health Post	Posto de Saúde	MoH	-13.6211	16.3031	Other
Angola	Huila	Tchioco Health Centre	Centro de Saúde	MoH	-14.9343	13.5619	Other
Angola	Huila	Tchipalakassa Health Post	Posto de Saúde	MoH
Angola	Huila	Tchipangula Health Post	Posto de Saúde	MoH
Angola	Huila	Tchipopia Health Post	Posto de Saúde	MoH	-14.8727	14.9217	Other
Angola	Huila	Tchitaqui baixo Health Post	Posto de Saúde	MoH
Angola	Huila	Tchitata Health Post	Posto de Saúde	MoH	-13.6743	15.7125	Other
Angola	Huila	Tchituli Health Post	Posto de Saúde	MoH	-14.4687	13.8518	Other
Angola	Huila	Tchituto Health Post	Posto de Saúde	MoH
Angola	Huila	Tchiueca Health Post	Posto de Saúde	MoH	-13.5535	15.0441	Other
Angola	Huila	Tchivinguilo Complex Health Post	Posto de Saúde	MoH	-15.1651	13.3044	Other
Angola	Huila	Tchombulo Health Post	Posto de Saúde	MoH	-15.048	13.545	Combination
Angola	Huila	Tchunbangombe Health Post	Posto de Saúde	MoH
Angola	Huila	Toco Health Post	Posto de Saúde	MoH	-14.7809	13.7771	Other
Angola	Huila	Tucondoca Health Post	Posto de Saúde	MoH
Angola	Huila	Ukali Povoatpo Health Post	Posto de Saúde	MoH	-13.9262	14.0388	Other
Angola	Huila	Upalo Health Post	Posto de Saúde	MoH
Angola	Huila	Valodia Health Post	Posto de Saúde	MoH	-14.7708	16.1209	Other
Angola	Huila	Vatuco Health Post	Posto de Saúde	MoH	-13.9411	14.6145	Other
Angola	Huila	Viamba Health Post	Posto de Saúde	MoH	-14.4052	14.2105	Other
Angola	Huila	Vihonge Health Post	Posto de Saúde	MoH	-14.6373	16.0892	Other
Angola	Huila	Vikenge Health Post	Posto de Saúde	MoH
Angola	Huila	Vila branca Health Post	Posto de Saúde	MoH	-14.02	14.5785	Other
Angola	Huila	Vila Paula Health Post	Posto de Saúde	MoH	-14.8819	13.5729	Other
Angola	Huila	Vila Real Health Post	Posto de Saúde	MoH	-14.0616	15.0757	Other
Angola	Huila	Vionga Health Post	Posto de Saúde	MoH	-13.8194	14.755	Other
Angola	Huila	Viopio Health Post	Posto de Saúde	MoH	-14.2995	14.8518	Other
Angola	Huila	Viriambundo Health Post	Posto de Saúde	MoH	-15.55	14.05	Other
Angola	Huila	Vissaca Health Post	Posto de Saúde	MoH	-14.8961	14.9744	Other
Angola	Huila	Viti vivale Health Post	Posto de Saúde	MoH
Angola	Huila	Vombo Health Post	Posto de Saúde	MoH	-14.05	13.7667	Other
Angola	Huila	Waba Health Post	Posto de Saúde	MoH	-13.7991	14.8715	Other
Angola	Huila	Waya Health Post	Posto de Saúde	MoH
Angola	Huila	Yoba Health Post	Posto de Saúde	MoH
Angola	Huila	Yumbi Health Post	Posto de Saúde	MoH	-13.7972	14.9495	Other
Angola	Kuango Kubango	Consol Provincial de Kuango Kubango	Provincial Hospital	Govt.	-14.6601	17.6988	Google Earth
Angola	Kuango Kubango	Hospital Municipal do Kuvango	Municipal Hospital	Govt.	-14.3699	16.4957	Google Earth
Angola	Luanda	Hospital Américo Boavida	Hospital	Govt.	-8.8242	13.2577	Google Earth
Angola	Luanda	Hospital Do Prenda	Hospital	Govt.	-8.83246	13.2221	Google Earth
Angola	Luanda	Hospital dos Cajueiros	Hospital	Govt.	-8.82461	13.2791	Google Earth
Angola	Luanda	Hospital Geral Camama	General Hospital	Govt.	-8.91692	13.26	Google Earth
Angola	Luanda	Hospital Geral Kilamba Kiaxi	General Hospital	Govt.	-8.84953	13.2581	Google Earth
Angola	Luanda	Hospital Josina Machel	Hospital	Govt.	-8.82346	13.2245	Google Earth
Angola	Luanda	Hospital Municipal de Luanda	Municipal Hospital	Govt.	-8.85383	13.2947	Google Earth
Angola	Luanda	Hospital Neves Bendinha	Hospital	Govt.	-8.8404	13.2581	Google Earth
Angola	Luanda	Hospital Sanatório	Hospital	Govt.	-8.8613	13.2835	Google Earth
Angola	Lunda Norte	Hospital Municipal de Cafunfo	Municipal Hospital	Govt.	-8.77347	17.9848	Google Earth
Angola	Lunda Norte	Hospital Municipal de Lucapa	Municipal Hospital	Govt.	-8.42629	20.7357	Google Earth
Angola	Lunda Norte	Hospital Municipal de Nzagi Cambulo	Municipal Hospital	Govt.	-7.68392	21.3561	Google Earth
Angola	Lunda Norte	Hospital Provincial da Luanda Norte	Provincial Hospital	Govt.	-8.68064	18.9092	Google Earth
Angola	Lunda Sul	Consol Provincial de Luanda Sul	Provincial Hospital	Govt.	-9.67094	20.388	Google Earth
Angola	Malanje	Amaral Health Post	Posto de Saúde	MoH	-9.26581	15.9423	Other
Angola	Malanje	Bangalas Health Post	Posto de Saúde	MoH
Angola	Malanje	Bembo Health Post	Posto de Saúde	MoH	-10.2397	16.9086	Other
Angola	Malanje	Bola Casaxe Health Post	Posto de Saúde	MoH	-9.81737	16.647	Other
Angola	Malanje	Bumba Health Post	Posto de Saúde	MoH	-9.57069	16.2673	Other
Angola	Malanje	Bundo Health Post	Posto de Saúde	MoH	-10.9651	17.5746	Combination
Angola	Malanje	Cabata Muhongo Health Post	Posto de Saúde	MoH	-8.5999	15.7059	Other
Angola	Malanje	Caculama Municipal Hospital	Municipal Hospital	Govt.	-9.48333	16.85	Other
Angola	Malanje	Cacuso Centro Materno Infantil	Centro Materno Infantil	MoH	-9.43834	16.1519	Other
Angola	Malanje	Camatende Health Post	Posto de Saúde	MoH	-9.58067	16.2788	Other
Angola	Malanje	Camatete Health Post	Posto de Saúde	MoH	-9.58216	16.4267	Other
Angola	Malanje	Cambaxe Health Post	Posto de Saúde	MoH	-9.41018	16.4893	Other
Angola	Malanje	Cambo Camana Health Post	Posto de Saúde	MoH	-8.84802	16.6403	Other
Angola	Malanje	Cambondo Health Post	Posto de Saúde	MoH	-9.48742	16.5432	Other
Angola	Malanje	Cambunze Health Post	Posto de Saúde	MoH	-9.394	15.6469	Other
Angola	Malanje	Cameme Health Post	Posto de Saúde	MoH	-8.03665	16.3411	Combination
Angola	Malanje	Campo Cafuxi Health Post	Posto de Saúde	MoH	-9.2433	17.1704	Other
Angola	Malanje	Canambua Health Centre	Centro de Saúde	MoH	-9.56527	16.3549	Other
Angola	Malanje	Cangambo Health Centre	Centro de Saúde	MoH	-9.52347	16.309	Other
Angola	Malanje	Cangandala Municipal Health Centre	Centro de Saúde	MoH	-9.78668	16.4318	Other
Angola	Malanje	Cangando Health Post	Posto de Saúde	MoH	-9.58925	16.2216	Other
Angola	Malanje	Canjila Health Post	Posto de Saúde	MoH
Angola	Malanje	Capele Health Post	Posto de Saúde	MoH	-8.4957	16.0073	Other
Angola	Malanje	Capunda Health Post	Posto de Saúde	MoH	-10.7613	17.9447	Other
Angola	Malanje	Caribo Health Post	Posto de Saúde	MoH	-9.65592	16.6751	Other
Angola	Malanje	Casa Gaiato Health Post	Posto de Saúde	MoH	-9.51489	16.2707	Combination
Angola	Malanje	Catala Health Post	Posto de Saúde	MoH	-9.46667	16.7167	Other
Angola	Malanje	Cateco Cangola Health Post	Posto de Saúde	MoH	-8.46245	15.8263	Other
Angola	Malanje	Caxinga Health Post	Posto de Saúde	MoH	-9.54306	17.0228	Other
Angola	Malanje	Caxito Health Post	Posto de Saúde	MoH	-8.75161	15.8116	Other
Angola	Malanje	Chindingo Health Post	Posto de Saúde	MoH
Angola	Malanje	Chiquita Health Post	Posto de Saúde	MoH	-8.63445	16.9599	Other
Angola	Malanje	Cibanga Health Post	Posto de Saúde	MoH	-8.48177	16.0502	Other
Angola	Malanje	Cota Health Post	Posto de Saúde	MoH	-9.26429	16.0986	Other
Angola	Malanje	Culamagia Health Post	Posto de Saúde	MoH	-9.80404	16.8967	Combination
Angola	Malanje	Dala Samba Health Post	Posto de Saúde	MoH	-8.12053	16.7385	Other
Angola	Malanje	Damba Health Post	Posto de Saúde	MoH	-9.38601	16.7287	Other
Angola	Malanje	Dombo Health Post	Posto de Saúde	MoH	-11.0026	17.816	Other
Angola	Malanje	Dori Lombe Health Post	Posto de Saúde	MoH	-9.53744	16.1444	Other
Angola	Malanje	Dos Kapuchinhos Health Centre	Centro de Saúde	MoH	-9.49779	16.2676	Combination
Angola	Malanje	Dumba Cabango Health Post	Posto de Saúde	MoH	-10.1562	17.2011	Other
Angola	Malanje	Fazenda Holanda Health Post	Posto de Saúde	MoH	-9.7	15.4167	Other
Angola	Malanje	Joao Pascoal Health Post	Posto de Saúde	MoH	-9.08896	15.9582	Combination
Angola	Malanje	K. Katembo Municipal Hospital	Municipal Hospital	Govt.	-10.0713	17.5372	Other
Angola	Malanje	Kahala Health Centre	Centro de Saúde	MoH	-9.53051	16.4023	Combination
Angola	Malanje	Kahombo Municipal Hospital	Municipal Hospital	Govt.	-8.69289	16.5224	Other
Angola	Malanje	Kalandula Municipal Hospital	Municipal Hospital	Govt.	-9.08727	15.9607	Other
Angola	Malanje	Kambo Sunjinji Health Post	Posto de Saúde	MoH	-8.82322	16.7993	Other
Angola	Malanje	Kambundi de Kuije Health Post	Posto de Saúde	MoH	-9.63907	16.3315	Other
Angola	Malanje	Katepa Health Centre	Centro de Saúde	MoH	-9.56176	16.3348	Combination
Angola	Malanje	Kela Municipal Hospital	Municipal Hospital	Govt.	-9.26577	17.086	Other
Angola	Malanje	Kifucussa Health Post	Posto de Saúde	MoH	-9.31291	16.4696	Other
Angola	Malanje	Kimbamba Health Post	Posto de Saúde	MoH	-9.5196	16.3238	Combination
Angola	Malanje	Kingles Health Post	Posto de Saúde	MoH
Angola	Malanje	Kingongo Health Post	Posto de Saúde	MoH
Angola	Malanje	Kissanga ya Teca	Posto de Saúde	MoH	-8.35818	17.0234	Other
Angola	Malanje	Kitapa Health Post	Posto de Saúde	MoH	-10.0811	17.555	Other
Angola	Malanje	Kiwaba Nzogi Municipal Hospital	Municipal Hospital	Govt.	-8.95	16.5	Other
Angola	Malanje	Kizanga Health Centre	Centro de Saúde	MoH	-9.54185	16.3392	Combination
Angola	Malanje	Kuale Health Post	Posto de Saúde	MoH	-8.35148	16.1631	Other
Angola	Malanje	Kunda Dia Baze Municipal Hospital	Municipal Hospital	Govt.	-8.9	17.0667	Other
Angola	Malanje	Lau Health Post	Posto de Saúde	MoH	-9.45823	16.3487	Other
Angola	Malanje	Lau Health Post	Posto de Saúde	MoH	-9.4191	16.3358	Other
Angola	Malanje	Lemba Health Post	Posto de Saúde	MoH	-8.7811	17.2433	Other
Angola	Malanje	Lemba Health Post	Posto de Saúde	MoH	-8.77439	17.2459	Other
Angola	Malanje	Lombe Health Post	Posto de Saúde	MoH	-9.48675	16.1528	Other
Angola	Malanje	Lukembo Municipal Hospital	Municipal Hospital	Govt.	-10.7319	17.72	Other
Angola	Malanje	Lutau Health Post	Posto de Saúde	MoH	-9.0833	16.4322	Other
Angola	Malanje	Malanje Centro Materno Infantil	Centro Materno Infantil	MoH	-9.5354	16.3259	Other
Angola	Malanje	Malanje Health Centre	Centro de Saúde	MoH	-9.54514	16.3547	Other
Angola	Malanje	Mangando Health Post	Posto de Saúde	MoH	-8.04531	17.129	Other
Angola	Malanje	Maquina Health Post	Posto de Saúde	MoH	-9.2667	17.0833	Other
Angola	Malanje	Maquina Health Post	Posto de Saúde	MoH	-8.66813	17.3647	Other
Angola	Malanje	Marimba Municipal Hospital	Municipal Hospital	Govt.	-8.35869	17.0259	Other
Angola	Malanje	Massango Municipal Hospital	Municipal Hospital	Govt.	-8.03178	16.3467	Other
Angola	Malanje	Matete Health Post	Posto de Saúde	MoH	-9.4676	15.8925	Other
Angola	Malanje	Maxinde Health Centre	Centro de Saúde	MoH	-9.5168	16.2425	Other
Angola	Malanje	Mbambi Health Post	Posto de Saúde	MoH	-9.53125	16.2523	Other
Angola	Malanje	Medile Health Post	Posto de Saúde	MoH	-9.13078	16.5045	Other
Angola	Malanje	Mikanda Health Post	Posto de Saúde	MoH	-8.50564	16.3715	Other
Angola	Malanje	Milando Health Post	Posto de Saúde	MoH	-8.8203	17.5511	Other
Angola	Malanje	Milando Health Post	Posto de Saúde	MoH	-8.81272	17.5551	Other
Angola	Malanje	Missao Catolica Health Post	Posto de Saúde	MoH	-9.18033	17.0704	Google Earth
Angola	Malanje	Missao Catolica Health Post	Posto de Saúde	MoH	-9.08978	15.9551	Google Earth
Angola	Malanje	Mola Health Post	Posto de Saúde	MoH	-8.78569	16.3409	Other
Angola	Malanje	Moma Health Post	Posto de Saúde	MoH	-9.72946	17.3897	Other
Angola	Malanje	Mufuma 1 Health Post	Posto de Saúde	MoH	-9.1942	16.4869	Other
Angola	Malanje	Mufuma 2 Health Post	Posto de Saúde	MoH	-10.676	17.3685	Other
Angola	Malanje	Muhenba Health Post	Posto de Saúde	MoH	-9.5745	16.2282	Other
Angola	Malanje	Muondo Health Post	Posto de Saúde	MoH	-9.00998	15.7517	Other
Angola	Malanje	Muquixe Health Post	Posto de Saúde	MoH	-9.5	16.65	Other
Angola	Malanje	Mussolo Health Post	Posto de Saúde	MoH	-10	17.3333	Other
Angola	Malanje	Mussongo Health Post	Posto de Saúde	MoH	-8.03169	16.3451	Other
Angola	Malanje	Nbanja Ngola Health Post	Posto de Saúde	MoH	-8.69546	16.52	Combination
Angola	Malanje	Ndalango Nzamba Health Post	Posto de Saúde	MoH	-9.0633	16.2901	Other
Angola	Malanje	Ngola Luige Health Post	Posto de Saúde	MoH	-9.25291	16.3675	Other
Angola	Malanje	Ngondo Health Post	Posto de Saúde	MoH	-9.63766	16.1751	Other
Angola	Malanje	Ngunga Palanca Health Post	Posto de Saúde	MoH	-11.0322	17.8845	Other
Angola	Malanje	Nhangue Health Post	Posto de Saúde	MoH	-8.62847	16.2568	Other
Angola	Malanje	Pipa Health Post	Posto de Saúde	MoH	-9.29701	16.2362	Other
Angola	Malanje	Pungo Andongo Health Post	Posto de Saúde	MoH	-9.67043	15.588	Other
Angola	Malanje	Quessua Health Post	Posto de Saúde	MoH	-9.46849	16.2952	Other
Angola	Malanje	Queximenha Health Post	Posto de Saúde	MoH	-9.42354	15.7427	Combination
Angola	Malanje	Quihuhu Health Post	Posto de Saúde	MoH	-7.74356	16.5976	Other
Angola	Malanje	Quimbamba Health Post	Posto de Saúde	MoH	-9.33697	16.323	Other
Angola	Malanje	Quimbanda Health Post	Posto de Saúde	MoH	-8.2456	16.439	Other
Angola	Malanje	Quimbango Health Post	Posto de Saúde	MoH	-10.8895	18.0959	Other
Angola	Malanje	Quinguengue Health Post	Posto de Saúde	MoH	-7.63676	16.9604	Other
Angola	Malanje	Quinje Health Post	Posto de Saúde	MoH	-9.08454	15.6818	Other
Angola	Malanje	Quirima Municipal Hospital	Municipal Hospital	Govt.	-10.8926	18.0911	Other
Angola	Malanje	Quissaco Health Post	Posto de Saúde	MoH	-9.54303	16.1805	Other
Angola	Malanje	Quissol Health Post	Posto de Saúde	MoH	-9.58432	16.4629	Other
Angola	Malanje	Quissua 1 Health Post	Posto de Saúde	MoH	-9.09406	16.6022	Other
Angola	Malanje	Quitala Banza Health Post	Posto de Saúde	MoH	-7.66667	16.3667	Other
Angola	Malanje	Quitumbo Health Post	Posto de Saúde	MoH	-8.92367	15.8063	Other
Angola	Malanje	Quizenga Health Post	Posto de Saúde	MoH	-9.36071	15.4698	Other
Angola	Malanje	Rimba Health Post	Posto de Saúde	MoH	-10.8941	18.0837	Combination
Angola	Malanje	Ritondo Health Centre	Centro de Saúde	MoH	-9.517	16.366	Encarta
Angola	Malanje	Sagrado Coratpo de Jesus Health Centre	Centro de Saúde	MoH	-9.55635	16.3431	Combination
Angola	Malanje	Sandala Health Post	Posto de Saúde	MoH	-11.0311	18.3124	Other
Angola	Malanje	Santa Maria Health Post	Posto de Saúde	MoH	-8.9489	16.0178	Other
Angola	Malanje	Sautar Health Post	Posto de Saúde	MoH	-11.1899	18.4399	Other
Angola	Malanje	Sector Kwanza Health Post	Posto de Saúde	MoH	-9.66029	16.6754	Other
Angola	Malanje	Soqueco Health Post	Posto de Saúde	MoH	-9.24953	15.8095	Other
Angola	Malanje	Suinge Health Post	Posto de Saúde	MoH	-9.6396	16.3972	Other
Angola	Malanje	Tala Mungongo Health Post	Posto de Saúde	MoH	-9.71043	17.2288	Other
Angola	Malanje	Tamba Health Post	Posto de Saúde	MoH	-9.67577	16.4031	Other
Angola	Malanje	Vila Matilde Health Centre	Centro de Saúde	MoH	-9.54483	16.3645	Combination
Angola	Malanje	Vula Ngombe Health Post	Posto de Saúde	MoH	-9.62928	16.2495	Other
Angola	Malanje	Xandel Health Post	Posto de Saúde	MoH	-9.38333	17.2	Other
Angola	Malanje	Zanga Health Post	Posto de Saúde	MoH	-9.48605	15.9981	Other
Angola	Malanje	Zungue Health Post	Posto de Saúde	MoH	-9.534	17.165	Encarta
Angola	Moxico	Hospital Provincial de Moxíco	Provincial Hospital	Govt.	-11.7915	19.9057	Google Earth
Angola	Namibe	Camucuio Hospital	Hospital	Govt.	-14.1048	13.2419	Combination
Angola	Namibe	Saco Mar Hospital	Hospital	Govt.	-15.1184	12.1477	Combination
Angola	Namibe	Sanatório Hospital Moçamedes	Hospital	Govt.	-15.2006	12.1431	Combination
Angola	Namibe	Tombua Municipal Hospital	Municipal Hospital	Govt.	-15.8054	11.8473	Combination
Angola	Namibe	Virei Municipal Hospital	Municipal Hospital	Govt.	-15.7253	12.949	Combination
Angola	Uige	14 de Abril Health Post	Posto de Saúde	MoH	-6.68348	15.1379	Other
Angola	Uige	Aldeia Vissosa Health Centre	Centro de Saúde	MoH	-8.10151	14.9564	Google Earth
Angola	Uige	Alfandega Health Centre	Centro de Saúde	MoH	-7.30614	15.9898	Other
Angola	Uige	Alto Zaza Health Post	Posto de Saúde	MoH	-6.6211	16.9333	Other
Angola	Uige	Ambufla Health Centre	Centro de Saúde	MoH	-7.433	14.65	Other
Angola	Uige	B.Lucunga Health Post	Posto de Saúde	MoH	-7.56715	15.2791	Other
Angola	Uige	Bamba Health Centre	Centro de Saúde	MoH	-7.7557	15.2648	Combination
Angola	Uige	Banza Congo Health Post	Posto de Saúde	MoH	-7.33333	15.3667	Other
Angola	Uige	Banza lenda Health Post	Posto de Saúde	MoH	-7.21667	14.7	Other
Angola	Uige	Banza Luanda Health Post	Posto de Saúde	MoH	-7.35506	14.8579	Combination
Angola	Uige	Banza Polo Health Centre	Centro de Saúde	MoH	-6.2933	15.4811	Other
Angola	Uige	Bau 20 Health Post	Posto de Saúde	MoH	-7.3	14.8167	Other
Angola	Uige	Bela Vista Health Post	Posto de Saúde	MoH	-7.52674	14.3522	Other
Angola	Uige	Bembe Health Centre	Centro de Saúde	MoH	-7.01559	14.303	Other
Angola	Uige	Bengo Health Centre	Centro de Saúde	MoH	-7.97388	15.8511	Combination
Angola	Uige	Bengo Health Post	Posto de Saúde	MoH	-7.79719	15.2815	Other
Angola	Uige	Beu Health Centre	Centro de Saúde	MoH	-6.23151	15.47	Other
Angola	Uige	Bonde Health Post	Posto de Saúde	MoH	-6.85672	14.5615	Other
Angola	Uige	Buengas Municipal Hospital	Municipal Hospital	Govt.	-6.73155	15.903	Other
Angola	Uige	Buengas Sul Health Centre	Centro de Saúde	MoH	-6.99239	16.0177	Other
Angola	Uige	Bula kalonge Health Post	Posto de Saúde	MoH	-7.7111	16.0201	Other
Angola	Uige	Bungo Health Post	Posto de Saúde	MoH	-7.43192	15.389	Other
Angola	Uige	Bungo Municipal Hospital	Municipal Hospital	Govt.	-7.43162	15.386	Other
Angola	Uige	Cabala Health Post	Posto de Saúde	MoH	-7.75	15.2333	Other
Angola	Uige	Cahondo Health Post	Posto de Saúde	MoH
Angola	Uige	Caindo Health Post	Posto de Saúde	MoH	-7.1403	15.3288	Other
Angola	Uige	Caiongo Health Centre	Centro de Saúde	MoH	-7.73813	15.9162	Other
Angola	Uige	Caiongo Health Post	Posto de Saúde	MoH	-7.73333	15.9167	Other
Angola	Uige	Calumbo Health Post	Posto de Saúde	MoH	-7.68333	15.1167	Other
Angola	Uige	Camancoco Health Post	Posto de Saúde	MoH	-7.44816	15.0976	Other
Angola	Uige	Camatambo Health Post	Posto de Saúde	MoH	-6.5037	15.3179	Other
Angola	Uige	Cambamba Health Post	Posto de Saúde	MoH	-8.16492	14.7686	Other
Angola	Uige	Cambila Health Post	Posto de Saúde	MoH	-7.57214	15.0715	Other
Angola	Uige	Cangola Centro Materno Infantil	Centro Materno Infantil	MoH	-7.96667	15.85	Other
Angola	Uige	Cangulo Health Post	Posto de Saúde	MoH	-7.68543	15.2896	Other
Angola	Uige	Cangundo Health Centre	Centro de Saúde	MoH	-7.76667	15.2333	Other
Angola	Uige	Cari Health Post	Posto de Saúde	MoH	-7.62747	15.1251	Other
Angola	Uige	Casseche Health Post	Posto de Saúde	MoH	-7.57618	14.9658	Other
Angola	Uige	Catambi Health Post	Posto de Saúde	MoH	-7.53943	15.1472	Other
Angola	Uige	Catuhula Health Post	Posto de Saúde	MoH	-7.57215	15.1199	Combination
Angola	Uige	Catulo Health Post	Posto de Saúde	MoH	-8.13333	15.1667	Other
Angola	Uige	Caua Feira Health Centre	Centro de Saúde	MoH	-7.76384	15.2671	Other
Angola	Uige	Cavunga Health Post	Posto de Saúde	MoH	-7.61667	15.2167	Other
Angola	Uige	Cavunga Health Post	Posto de Saúde	MoH	-7.32218	14.9648	Other
Angola	Uige	Cawa Grande Health Centre	Centro de Saúde	MoH	-7.75699	15.2755	Other
Angola	Uige	Cawenda Health Post	Posto de Saúde	MoH	-7.66667	15.3333	Other
Angola	Uige	Cawessa Health Post	Posto de Saúde	MoH
Angola	Uige	Caxinga Health Post	Posto de Saúde	MoH	-7.69756	15.6566	Combination
Angola	Uige	Cazanga Health Post	Posto de Saúde	MoH	-7.85	15.2833	Other
Angola	Uige	Cazumbi Health Post	Posto de Saúde	MoH	-6.67788	15.1253	Other
Angola	Uige	Colua Health Post	Posto de Saúde	MoH	-8.01667	14.8167	Other
Angola	Uige	Cuale Health Post	Posto de Saúde	MoH	-7.8941	15.0413	Other
Angola	Uige	Cuango Health Post	Posto de Saúde	MoH	-6.27754	16.7072	Other
Angola	Uige	Cuilo Cambozo Health Centre	Centro de Saúde	MoH
Angola	Uige	Cuilo Pombo Health Centre	Centro de Saúde	MoH	-7.2	15.717	Other
Angola	Uige	Culo Health Post	Posto de Saúde	MoH	-7.69251	15.2206	Other
Angola	Uige	Culo Health Post	Posto de Saúde	MoH	-6.98333	14.3833	Other
Angola	Uige	Cunga Quiximba Health Post	Posto de Saúde	MoH	-7.61328	14.9875	Other
Angola	Uige	Cungo Health Post	Posto de Saúde	MoH	-7.23001	15.3475	Other
Angola	Uige	Cungula Health Post	Posto de Saúde	MoH	-7.58462	15.1738	Other
Angola	Uige	Cunso-Muxinga Health Post	Posto de Saúde	MoH	-7.23376	15.3447	Other
Angola	Uige	Dala Health Post	Posto de Saúde	MoH	-7.8	15.3667	Other
Angola	Uige	Damba Municipal Hospital	Municipal Hospital	Govt.	-6.68155	15.136	Other
Angola	Uige	Dambi Health Post	Posto de Saúde	MoH	-7.7733	15.1704	Other
Angola	Uige	Denga Health Post	Posto de Saúde	MoH	-7.3	14.9667	Other
Angola	Uige	Dimuca Health Centre	Centro de Saúde	MoH	-7.88333	15.5	Other
Angola	Uige	Gando Health Post	Posto de Saúde	MoH	-7.58761	15.0743	Combination
Angola	Uige	Gombe Health Centre	Centro de Saúde	MoH	-7.46667	15.3667	Other
Angola	Uige	Goule Health Post	Posto de Saúde	MoH
Angola	Uige	Gunga Cruz Health Post	Posto de Saúde	MoH	-7.5934	15.1234	Combination
Angola	Uige	Gunza Health Post	Posto de Saúde	MoH	-7.968	15.8511	Other
Angola	Uige	Gunza Health Post	Posto de Saúde	MoH	-7.60966	14.4157	Other
Angola	Uige	Gunza Health Post	Posto de Saúde	MoH	-7.52419	14.9365	Other
Angola	Uige	Henda Health Post	Posto de Saúde	MoH	-7.61941	15.1101	Other
Angola	Uige	Hinda Health Post	Posto de Saúde	MoH	-7.44194	15.3856	Other
Angola	Uige	Hoji-ya-Henda Health Post	Posto de Saúde	MoH	-7.9225	15.7788	Other
Angola	Uige	Icoca Health Post	Posto de Saúde	MoH	-6.19982	16.2008	Other
Angola	Uige	Kanga Health Post	Posto de Saúde	MoH
Angola	Uige	Kaniki Health Post	Posto de Saúde	MoH	-7.67043	14.4051	Combination
Angola	Uige	Kassanda Health Post	Posto de Saúde	MoH	-6.47849	16.1777	Other
Angola	Uige	Kaunda Health Post	Posto de Saúde	MoH
Angola	Uige	Kibakata Health Post	Posto de Saúde	MoH
Angola	Uige	Kibala Health Post	Posto de Saúde	MoH
Angola	Uige	Kibula Mala Health Post	Posto de Saúde	MoH	-6.55181	16.1671	Other
Angola	Uige	Kiluvualo Health Post	Posto de Saúde	MoH
Angola	Uige	Kimvemba Health Post	Posto de Saúde	MoH
Angola	Uige	Kindundu Health Post	Posto de Saúde	MoH	-7.00349	14.343	Combination
Angola	Uige	Kinefoto Health Post	Posto de Saúde	MoH
Angola	Uige	Kingonga Health Post	Posto de Saúde	MoH	-7.41982	14.9719	Other
Angola	Uige	Kinkosi Ngundo Health Post	Posto de Saúde	MoH
Angola	Uige	Kintino Health Post	Posto de Saúde	MoH
Angola	Uige	Kipaka Health Post	Posto de Saúde	MoH
Angola	Uige	Kitsamba Ndelez Health Post	Posto de Saúde	MoH	-7.02114	15.1183	Combination
Angola	Uige	Kizele Health Post	Posto de Saúde	MoH
Angola	Uige	Kiziza K. Health Post	Posto de Saúde	MoH
Angola	Uige	Kussumbani Health Post	Posto de Saúde	MoH	-7.27727	15.0657	Combination
Angola	Uige	Kuximana Health Post	Posto de Saúde	MoH	-6.0452	15.1135	Combination
Angola	Uige	Lambu Health Post	Posto de Saúde	MoH	-7.30564	14.4302	Combination
Angola	Uige	Lemba Health Post	Posto de Saúde	MoH	-6.46667	15.2833	Other
Angola	Uige	Longe Zeca Health Post	Posto de Saúde	MoH	-7.99205	15.5309	Other
Angola	Uige	Lucalo Health Post	Posto de Saúde	MoH	-6.15532	15.4099	Other
Angola	Uige	Lucunga Health Centre	Centro de Saúde	MoH	-6.817	14.6	Other
Angola	Uige	Lukumungo Health Post	Posto de Saúde	MoH	-7.07973	14.7401	Combination
Angola	Uige	Luozi Health Post	Posto de Saúde	MoH
Angola	Uige	Lutanda Health Post	Posto de Saúde	MoH	-7.18333	15.1167	Other
Angola	Uige	Luzuanda Health Post	Posto de Saúde	MoH	-6.68297	15.1788	Other
Angola	Uige	Mabaia Health Post	Posto de Saúde	MoH	-7.45068	15.0954	Other
Angola	Uige	Macanda Health Post	Posto de Saúde	MoH	-6.4688	14.9237	Other
Angola	Uige	Macoco Health Post	Posto de Saúde	MoH	-6.9564	14.6322	Other
Angola	Uige	Macocola Health Centre	Centro de Saúde	MoH	-6.9811	16.1433	Other
Angola	Uige	Macolo Health Post	Posto de Saúde	MoH	-7.0899	16.7433	Other
Angola	Uige	Maianga Health Post	Posto de Saúde	MoH	-7.59319	14.3853	Other
Angola	Uige	Malele Health Post	Posto de Saúde	MoH	-6.27739	15.0664	Combination
Angola	Uige	Malundo Cassumba Health Post	Posto de Saúde	MoH	-7.76667	15.7333	Other
Angola	Uige	Maquela do Zombo Municipal Hospital	Municipal Hospital	Govt.	-6.0655	15.103	Other
Angola	Uige	Maquila Health Post	Posto de Saúde	MoH	-7.3447	16.0315	Other
Angola	Uige	Marinda Health Post	Posto de Saúde	MoH	-7.6852	15.9923	Other
Angola	Uige	Massawu Health Centre	Centro de Saúde	MoH	-7.2333	16.9202	Other
Angola	Uige	Masseque Health Post	Posto de Saúde	MoH	-5.96297	14.9575	Other
Angola	Uige	Mavoio Health Post	Posto de Saúde	MoH	-6.06578	15.0958	Combination
Angola	Uige	Mayengo Health Post	Posto de Saúde	MoH	-7.35534	14.8557	Combination
Angola	Uige	Mbanza Luanda Health Post	Posto de Saúde	MoH	-7.48128	16.0585	Other
Angola	Uige	Mbanza Nsosso Health Post	Posto de Saúde	MoH	-5.89339	15.2276	Other
Angola	Uige	Mbanza Polo Health Post	Posto de Saúde	MoH	-7.60842	15.0832	Other
Angola	Uige	Miguel Health Post	Posto de Saúde	MoH	-7.6	16.0333	Other
Angola	Uige	Misspo Health Post	Posto de Saúde	MoH	-6.67548	15.1281	Other
Angola	Uige	Mongo Vunda Health Post	Posto de Saúde	MoH	-7.25701	15.9169	Other
Angola	Uige	Mpambo Matambo Health Post	Posto de Saúde	MoH
Angola	Uige	Mpambo Nzambi Health Post	Posto de Saúde	MoH	-6.9523	14.4328	Other
Angola	Uige	Mucaba Health Centre	Centro de Saúde	MoH	-7.2656	15.086	Other
Angola	Uige	Mucaba Municipal Hospital	Municipal Hospital	Govt.	-7.26346	15.0777	Other
Angola	Uige	Muenga Health Post	Posto de Saúde	MoH	-7.55	15.1667	Other
Angola	Uige	Mulamba I Health Post	Posto de Saúde	MoH	-7.37676	15.1831	Other
Angola	Uige	Mulamba II Health Post	Posto de Saúde	MoH	-7.34878	15.1767	Other
Angola	Uige	Mussenga Health Post	Posto de Saúde	MoH	-7.1842	15.1722	Other
Angola	Uige	Mutai Health Post	Posto de Saúde	MoH	-6.34278	15.0616	Other
Angola	Uige	Mutoi Health Post	Posto de Saúde	MoH	-7.66677	15.1956	Combination
Angola	Uige	Muzombo Health Post	Posto de Saúde	MoH
Angola	Uige	Ndomba Tadila I Health Post	Posto de Saúde	MoH	-6.05926	15.1059	Other
Angola	Uige	Ndomba Tadila II Health Post	Posto de Saúde	MoH	-5.96913	14.9217	Other
Angola	Uige	Negage Centro Materno Infantil	Centro Materno Infantil	MoH	-7.76667	15.2667	Other
Angola	Uige	Negage Municipal Hospital	Municipal Hospital	Govt.	-7.76565	15.27	Other
Angola	Uige	Ninho Health Post	Posto de Saúde	MoH
Angola	Uige	Nkusso Health Post	Posto de Saúde	MoH
Angola	Uige	Nlanda Health Post	Posto de Saúde	MoH	-7.0722	14.5013	Other
Angola	Uige	Nsangui Health Post	Posto de Saúde	MoH	-6.0699	15.2093	Other
Angola	Uige	Nsosso Health Post	Posto de Saúde	MoH	-6.88847	15.3188	Other
Angola	Uige	Nsundi Health Post	Posto de Saúde	MoH	-6.9711	14.8111	Other
Angola	Uige	Ntaya Health Post	Posto de Saúde	MoH	-6.06932	15.0937	Combination
Angola	Uige	Nzadi Health Post	Posto de Saúde	MoH
Angola	Uige	Nzunga Health Post	Posto de Saúde	MoH	-6.64009	15.0071	Other
Angola	Uige	P.C.Velho Health Post	Posto de Saúde	MoH	-7.63337	15.0696	Combination
Angola	Uige	Pambo Centro Materno Infantil	Centro Materno Infantil	MoH	-7.19065	15.7103	Other
Angola	Uige	Pandamenanga Health Post	Posto de Saúde	MoH
Angola	Uige	Papelpo Health Post	Posto de Saúde	MoH	-7.59853	15.0502	Other
Angola	Uige	Pedreira Centro Materno Infantil	Centro Materno Infantil	MoH	-7.62279	15.0763	Other
Angola	Uige	Pique Health Post	Posto de Saúde	MoH	-7.7767	15.1833	Other
Angola	Uige	Povo Luanda Health Post	Posto de Saúde	MoH	-7.64321	15.1669	Other
Angola	Uige	Povo Mateus Health Post	Posto de Saúde	MoH	-7.57396	15.125	Other
Angola	Uige	Pumba Health Centre	Centro de Saúde	MoH	-7.75625	15.2707	Other
Angola	Uige	Pumba Health Post	Posto de Saúde	MoH	-7.6478	15.4542	Other
Angola	Uige	Puri Centro Materno Infantil	Centro Materno Infantil	MoH	-7.69285	15.6586	Other
Angola	Uige	Puri Municipal Hospital	Municipal Hospital	Govt.	-7.68164	15.653	Other
Angola	Uige	Quatro de Fevereiro Health Post	Posto de Saúde	MoH	-6.44401	15.6152	Other
Angola	Uige	Quianga Health Post	Posto de Saúde	MoH	-7.45	15.85	Other
Angola	Uige	Quibaba Health Centre	Centro de Saúde	MoH	-7.61667	15.7167	Other
Angola	Uige	Quibianga Health Post	Posto de Saúde	MoH	-7.52171	15.0891	Other
Angola	Uige	Quibokolo Health Centre	Centro de Saúde	MoH	-6.51771	16.2149	Other
Angola	Uige	Quibokolo Health Post	Posto de Saúde	MoH	-6.26667	15.0667	Other
Angola	Uige	Quica Health Post	Posto de Saúde	MoH	-7.47455	15.0736	Other
Angola	Uige	Quicavuaba Health Post	Posto de Saúde	MoH	-7.39173	15.2309	Other
Angola	Uige	Quicoxi Bunga Health Post	Posto de Saúde	MoH	-7.28303	16.0331	Other
Angola	Uige	Quicoxi Mbuga Health Post	Posto de Saúde	MoH	-7.2934	16.0278	Other
Angola	Uige	Quicunga I Health Post	Posto de Saúde	MoH	-7.43546	15.3855	Other
Angola	Uige	Quicuti Health Post	Posto de Saúde	MoH	-7.28967	15.943	Combination
Angola	Uige	Quieca Health Post	Posto de Saúde	MoH	-7.08138	15.04	Other
Angola	Uige	Quifidi Health Post	Posto de Saúde	MoH	-7.30424	15.9953	Combination
Angola	Uige	Quifuani Health Post	Posto de Saúde	MoH	-7.2581	15.9146	Other
Angola	Uige	Quifutila Cambegue Health Post	Posto de Saúde	MoH	-7.32892	16.0603	Other
Angola	Uige	Quifutila Health Centre	Centro de Saúde	MoH	-7.51378	15.7024	Other
Angola	Uige	Quifutila Health Post	Posto de Saúde	MoH	-7.29338	16.0185	Other
Angola	Uige	Quilevo Health Post	Posto de Saúde	MoH	-7.61475	15.013	Other
Angola	Uige	Quilo Futa Health Post	Posto de Saúde	MoH	-6.417	15.733	Other
Angola	Uige	Quilogi Health Post	Posto de Saúde	MoH	-7.24427	14.5333	Other
Angola	Uige	Quilulendo Health Post	Posto de Saúde	MoH	-7.0411	15.8478	Other
Angola	Uige	Quilumbo Health Post	Posto de Saúde	MoH	-7.35	15.1	Other
Angola	Uige	Quimacungu Health Post	Posto de Saúde	MoH	-7.60017	15.0755	Other
Angola	Uige	Quimalalo Health Post	Posto de Saúde	MoH	-7.00005	14.9218	Combination
Angola	Uige	Quimanga Health Post	Posto de Saúde	MoH	-7.63333	15.1	Other
Angola	Uige	Quimangumbo Health Post	Posto de Saúde	MoH	-6.333	15.065	Encarta
Angola	Uige	Quimaria Health Centre	Centro de Saúde	MoH	-7.02702	14.3006	Other
Angola	Uige	Quimassabe Health Post	Posto de Saúde	MoH	-7.87725	15.0409	Other
Angola	Uige	Quimbale Health Post	Posto de Saúde	MoH	-7.1854	15.1182	Combination
Angola	Uige	Quimbata Health Post	Posto de Saúde	MoH	-5.8865	15.0042	Other
Angola	Uige	Quimbele Municipal Hospital	Municipal Hospital	Govt.	-6.517	16.217	Other
Angola	Uige	Quimbiangui Health Post	Posto de Saúde	MoH	-6.8464	15.8587	Other
Angola	Uige	Quimongo Health Post	Posto de Saúde	MoH	-7.18358	15.1713	Other
Angola	Uige	Quimulunga Health Post	Posto de Saúde	MoH	-7.55	15.35	Other
Angola	Uige	Quimussungo Health Post	Posto de Saúde	MoH	-7.33985	14.8508	Combination
Angola	Uige	Quimutange Health Post	Posto de Saúde	MoH	-7.30305	14.4355	Combination
Angola	Uige	Quinacuna Health Post	Posto de Saúde	MoH	-7.3	14.8667	Other
Angola	Uige	Quinanga 7 Health Post	Posto de Saúde	MoH	-6.58084	15.8829	Combination
Angola	Uige	Quindaca Health Post	Posto de Saúde	MoH	-7.48	15.0711	Other
Angola	Uige	Quindalulo Health Post	Posto de Saúde	MoH	-6.64103	16.2219	Other
Angola	Uige	Quindinga Health Centre	Centro de Saúde	MoH	-7.68333	15.4833	Other
Angola	Uige	Quingambo Health Post	Posto de Saúde	MoH	-7.43573	15.9671	Other
Angola	Uige	Quinguangua Health Post	Posto de Saúde	MoH	-7.60173	15.1356	Other
Angola	Uige	Quinguar Health Post	Posto de Saúde	MoH	-6.984	15.332	Encarta
Angola	Uige	Quingumba Health Post	Posto de Saúde	MoH	-6.58113	15.8845	Other
Angola	Uige	Quinvuenga Health Centre	Centro de Saúde	MoH	-7.09058	14.855	Other
Angola	Uige	Quinzambi Health Centre	Centro de Saúde	MoH	-7.66667	15.6167	Other
Angola	Uige	Quinzau Health Centre	Centro de Saúde	MoH	-6.22868	15.0744	Other
Angola	Uige	Quiombo Health Post	Posto de Saúde	MoH	-7.5	15.3333	Other
Angola	Uige	Quiomgua Health Post	Posto de Saúde	MoH	-7.65516	15.0627	Other
Angola	Uige	Quipaxi Health Post	Posto de Saúde	MoH	-7.23246	15.3428	Other
Angola	Uige	Quipedro Health Post	Posto de Saúde	MoH	-7.883	14.517	Other
Angola	Uige	Quipumba Health Post	Posto de Saúde	MoH	-7.25	15.0833	Other
Angola	Uige	Quipumba Health Post	Posto de Saúde	MoH	-6.95487	14.6329	Combination
Angola	Uige	Quiputo Health Post	Posto de Saúde	MoH	-7.5161	15.3232	Other
Angola	Uige	Quissanga Health Post	Posto de Saúde	MoH	-7.68714	15.0465	Other
Angola	Uige	Quisseque Health Centre	Centro de Saúde	MoH	-7.88333	15.2167	Other
Angola	Uige	Quisseque Lulovo Health Post	Posto de Saúde	MoH	-7.81867	15.6122	Other
Angola	Uige	Quissosso Health Post	Posto de Saúde	MoH	-7.3433	15.0989	Other
Angola	Uige	Quissosso Health Post	Posto de Saúde	MoH	-7.33652	15.1081	Other
Angola	Uige	Quitala Health Post	Posto de Saúde	MoH	-5.99099	15.1574	Other
Angola	Uige	Quitexe Centro Materno Infantil	Centro Materno Infantil	MoH	-7.93735	15.0446	Other
Angola	Uige	Quitoque Health Post	Posto de Saúde	MoH	-7.83333	15.0333	Other
Angola	Uige	Quitsala Health Post	Posto de Saúde	MoH	-7.26666	15.9331	Other
Angola	Uige	Quituia Health Post	Posto de Saúde	MoH	-7.83248	15.2414	Other
Angola	Uige	Quituia Health Post	Posto de Saúde	MoH	-6.61667	15.9167	Other
Angola	Uige	Quituma Health Post	Posto de Saúde	MoH	-7.52252	14.9367	Other
Angola	Uige	Quitungo Health Post	Posto de Saúde	MoH	-7.17263	15.6272	Other
Angola	Uige	Quiuqueque Health Post	Posto de Saúde	MoH	-7.29582	15.3447	Combination
Angola	Uige	Quivita Health Post	Posto de Saúde	MoH	-7.5203	14.9411	Other
Angola	Uige	Quizaucua	Posto de Saúde	MoH	-7.89446	15.6749	Other
Angola	Uige	Quizulo Health Post	Posto de Saúde	MoH	-7.13333	15.8833	Other
Angola	Uige	Sakandika Health Post	Posto de Saúde	MoH	-5.96667	15.9667	Other
Angola	Uige	Sanza Pombo Municipal Hospital	Municipal Hospital	Govt.	-7.3156	16.003	Other
Angola	Uige	Sede Milunga Health Centre	Centro de Saúde	MoH	-7.26292	15.0759	Combination
Angola	Uige	Sede S. Pombo Health Centre	Centro de Saúde	MoH	-7.3167	16	Google Earth
Angola	Uige	Senga Health Post	Posto de Saúde	MoH	-7.66667	15.2	Other
Angola	Uige	Soba Nanga Health Post	Posto de Saúde	MoH
Angola	Uige	Tange Health Post	Posto de Saúde	MoH	-7.63125	15.0714	Other
Angola	Uige	Tango Health Centre	Centro de Saúde	MoH	-8.13333	15.85	Other
Angola	Uige	Tema Health Post	Posto de Saúde	MoH	-7.65	15.45	Other
Angola	Uige	Tema Health Post	Posto de Saúde	MoH	-7.07813	14.7417	Other
Angola	Uige	Tema Health Post	Posto de Saúde	MoH	-6.89919	15.3189	Combination
Angola	Uige	Terra Nova Health Post	Posto de Saúde	MoH	-7.74969	15.2699	Combination
Angola	Uige	Toto Health Post	Posto de Saúde	MoH	-7.15	14.2667	Other
Angola	Uige	Uando Health Centre	Centro de Saúde	MoH	-7.04458	15.0013	Other
Angola	Uige	Uige Centro Materno Infantil	Centro Materno Infantil	MoH	-7.617	15.05	Other
Angola	Uige	Uige Centro Materno Infantil	Centro Materno Infantil	MoH	-7.61206	15.0572	Other
Angola	Uige	Uige Sanitorio Hospital	Hospital	Govt.	-7.61329	15.0533	Other
Angola	Uige	Vale de Loge Health Centre	Centro de Saúde	MoH	-6.82051	14.6068	Other
Angola	Uige	Valedia Health Post	Posto de Saúde	MoH	-6.06812	15.0984	Other
Angola	Uige	Velho Centro Materno Infantil	Centro Materno Infantil	MoH	-7.59838	15.0495	Combination
Angola	Uige	Vista Alegre Health Centre	Centro de Saúde	MoH	-7.93929	15.0398	Combination
Angola	Uige	Wamba Health Centre	Centro de Saúde	MoH	-7.31893	16.1699	Other
Angola	Uige	Wemita Health Post	Posto de Saúde	MoH	-8.01667	15.85	Other
Angola	Uige	Zambi Health Post	Posto de Saúde	MoH	-7.63333	15.2167	Other
Angola	Uige	Zanda Health Post	Posto de Saúde	MoH	-8	15.5333	Other
Angola	Uige	Zulo Zundo Health Post	Posto de Saúde	MoH	-7.55	15.5333	Other
Angola	Uige	Zunga Health Post	Posto de Saúde	MoH
Angola	Zaire	10 de Maio Health Centre	Centro de Saúde	MoH	-7.22609	12.8612	Combination
Angola	Zaire	11 de Nov. 26 Health Post	Posto de Saúde	MoH	-6.26755	14.2894	Other
Angola	Zaire	11 de Nov. Health Centre	Centro de Saúde	MoH	-5.89638	13.4641	Combination
Angola	Zaire	Augostinho Neto Health Centre	Centro de Saúde	MoH	-6.2204	12.3805	Google Earth
Angola	Zaire	Ave Maria Health Post	Posto de Saúde	MoH	-6.71667	14.1	Other
Angola	Zaire	Balu Health Post	Posto de Saúde	MoH	-5.87436	13.4318	Combination
Angola	Zaire	Bela Vista Health Post	Posto de Saúde	MoH	-6.23333	14.2333	Other
Angola	Zaire	Buela Health Centre	Centro de Saúde	MoH	-5.917	14.55	Other
Angola	Zaire	Bungo Health Post	Posto de Saúde	MoH	-6.41273	12.7861	Other
Angola	Zaire	Cacongo Health Post	Posto de Saúde	MoH	-6.75209	12.653	Other
Angola	Zaire	Camba Health Post	Posto de Saúde	MoH	-6.81392	14.15	Other
Angola	Zaire	Casa de Telha Health Post	Posto de Saúde	MoH	-6.80995	13.3289	Combination
Angola	Zaire	Chinde Health Post	Posto de Saúde	MoH	-6.35	12.7833	Other
Angola	Zaire	Dia- Dia Health Post	Posto de Saúde	MoH	-7.2283	12.8627	Other
Angola	Zaire	Dia- Dia Health Post	Posto de Saúde	MoH	-6.05	14.6833	Other
Angola	Zaire	Dobo Health Post	Posto de Saúde	MoH	-6.2681	14.2897	Combination
Angola	Zaire	General Ndozi Health Centre	Centro de Saúde	MoH	-6.20125	12.3719	Combination
Angola	Zaire	Igreja EvangTlica Baptista em Angola (IEBA) Health Centre	Centro de Saúde	MoH	-6.2629	14.2441	Combination
Angola	Zaire	Kaluka Health Centre	Centro de Saúde	MoH	-6.76667	14.1833	Other
Angola	Zaire	Kelo Health Centre	Centro de Saúde	MoH	-6.45	12.7333	Other
Angola	Zaire	Kenguele Health Post	Posto de Saúde	MoH	-6.88898	12.808	Other
Angola	Zaire	Kiaya Health Post	Posto de Saúde	MoH	-6.71529	13.6079	Other
Angola	Zaire	Kibala Health Centre	Centro de Saúde	MoH	-7.3859	13.7671	Other
Angola	Zaire	Kikongo Health Centre	Centro de Saúde	MoH	-6.08938	14.6342	Other
Angola	Zaire	Kikudo Health Centre	Centro de Saúde	MoH	-7.22666	12.858	Google Earth
Angola	Zaire	Kimakuku Health Post	Posto de Saúde	MoH	-7.1339	13.7911	Other
Angola	Zaire	Kimpondo Health Centre	Centro de Saúde	MoH
Angola	Zaire	Kindege Health Centre	Centro de Saúde	MoH	-7.1565	13.6369	Other
Angola	Zaire	Kinzau Health Centre	Centro de Saúde	MoH	-6.5506	12.5282	Combination
Angola	Zaire	Kiowa Health Post	Posto de Saúde	MoH	-6.25959	14.2489	Combination
Angola	Zaire	Kissanga Health Post	Posto de Saúde	MoH	-6.14324	12.5824	Other
Angola	Zaire	Kitona Health Post	Posto de Saúde	MoH	-6.2272	12.3822	Other
Angola	Zaire	Kuimba Centro Materno Infantil	Centro de Saúde	MoH	-6.1155	14.636	Other
Angola	Zaire	Kuimba Municipal Hospital	Municipal Hospital	Govt.	-6.12467	14.6248	Other
Angola	Zaire	Kungo Health Post	Posto de Saúde	MoH	-6.51726	12.4981	Other
Angola	Zaire	Loge Pequeno Health Post	Posto de Saúde	MoH	-7.23684	12.8687	Combination
Angola	Zaire	Lue Health Post	Posto de Saúde	MoH	-7.23764	12.8657	Other
Angola	Zaire	Lufico Health Centre	Centro de Saúde	MoH	-6.3714	13.5076	Other
Angola	Zaire	Lukata Health Post	Posto de Saúde	MoH	-6.6	12.5667	Other
Angola	Zaire	Lumbi Health Post	Posto de Saúde	MoH	-6.76324	13.5929	Other
Angola	Zaire	Lunguezi Health Post	Posto de Saúde	MoH	-5.98954	14.7665	Combination
Angola	Zaire	Lunuango Health Post	Posto de Saúde	MoH	-6.45	12.55	Other
Angola	Zaire	Luvaka Health Centre	Centro de Saúde	MoH	-5.98333	14.7667	Other
Angola	Zaire	Luvo Health Post	Posto de Saúde	MoH	-5.88	14.083	Other
Angola	Zaire	Madimba Health Centre	Centro de Saúde	MoH	-6.51554	14.353	Other
Angola	Zaire	Manoqui Health Centre	Centro de Saúde	MoH	-6.2859	14.2141	Combination
Angola	Zaire	Martins Kiditu Health Post	Posto de Saúde	MoH	-6.28369	14.2142	Other
Angola	Zaire	Mbamba Health Post	Posto de Saúde	MoH	-6.26211	14.2283	Combination
Angola	Zaire	Mbanza Kongo Municipal Hospital	Municipal Hospital	Govt.	-6.26552	14.253	Other
Angola	Zaire	Mbanza Mazina Health Post	Posto de Saúde	MoH	-6.26388	14.2915	Other
Angola	Zaire	Mbanza Ngungi Health Post	Posto de Saúde	MoH	-6.28978	13.6079	Other
Angola	Zaire	Mbumbuzi Health Post	Posto de Saúde	MoH	-6.1712	14.3839	Other
Angola	Zaire	Mongo Soyo Health Centre	Centro de Saúde	MoH	-6.67616	12.5916	Other
Angola	Zaire	Mpala Health Centre	Centro de Saúde	MoH	-6.1403	13.7399	Other
Angola	Zaire	Mpangala Health Post	Posto de Saúde	MoH	-6.04429	14.679	Combination
Angola	Zaire	Mpinda Health Centre	Centro de Saúde	MoH	-6.2	12.4	Other
Angola	Zaire	Mpuelo Health Post	Posto de Saúde	MoH	-5.91218	13.0198	Other
Angola	Zaire	Mukula Health Post	Posto de Saúde	MoH	-6.96667	12.8333	Other
Angola	Zaire	Musserra Health Centre	Centro de Saúde	MoH	-7.617	13.033	Other
Angola	Zaire	Nenkozi Health Centre	Centro de Saúde	MoH	-6.2717	14.2267	Combination
Angola	Zaire	Ngodia Health Post	Posto de Saúde	MoH	-6.1201	14.6211	Combination
Angola	Zaire	Ngoma Health Post	Posto de Saúde	MoH	-6.256	14.2204	Other
Angola	Zaire	Ngombeya Ngombe Health Post	Posto de Saúde	MoH	-6.13216	14.461	Other
Angola	Zaire	Nkalambata Health Centre	Centro de Saúde	MoH	-6.18815	14.3506	Other
Angola	Zaire	Nkembo Health Post	Posto de Saúde	MoH	-6.80836	13.3348	Other
Angola	Zaire	Nkiende Health Centre	Centro de Saúde	MoH	-6.44792	14.0066	Other
Angola	Zaire	Nkunga Paza Health Post	Posto de Saúde	MoH	-6.2856	14.21	Other
Angola	Zaire	Noqui Municipal Hospital	Municipal Hospital	Govt.	-5.87404	13.4327	Other
Angola	Zaire	Nsanda Health Post	Posto de Saúde	MoH	-7.12622	13.7119	Other
Angola	Zaire	Ntavudi Health Post	Posto de Saúde	MoH	-6.0915	14.6379	Combination
Angola	Zaire	Ntuco Health Centre	Centro de Saúde	MoH	-6.3191	14.1478	Other
Angola	Zaire	Nvuma Health Post	Posto de Saúde	MoH	-6.59663	13.5011	Other
Angola	Zaire	Nzeto Municipal Hospital	Municipal Hospital	Govt.	-7.23162	12.8701	Other
Angola	Zaire	Pangala Health Post	Posto de Saúde	MoH	-6.21667	12.3833	Other
Angola	Zaire	Pedra de Feitito Health Centre	Centro de Saúde	MoH	-5.917	12.967	Other
Angola	Zaire	Quatro de Fevereiro Health Post	Posto de Saúde	MoH	-6.8206	13.3153	Combination
Angola	Zaire	Quiela Health Post	Posto de Saúde	MoH	-5.99209	12.9302	Other
Angola	Zaire	Quincuvi Health Post	Posto de Saúde	MoH	-5.97828	14.7206	Other
Angola	Zaire	Quingombo Health Post	Posto de Saúde	MoH	-6.77709	12.6799	Other
Angola	Zaire	Quinximba Health Centre	Centro de Saúde	MoH	-6.13369	12.3766	Other
Angola	Zaire	Quioua Health Post	Posto de Saúde	MoH	-6.74517	13.3556	Other
Angola	Zaire	Quivemba Nzinga Health Post	Posto de Saúde	MoH	-6.14511	12.6972	Other
Angola	Zaire	Sangui Health Post	Posto de Saúde	MoH	-6.451	14.016	Encarta
Angola	Zaire	Sinfo Health Post	Posto de Saúde	MoH	-6.26806	14.2493	Combination
Angola	Zaire	Soyo Municipal Hospital	Municipal Hospital	Govt.	-6.13152	12.3701	Other
Angola	Zaire	Sumba Health Centre	Centro de Saúde	MoH	-6.14852	12.6201	Other
Angola	Zaire	Sumpi Health Post	Posto de Saúde	MoH	-6.04429	14.1562	Other
Angola	Zaire	Tombe Health Post	Posto de Saúde	MoH	-6.41667	12.4667	Other
Angola	Zaire	Tomboco Municipal Hospital	Municipal Hospital	Govt.	-6.79857	13.3031	Other
Angola	Zaire	Vonde-Tari Health Post	Posto de Saúde	MoH	-6.2194	12.6431	Other
Angola	Zaire	Wolongo Health Post	Posto de Saúde	MoH	-6.27139	14.2393	Other
Angola	Zaire	Yenga Health Post	Posto de Saúde	MoH	-6.65474	13.825	Other
Angola	Zaire	Zaire Provincial Hospital	Provincial Hospital	Govt.	-6.26239	14.2467	Combination
Benin	Alibori	Alfakoara Centre de santé	Health Centre	Public	11.1143	2.9299	Combination
Benin	Alibori	Angaradebou Centre Communal de Santé	Community Health Centre	Public	11.3238	3.0433	GPS
Benin	Alibori	Baani-Zoumbu Centre de santé	Health Centre	Public	11.132	2.9204	Combination
Benin	Alibori	Badou Centre de santé	Health Centre	Public	10.896	2.734	Geonames
Benin	Alibori	Bagou Centre Communal de Santé	Community Health Centre	Public	10.816	2.728	GPS
Benin	Alibori	Banikoara Centre de Santé	Health Centre	Public	11.339	2.459	Geonames
Benin	Alibori	Banikoara Hôpital de Zone	Hôpital de Zone	Public	11.299	2.4338	GPS
Benin	Alibori	Banite Centre de santé	Health Centre	Public	11.8547	3.3888	Combination
Benin	Alibori	Bensekou Centre de Santé d’Arrondissement	Centre de Santé d’Arrondissement	Public	10.985	3.153	Geonames
Benin	Alibori	Birni Lafia Centre de Santé d’Arrondissement	Centre de Santé d’Arrondissement	Public	11.979	3.221	Geonames
Benin	Alibori	Bobena Centre de Santé d’Arrondissement	Centre de Santé d’Arrondissement	Public	10.794	3.534	Geonames
Benin	Alibori	Bodjecali Centre de Santé d’Arrondissement	Centre de Santé d’Arrondissement	Public	11.809	3.383	Encarta
Benin	Alibori	Bogo-Bogo Centre de Santé d’Arrondissement	Centre de Santé d’Arrondissement	Public	12.106	3.105	Geonames
Benin	Alibori	Borodarou Centre de Santé d’Arrondissement	Centre de Santé d’Arrondissement	Public	10.983	2.874	Geonames
Benin	Alibori	Donwari Centre Communal de Santé	Community Health Centre	Public	11.1166	2.8566	GPS
Benin	Alibori	Fouet Dispensaire	Dispensaire	Public	11.234	3.049	Encarta
Benin	Alibori	Founougo Centre Communal de Santé	Community Health Centre	Public	11.4734	2.5342	GPS
Benin	Alibori	Gansosso Centre Communal de Santé	Community Health Centre	Public	11.0744	2.9014	GPS
Benin	Alibori	Garou Centre de Santé d’Arrondissement	Centre de Santé d’Arrondissement	Public	11.799	3.483	Encarta
Benin	Alibori	Garou Tedji Centre de santé	Health Centre	Public	11.7568	3.522	Encarta
Benin	Alibori	Gbassa Dispensaire	Dispensaire	Public	11.0678	2.2219	GPS
Benin	Alibori	Gbeniki Dispensaire	Dispensaire	Public	11.2899	2.4271	Combination
Benin	Alibori	Gogounou Centre de Santé de Sous-Prefecture	Centre de Santé de Sous-Prefecture	Public	10.8366	2.8378	GPS
Benin	Alibori	Gomparou Centre Communal de Santé	Community Health Centre	Public	11.3268	2.4709	GPS
Benin	Alibori	Goumori Centre Communal de Santé	Community Health Centre	Public	11.1716	2.2938	GPS
Benin	Alibori	Gounarou Centre Communal de Santé	Community Health Centre	Public	10.8772	2.8495	GPS
Benin	Alibori	Goun-Goun Centre de santé	Health Centre	Public	11.8663	3.38896	Combination
Benin	Alibori	Guene Centre de Santé d’Arrondissement	Centre de Santé d’Arrondissement	Public	11.7318	3.2242	GPS
Benin	Alibori	Igrigou Centre de santé	Health Centre	Public	11.3012	2.4356	Combination
Benin	Alibori	Kandi Hôpital de Zone	Hôpital de Zone	Public	11.1364	2.9428	GPS
Benin	Alibori	Kandi II Centre de Santé d’Arrondissement	Centre de Santé d’Arrondissement	Public	11.1331	2.9353	Encarta
Benin	Alibori	Karimama Centre de Santé	Health Centre	Public	12.0667	3.1794	GPS
Benin	Alibori	Kassa Centre de santé	Health Centre	Public	11.585	3.508	Geonames
Benin	Alibori	Kassakou Centre Communal de Santé	Community Health Centre	Public	11.0744	2.9018	GPS
Benin	Alibori	Kokey Centre de Santé d’Arrondissement	Centre de Santé d’Arrondissement	Public	11.183	2.283	Geonames
Benin	Alibori	Kokiborou Centre de santé	Health Centre	Public	11.202	2.319	Geonames
Benin	Alibori	Kompa Centre de Santé d’Arrondissement	Centre de Santé d’Arrondissement	Public	12.206	3.034	Geonames
Benin	Alibori	Koute Centre de santé	Health Centre	Public	10.688	3.799	Geonames
Benin	Alibori	Libante Centre de Santé d’Arrondissement	Centre de Santé d’Arrondissement	Public	10.7859	3.5845	GPS
Benin	Alibori	Liboussou Centre de Santé d’Arrondissement	Centre de Santé d’Arrondissement	Public	10.92	3.486	Geonames
Benin	Alibori	Lougou Centre de santé	Health Centre	Public	10.647	2.543	Geonames
Benin	Alibori	Lougou Dispensaire	Dispensaire	Public	10.6485	2.541	Geonames
Benin	Alibori	Madekali Centre de Santé d’Arrondissement	Centre de Santé d’Arrondissement	Public	11.7062	3.5472	GPS
Benin	Alibori	Malan-Karimama Hôpital de Zone	Hôpital de Zone	Public	12.067	3.183	Other
Benin	Alibori	Malanville Hôpital de Zone	Hôpital de Zone	Public	11.864	3.3895	GPS
Benin	Alibori	Monkassa Centre de santé	Health Centre	Public	11.786	3.397	Geonames
Benin	Alibori	Monsey Centre de Santé d’Arrondissement	Centre de Santé d’Arrondissement	Public	12.292	2.924	Geonames
Benin	Alibori	Morou Centre de santé	Health Centre	Public	10.641	3.317	Encarta
Benin	Alibori	Ouara Centre de Santé d’Arrondissement	Centre de Santé d’Arrondissement	Public	10.876	3.4	Geonames
Benin	Alibori	Ouere Centre de santé	Health Centre	Public	10.788	2.805	Geonames
Benin	Alibori	Ounet Centre Communal de Santé	Community Health Centre	Public	11.2313	2.4059	GPS
Benin	Alibori	Piami Centre de santé	Health Centre	Public	10.955	3.638	Geonames
Benin	Alibori	Regina Pacis Centre Medical	Centre Médical	FBO	11.1342	2.9386	Combination
Benin	Alibori	Saah Centre de Santé d’Arrondissement	Centre de Santé d’Arrondissement	Public	11.1767	3.0703	Geonames
Benin	Alibori	Sakawan-Tedji Centre de santé	Health Centre	Public	11.868	3.382	Combination
Benin	Alibori	Sam Centre Communal de Santé	Community Health Centre	Public	11.027	2.7359	GPS
Benin	Alibori	Saonzi Centre de Santé d’Arrondissement	Centre de Santé d’Arrondissement	Public	10.716	3.59	Geonames
Benin	Alibori	Segbana Centre de Santé	Health Centre	Public	10.9193	3.6912	GPS
Benin	Alibori	Serebane Centre de santé	Health Centre	Public	10.794	3.465	Encarta
Benin	Alibori	Sokotindji Centre de Santé d’Arrondissement	Centre de Santé d’Arrondissement	Public	10.85	3.429	Geonames
Benin	Alibori	Somperekou Centre de santé	Health Centre	Public	11.233	2.417	Geonames
Benin	Alibori	Sonsoro Centre Communal de Santé	Community Health Centre	Public	11.0848	2.7623	GPS
Benin	Alibori	Sori Centre Communal de Santé	Community Health Centre	Public	10.7146	2.78	GPS
Benin	Alibori	Soumabougou Centre de santé	Health Centre	FBO	11.2884	2.4225	Combination
Benin	Alibori	Tankongou Centre de santé	Health Centre	Public	10.934	2.732	Encarta
Benin	Alibori	Thya Dispensaire	Dispensaire	Public	11.3506	3.0604	GPS
Benin	Alibori	Tissarou UVS Unites de Santé de Village	Unites de Santé de Village	FBO	11.117	2.884	Encarta
Benin	Alibori	Tomboutou Centre de Santé d’Arrondissement	Centre de Santé d’Arrondissement	Public	11.8539	3.2933	GPS
Benin	Alibori	Toura Centre Communal de Santé	Community Health Centre	Public	11.2379	2.3767	GPS
Benin	Alibori	Urbain Centre de Santé d’Arrondissement	Centre de Santé d’Arrondissement	Public	11.8494	3.38381	GPS
Benin	Alibori	Wara Centre Communal de Santé	Community Health Centre	Public	10.6799	2.67656	GPS
Benin	Alibori	Yampagou Centre de santé	Health Centre	Public	11.3006	2.4456	Combination
Benin	Alibori	Zougou Pantrossi Centre Communal de Santé	Community Health Centre	Public	10.7334	2.9821	GPS
Benin	Atacora	Atacora Centre Hospitalier Départemental	Centre Hospitalier Départemental	Public	10.2783	1.3781	GPS
Benin	Atacora	Birni Centre de Santé d’Arrondissement	Centre de Santé d’Arrondissement	Public	9.9937	1.5231	GPS
Benin	Atacora	Boukoumbe Centre Communal de Santé	Community Health Centre	Public	10.1738	1.1117	GPS
Benin	Atacora	Bouyanyindi Centre de santé	Health Centre	FBO	10.488	1.5102	Combination
Benin	Atacora	Cases Dipoli Centre Medical	Centre Médical	Public	10.3	1.1	Geonames
Benin	Atacora	Cobli Centre Communal de Santé	Community Health Centre	Public	10.4835	1.0134	GPS
Benin	Atacora	Cotiakou Centre de santé	Health Centre	Public	10.583	1.3	Encarta
Benin	Atacora	Dassari Centre de Santé d’Arrondissement	Centre de Santé d’Arrondissement	Public	10.8121	1.142	GPS
Benin	Atacora	Datori Centre de Santé d’Arrondissement	Centre de Santé d’Arrondissement	Public	10.4145	0.7907	GPS
Benin	Atacora	Fetekou Centre de Santé	Health Centre	Public	10.7952	2.1842	GPS
Benin	Atacora	Firou Centre de Santé d’Arrondissement	Centre de Santé d’Arrondissement	Public	10.9171	1.94558	GPS
Benin	Atacora	Fo-Tance Centre de santé	Health Centre	Public	10.4167	1.6833	Geonames
Benin	Atacora	Gnemasson Centre de santé	Health Centre	Public	10.3078	2.037	Geonames
Benin	Atacora	Gouande Centre de Santé d’Arrondissement	Centre de Santé d’Arrondissement	Public	10.777	0.9219	GPS
Benin	Atacora	Guilmaro Centre de Santé d’Arrondissement	Centre de Santé d’Arrondissement	Public	10.5659	1.7281	GPS
Benin	Atacora	Kaobagou Centre de santé	Health Centre	Public	10.197	1.641	Encarta
Benin	Atacora	Kerou Centre de Santé	Health Centre	Public	10.8249	2.1086	GPS
Benin	Atacora	Koronkore Centre de santé	Health Centre	Public	10.583	1.33	Encarta
Benin	Atacora	Korontiere Centre Communal de Santé	Community Health Centre	Public	10.2679	0.9595	GPS
Benin	Atacora	Kotopounga Centre Communal de Santé	Community Health Centre	Public	10.3069	1.534	GPS
Benin	Atacora	Kouaba Centre de Santé d’Arrondissement	Centre de Santé d’Arrondissement	Public	10.253	1.226	Geonames
Benin	Atacora	Kouandata Centre de Santé d’Arrondissement	Centre de Santé d’Arrondissement	Public	10.1134	1.3445	Geonames
Benin	Atacora	Kouande Hôpital de Zone	Hôpital de Zone	Public	10.336	1.6907	GPS
Benin	Atacora	Kouarfa Centre de Santé d’Arrondissement	Centre de Santé d’Arrondissement	Public	10.488	1.51	Geonames
Benin	Atacora	Kountori Centre de Santé d’Arrondissement	Centre de Santé d’Arrondissement	Public	10.4066	0.9441	GPS
Benin	Atacora	Koussoucoingou Centre de Santé d’Arrondissement	Centre de Santé d’Arrondissement	Public	10.168	1.365	Encarta
Benin	Atacora	Mamoussa Centre de santé	Health Centre	Public	10.6212	1.2665	Combination
Benin	Atacora	Manta Centre Communal de Santé	Community Health Centre	Public	10.3526	1.1089	GPS
Benin	Atacora	Materi Centre Communal de Santé	Community Health Centre	Public	10.6949	1.0649	GPS
Benin	Atacora	Natitingou Hôpital de Zone	Hôpital de Zone	Public	10.3105	1.3778	GPS
Benin	Atacora	NatitingouU Centro de Santé de Circonscription Urbaine	Centro de Santé de Circonscription Urbaine	Public	10.3116	1.3781	GPS
Benin	Atacora	Natta Konacogou Centre de santé	Health Centre	FBO	10.2228	1.1168	Combination
Benin	Atacora	N'Dahonta Centre Communal de Santé	Community Health Centre	Public	10.5282	1.1155	GPS
Benin	Atacora	Nodi Centre de Santé d’Arrondissement	Centre de Santé d’Arrondissement	Public	10.617	1.017	Encarta
Benin	Atacora	Ouassa-Tobre Centre de Santé d’Arrondissement	Centre de Santé d’Arrondissement	Public	10.198	2.1298	GPS
Benin	Atacora	Ouinra Centre de santé	Health Centre	Public	10.625	2.062	Other
Benin	Atacora	Ouore Dispensaire	Dispensaire	Public	10.9171	1.94556	GPS
Benin	Atacora	Ourou Kayo Centre de santé	Health Centre	Public	10.3	1.7333	Geonames
Benin	Atacora	Pehunco Centre Communal de Santé	Community Health Centre	Public	10.2288	1.9996	GPS
Benin	Atacora	Perma Centre Communal de Santé	Community Health Centre	Public	10.116	1.4399	GPS
Benin	Atacora	Perporiyakou Centre de santé	Health Centre	Public	10.3167	1.3833	Combination
Benin	Atacora	Pikire Centre de Santé d’Arrondissement	Centre de Santé d’Arrondissement	Public	10.7406	2.1262	GPS
Benin	Atacora	Porga Centre de santé	Health Centre	FBO	11.046	0.967	Combination
Benin	Atacora	St Jean de Dieu Hôpital	Hôpital	FBO	10.6246	1.2673	GPS
Benin	Atacora	Tabota Centre de Santé d’Arrondissement	Centre de Santé d’Arrondissement	Public	10.3	1.2	Geonames
Benin	Atacora	Tampegre Centre de Santé d’Arrondissement	Centre de Santé d’Arrondissement	Public	10.417	1.332	Encarta
Benin	Atacora	Tangieta Centre Communal de Santé	Community Health Centre	Public	10.623	1.2713	GPS
Benin	Atacora	Tanogou Centre de Santé d’Arrondissement	Centre de Santé d’Arrondissement	Public	10.817	1.433	Encarta
Benin	Atacora	Tantega Centre de Santé d’Arrondissement	Centre de Santé d’Arrondissement	Public	10.8292	1.0229	GPS
Benin	Atacora	Tapoga Centre de Santé d’Arrondissement	Centre de Santé d’Arrondissement	Public	10.5674	0.9917	GPS
Benin	Atacora	Tayakou Centre de santé	Health Centre	Public	10.55	1.2	Encarta
Benin	Atacora	Tchanhoun-Cossi Centre de Santé d’Arrondissement	Centre de Santé d’Arrondissement	Public	10.684	1.049	Combination
Benin	Atacora	Tchatingou Centre de santé	Health Centre	Public	10.818	1.465	Encarta
Benin	Atacora	Tchoumi-Tchoumi Centre de Santé d’Arrondissement	Centre de Santé d’Arrondissement	Public	10.085	1.3801	Geonames
Benin	Atacora	Toucountouna Centre Communal de Santé	Community Health Centre	Public	10.503	1.374	Geonames
Benin	Atacora	Yarikou Centre de santé	Health Centre	Public	10.391	1.573	Geonames
Benin	Atlantique	Abomey-Calavi Hôpital de Zone	Hôpital de Zone	Public	6.4727	2.3429	GPS
Benin	Atlantique	Adjan Centre de santé	Health Centre	Public	6.7	2.298	Encarta
Benin	Atlantique	Adjime-Aota Centre de santé	Health Centre	Public	6.6686	2.1733	Combination
Benin	Atlantique	Aganmalome Centre de Santé d’Arrondissement	Centre de Santé d’Arrondissement	Public	6.462	2.0228	Geonames
Benin	Atlantique	Agbanou Centre de Santé d’Arrondissement	Centre de Santé d’Arrondissement	Public	6.6691	2.1681	Combination
Benin	Atlantique	Agon Centre de santé	Health Centre	Public	6.85	2.229	Geonames
Benin	Atlantique	Agonkanme Centre de Santé d’Arrondissement	Centre de Santé d’Arrondissement	Public	6.517	2.04234	Combination
Benin	Atlantique	Ahomey Lokpo Centre de santé	Health Centre	Public	6.494	2.4019	Combination
Benin	Atlantique	Ahouannonzoun Centre de santé	Health Centre	Public	6.6622	2.1197	Geonames
Benin	Atlantique	Akadjame Centre de santé	Health Centre	Public	6.45	2.182	Encarta
Benin	Atlantique	Allada Centre Communal de Santé	Community Health Centre	Public	6.6703	2.1688	Combination
Benin	Atlantique	Attogon Centre de Santé d’Arrondissement	Centre de Santé d’Arrondissement	Public	6.7229	2.1639	Geonames
Benin	Atlantique	Avakpa Centre de Santé d’Arrondissement	Centre de Santé d’Arrondissement	Public	6.6624	2.0425	Geonames
Benin	Atlantique	Avame Centre de Santé d’Arrondissement	Centre de Santé d’Arrondissement	Public	6.5086	2.1443	GPS
Benin	Atlantique	Avlekete Centre de Santé d’Arrondissement	Centre de Santé d’Arrondissement	Public	6.3456	2.2034	Geonames
Benin	Atlantique	Ayou Centre de santé	Health Centre	Public	6.7264	2.118	Geonames
Benin	Atlantique	Azohoue-Aliho Centre de Santé d’Arrondissement	Centre de Santé d’Arrondissement	Public	6.567	2.133	Encarta
Benin	Atlantique	Azohoue-Cada Centre de Santé d’Arrondissement	Centre de Santé d’Arrondissement	Public	6.567	2.084	Encarta
Benin	Atlantique	Bethesda/Hevie Clinique	Clinic	FBO	6.4056	2.2535	Geonames
Benin	Atlantique	Case Degoue Centre de santé	Health Centre	Public	6.3766	2.0866	Combination
Benin	Atlantique	Case Houenouko Centre de santé	Health Centre	Public	6.5086	2.1443	GPS
Benin	Atlantique	Cesak-Agbanto Centre de santé	Health Centre	Public	6.4477	2.0115	Combination
Benin	Atlantique	Cococodji Centre de Santé d’Arrondissement	Centre de Santé d’Arrondissement	Public	6.389	2.285	Geonames
Benin	Atlantique	Coussi Centre de santé	Health Centre	Public	6.8526	2.142	Geonames
Benin	Atlantique	Ctal Ouidah Centre de santé	Health Centre	Public	6.38758	2.06589	Combination
Benin	Atlantique	Dame Centre de santé	Health Centre	Public	6.717	2.234	Encarta
Benin	Atlantique	Dedome Centre de santé	Health Centre	Public	6.4694	2.0328	Combination
Benin	Atlantique	Dekanme Centre de Santé d’Arrondissement	Centre de Santé d’Arrondissement	Public	6.4911	2.421	Combination
Benin	Atlantique	Dekoungbe Centre de santé	Health Centre	Public	6.3833	2.35	Fallingrain
Benin	Atlantique	Djanglanme Centre de santé	Health Centre	Public	6.8319	2.10579	Combination
Benin	Atlantique	Djegbadji Centre de Santé d’Arrondissement	Centre de Santé d’Arrondissement	Public	6.3817	2.0759	Combination
Benin	Atlantique	Djigbe Centre de santé	Health Centre	Public	6.8334	2.383	Google Earth
Benin	Atlantique	Djondji Dispensaire	Dispensaire	Public	6.303	1.974	GPS
Benin	Atlantique	Dodji-Bata Centre de santé	Health Centre	Public	6.68	2.283	Geonames
Benin	Atlantique	Gakpe Centre de Santé d’Arrondissement	Centre de Santé d’Arrondissement	Public	6.4226	2.1359	Geonames
Benin	Atlantique	Ganlonon-Codji Centre de santé	Health Centre	Public	6.3599	2.0941	Combination
Benin	Atlantique	Ganvie Centre de Santé d’Arrondissement	Centre de Santé d’Arrondissement	Public	6.4644	2.3929	Geonames
Benin	Atlantique	Glo-Djigbe Centre de Santé d’Arrondissement	Centre de Santé d’Arrondissement	Public	6.55	2.332	Encarta
Benin	Atlantique	Godomey Centre de Santé d’Arrondissement	Centre de Santé d’Arrondissement	Public	6.546	2.369	Geonames
Benin	Atlantique	Hekandji Centre de santé	Health Centre	Public	6.5151	2.0895	GPS
Benin	Atlantique	Hevie Centre de Santé d’Arrondissement	Centre de Santé d’Arrondissement	Public	6.4122	2.2638	Geonames
Benin	Atlantique	Hinvi Centre de Santé d’Arrondissement	Centre de Santé d’Arrondissement	Public	6.7667	2.167	Geonames
Benin	Atlantique	Houakpe Centre de Santé d’Arrondissement	Centre de Santé d’Arrondissement	Public	6.3642	2.0812	Combination
Benin	Atlantique	Houedo-Aguekon Centre de santé	Health Centre	Public	6.4963	2.4268	Other
Benin	Atlantique	Houegbo Centre de Santé d’Arrondissement	Centre de Santé d’Arrondissement	Public	6.8503	2.1391	Combination
Benin	Atlantique	Kansoukpa Centre de Santé d’Arrondissement	Centre de Santé d’Arrondissement	Public	6.4438	2.3282	Combination
Benin	Atlantique	Kinto Oudjra Centre de santé	Health Centre	Public	6.6309	2.4119	Combination
Benin	Atlantique	Koudokpoe Centre de santé	Health Centre	Public	6.768	2.267	Encarta
Benin	Atlantique	Kougbedji Dispensaire	Dispensaire	Public	6.4861	2.0409	GPS
Benin	Atlantique	Kpago-Houedo Centre de santé	Health Centre	Public	6.4675	2.0063	Combination
Benin	Atlantique	Kpanroun Centre de santé	Health Centre	Public	6.5092	2.3278	Geonames
Benin	Atlantique	Kpasse Centre de santé	Health Centre	Public	6.3604	2.1019	Combination
Benin	Atlantique	Kpomasse Centre de Santé d’Arrondissement	Centre de Santé d’Arrondissement	Public	6.51	2.047	Google Earth
Benin	Atlantique	Kpome Centre de santé	Health Centre	Public	6.943	2.307	Geonames
Benin	Atlantique	La Croix de Zinvie Hôpital	Hôpital	FBO	6.5987	2.364	GPS
Benin	Atlantique	Lissegazoun Centre de Santé d’Arrondissement	Centre de Santé d’Arrondissement	Public	6.6167	2.083	Geonames
Benin	Atlantique	Lon-Agonmey Centre de santé	Health Centre	Public	6.733	2.05	Geonames
Benin	Atlantique	Ouedo Centre de Santé d’Arrondissement	Centre de Santé d’Arrondissement	Public	6.4033	2.2568	GPS
Benin	Atlantique	Ouida Hôpital	Hôpital	Public	6.3575	2.0857	GPS
Benin	Atlantique	Ouidah Hôpital de Zone	Hôpital de Zone	Public	6.3832	2.0661	GPS
Benin	Atlantique	Pahou Centre de Santé d’Arrondissement	Centre de Santé d’Arrondissement	Public	6.3877	2.2142	Geonames
Benin	Atlantique	Savi Centre de Santé d’Arrondissement	Centre de Santé d’Arrondissement	Public	6.4167	2.1	Geonames
Benin	Atlantique	Sedje-Denou Centre de Santé d’Arrondissement	Centre de Santé d’Arrondissement	Public	6.699	2.384	Encarta
Benin	Atlantique	Segbeya Centre de Santé d’Arrondissement	Centre de Santé d’Arrondissement	Public	6.5047	2.0523	GPS
Benin	Atlantique	Segbohoue Centre de Santé d’Arrondissement	Centre de Santé d’Arrondissement	Public	6.41	1.96	Geonames
Benin	Atlantique	Sehoue Centre de Santé d’Arrondissement	Centre de Santé d’Arrondissement	Public	6.8326	2.1104	Combination
Benin	Atlantique	Sekou Centre de Santé d’Arrondissement	Centre de Santé d’Arrondissement	Public	6.6401	2.22	Geonames
Benin	Atlantique	Sey Centre de santé	Health Centre	Public	6.749	2.1	Encarta
Benin	Atlantique	So-Ava Centre Communal de Santé	Community Health Centre	Public	6.4925	2.4019	Geonames
Benin	Atlantique	Sogbadji Centre de santé	Health Centre	Public	6.3694	2.0691	Combination
Benin	Atlantique	Soyo Centre de Santé d’Arrondissement	Centre de Santé d’Arrondissement	Public	6.6643	2.1695	Combination
Benin	Atlantique	St Jeanmaria Gleta Centre Medical	Centre Médical	FBO	6.46	2.3371	Combination
Benin	Atlantique	St Raphael de Hekanme Centre Medical	Centre Médical	FBO	6.9068	2.4453	Geonames
Benin	Atlantique	Tangbo Djevie Centre de santé	Health Centre	Public	6.599	2.299	Encarta
Benin	Atlantique	Toffo Centre de Santé d’Arrondissement	Centre de Santé d’Arrondissement	Public	6.85	2.0833	Geonames
Benin	Atlantique	Togba Centre de santé	Health Centre	Public	6.456	2.2634	Geonames
Benin	Atlantique	Togoudo Centre de santé	Health Centre	Public	6.6655	2.17	Geonames
Benin	Atlantique	Tokpa Centre de Santé d’Arrondissement	Centre de Santé d’Arrondissement	Public	6.7	2.066	Geonames
Benin	Atlantique	Tokpa-Domey Centre de santé	Health Centre	Public	6.49971	2.03288	Combination
Benin	Atlantique	Tori Gare Centre de Santé d’Arrondissement	Centre de Santé d’Arrondissement	Public	6.5074	2.1738	GPS
Benin	Atlantique	Tori-Bossito Centre de Santé d’Arrondissement	Centre de Santé d’Arrondissement	Public	6.503	2.1441	Geonames
Benin	Atlantique	Vekky Centre de santé	Health Centre	Public	6.494	2.3994	Combination
Benin	Atlantique	Womey Centre de santé	Health Centre	Public	6.4317	2.3468	Combination
Benin	Atlantique	Ze Centre Communal de Santé	Community Health Centre	Public	6.784	2.3	Encarta
Benin	Atlantique	Zinvie Centre de santé	Health Centre	Public	6.617	2.351	Encarta
Benin	Borgou	Abpf Dispensaire	Dispensaire	Public	9.3372	2.6303	Combination
Benin	Borgou	Agbassa Centre de santé	Health Centre	Public	8.7986	2.2368	Geonames
Benin	Borgou	Alafiarou Centre de Santé d’Arrondissement	Centre de Santé d’Arrondissement	Public	8.88064	2.60828	Combination
Benin	Borgou	Babarou Centre Medical	Centre Médical	FBO	9.108	2.4195	Geonames
Benin	Borgou	Banikanni Centre de santé	Health Centre	Public	9.3636	2.6009	Combination
Benin	Borgou	Basso Centre de Santé d’Arrondissement	Centre de Santé d’Arrondissement	Public	10.5004	3.6864	Geonames
Benin	Borgou	Bembereke Centre de Santé de Sous-Prefecture	Centre de Santé de Sous-Prefecture	Public	10.2219	2.6636	GPS
Benin	Borgou	Beroubouay Centre de Santé d’Arrondissement	Centre de Santé d’Arrondissement	Public	10.535	2.73	Encarta
Benin	Borgou	Bessassi Centre de Santé d’Arrondissement	Centre de Santé d’Arrondissement	Public	10.384	3.4693	Geonames
Benin	Borgou	Beterou Centre Communal de Santé	Community Health Centre	Public	9.2017	2.2758	GPS
Benin	Borgou	Biro Centre Communal de Santé	Community Health Centre	Public	9.9037	2.94	GPS
Benin	Borgou	Boco Hôpital	Hôpital	FBO	9.4674	2.631	GPS
Benin	Borgou	Bonwoberou Centre de santé	Health Centre	FBO	8.8855	2.5922	GPS
Benin	Borgou	Borgou Centre Hospitalier Départemental	Centre Hospitalier Départemental	Public	9.3365	2.6363	GPS
Benin	Borgou	Bori Centre de Santé d’Arrondissement	Centre de Santé d’Arrondissement	Public	9.7504	2.4327	Geonames
Benin	Borgou	Boro Centre de santé	Health Centre	Public	9.5054	3.0657	Geonames
Benin	Borgou	Bouanri Centre Communal de Santé	Community Health Centre	Public	10.1956	2.8717	GPS
Benin	Borgou	Bouka Centre Communal de Santé	Community Health Centre	Public	10.2112	3.1423	GPS
Benin	Borgou	Derassi Centre Communal de Santé	Community Health Centre	Public	10.1589	3.2604	GPS
Benin	Borgou	Diguidirou Centre de Santé d’Arrondissement	Centre de Santé d’Arrondissement	Public	9.6091	3.1364	Geonames
Benin	Borgou	Djega Centre de santé	Health Centre	Public	10.3033	3.2159	Geonames
Benin	Borgou	Dunkassa Centre Communal de Santé	Community Health Centre	Public	10.3572	3.1493	GPS
Benin	Borgou	Fo-Boure Centre Communal de Santé	Community Health Centre	Public	10.1137	2.3992	GPS
Benin	Borgou	Fombawi Centre de santé	Health Centre	Public	9.95	3.366	Encarta
Benin	Borgou	Gamia Centre Communal de Santé	Community Health Centre	Public	10.4043	2.7295	GPS
Benin	Borgou	Ganro Centre de Santé d’Arrondissement	Centre de Santé d’Arrondissement	Public	10.316	2.884	Encarta
Benin	Borgou	Gbari Centre de santé	Health Centre	Public	9.94695	3.20541	Combination
Benin	Borgou	Gbegourou Centre de Santé d’Arrondissement	Centre de Santé d’Arrondissement	Public	9.4425	2.7407	GPS
Benin	Borgou	Gninsy Centre de santé	Health Centre	Public	9.7988	2.9874	Combination
Benin	Borgou	Gnonkourokali Centre de santé	Health Centre	Public	9.9267	3.2109	Combination
Benin	Borgou	Gommey Centre de Santé d’Arrondissement	Centre de Santé d’Arrondissement	Public	9.6	2.883	Encarta
Benin	Borgou	Goro Centre de santé	Health Centre	Public	8.9739	2.4979	Geonames
Benin	Borgou	Gounkpare Centre de Santé d’Arrondissement	Centre de Santé d’Arrondissement	Public	9.468	2.933	Encarta
Benin	Borgou	Guerankali Centre de santé	Health Centre	Public	10.2308	2.6761	Combination
Benin	Borgou	Guere Bembe Hôpital	Hôpital	Public	10.2377	2.7325	GPS
Benin	Borgou	Guessou Sud Dispensaire	Dispensaire	Public	10.0384	2.6479	GPS
Benin	Borgou	Guessou-Bani Centre de santé	Health Centre	Public	10.333	2.266	Encarta
Benin	Borgou	Guinagourou Centre Communal de Santé	Community Health Centre	Public	9.56387	2.9489	GPS
Benin	Borgou	Heb Hôpital	Hôpital	FBO	10.2271	2.6651	Combination
Benin	Borgou	Ina Centre Communal de Santé	Community Health Centre	Public	9.9614	2.7879	GPS
Benin	Borgou	Kalale Centre de Santé de Sous-Prefecture	Centre de Santé de Sous-Prefecture	Public	10.2914	3.3818	GPS
Benin	Borgou	Kassouala Centre de santé	Health Centre	Public	8.8908	2.5897	Combination
Benin	Borgou	Kidaroukperou Centre de Santé d’Arrondissement	Centre de Santé d’Arrondissement	Public	10.251	3.3	Encarta
Benin	Borgou	Kika Centre de Santé d’Arrondissement	Centre de Santé d’Arrondissement	Public	9.283	2.783	Encarta
Benin	Borgou	Kokabo Centre de santé	Health Centre	Public	10.1333	2.489	GPS
Benin	Borgou	Kossia Centre de Santé d’Arrondissement	Centre de Santé d’Arrondissement	Public	10.2829	2.4432	Geonames
Benin	Borgou	Kourel Centre de santé	Health Centre	Public	10.3514	3.1032	Combination
Benin	Borgou	Kpari Centre de santé	Health Centre	Public	9.2784	2.8989	Geonames
Benin	Borgou	Kpebie Centre Communal de Santé	Community Health Centre	Public	9.3413	2.615	GPS
Benin	Borgou	Kpebie Centre de Santé d’Arrondissement	Centre de Santé d’Arrondissement	Public	9.6915	2.9933	GPS
Benin	Borgou	Lou Centre de santé	Health Centre	Public	10.3281	3.4596	Geonames
Benin	Borgou	Madina Centre Communal de Santé	Community Health Centre	Public	9.3361	2.6221	GPS
Benin	Borgou	Maison de La Joie (CNR) Centre Medical	Centre Médical	FBO	9.8015	2.9936	Combination
Benin	Borgou	Maregourou Centre de Santé d’Arrondissement	Centre de Santé d’Arrondissement	Public	9.8048	2.4396	Geonames
Benin	Borgou	Nassy Centre de santé	Health Centre	Public	9.618	2.984	Encarta
Benin	Borgou	Ndali Centre de Santé de Sous-Prefecture	Centre de Santé de Sous-Prefecture	Public	9.8583	2.7141	GPS
Benin	Borgou	Neganzi Centre de santé	Health Centre	Public	10.5928	3.8096	Geonames
Benin	Borgou	Nikki Centre Communal de Santé	Community Health Centre	Public	9.9534	3.156	Geonames
Benin	Borgou	Nikki Centre de Santé de Sous-Prefecture	Centre de Santé de Sous-Prefecture	Public	9.935	3.2103	GPS
Benin	Borgou	Ouenou Centre Communal de Santé	Community Health Centre	Public	9.7888	2.6353	GPS
Benin	Borgou	Paneguea Centre de santé	Health Centre	Public	9.7956	2.9925	Combination
Benin	Borgou	Papane Hôpital	Hôpital	FBO	8.7994	2.6086	GPS
Benin	Borgou	Parakou Centre Communal de Santé	Community Health Centre	Public	9.341	2.6297	GPS
Benin	Borgou	Peonga Centre de Santé d’Arrondissement	Centre de Santé d’Arrondissement	Public	10.3386	3.2625	Geonames
Benin	Borgou	Perere Centre de Santé de Sous-Prefecture	Centre de Santé de Sous-Prefecture	Public	9.8021	2.988	GPS
Benin	Borgou	Sainte Marie Hôpital	Hôpital	FBO	10.3431	2.3814	Combination
Benin	Borgou	Sakabansi Dispensaire	Dispensaire	Public	10.0402	3.3826	GPS
Benin	Borgou	Sandilo Centre de santé	Health Centre	Public	9.5237	3.1496	Geonames
Benin	Borgou	Sanson Centre de Santé d’Arrondissement	Centre de Santé d’Arrondissement	Public	9.2754	2.4252	Geonames
Benin	Borgou	Sekere Centre Communal de Santé	Community Health Centre	Public	10.4487	2.4523	GPS
Benin	Borgou	Serekali Centre de Santé d’Arrondissement	Centre de Santé d’Arrondissement	Public	9.9193	3.0424	Geonames
Benin	Borgou	Sikki Centre Communal de Santé	Community Health Centre	Public	10.1753	2.3871	GPS
Benin	Borgou	Sinende Centre de Santé de Sous-Prefecture	Centre de Santé de Sous-Prefecture	Public	10.3456	2.3779	GPS
Benin	Borgou	Sirarou Centre Communal de Santé	Community Health Centre	Public	9.6025	2.6367	GPS
Benin	Borgou	Soeurs Albertine Dispensaire	Dispensaire	FBO	9.7984	2.9907	Combination
Benin	Borgou	Sokka Centre de santé	Health Centre	Public	10.017	2.55	Encarta
Benin	Borgou	Sonsore Centre de santé	Health Centre	Public	9.899	2.865	Geonames
Benin	Borgou	Sontou Centre de Santé d’Arrondissement	Centre de Santé d’Arrondissement	Public	9.7207	2.8425	Geonames
Benin	Borgou	Soubo Centre de Santé d’Arrondissement	Centre de Santé d’Arrondissement	Public	10.0682	2.8263	Geonames
Benin	Borgou	Sounon Sero Nikki Hôpital	Hôpital	FBO	9.9338	3.2136	GPS
Benin	Borgou	Suya Centre de Santé d’Arrondissement	Centre de Santé d’Arrondissement	Public	9.855	3.0933	Geonames
Benin	Borgou	Tandou Centre de santé	Health Centre	Public	9.0942	2.8869	Geonames
Benin	Borgou	Tasso Centre Communal de Santé	Community Health Centre	Public	9.6746	3.232	GPS
Benin	Borgou	Tchaourou Centre de Santé de Sous-Prefecture	Centre de Santé de Sous-Prefecture	Public	8.8797	2.5988	GPS
Benin	Borgou	Tchatchou Centre Communal de Santé	Community Health Centre	Public	9.127	2.555	GPS
Benin	Borgou	Tchikandou Centre Communal de Santé	Community Health Centre	Public	9.8423	3.3639	GPS
Benin	Borgou	Tebo Centre de santé	Health Centre	Public	9.9861	2.8457	Google Earth
Benin	Borgou	Teme Centre de santé	Health Centre	Public	9.8962	2.4708	Geonames
Benin	Borgou	Tontarou Centre de santé	Health Centre	Public	9.8	3.234	Encarta
Benin	Borgou	Tourou Centre de Santé d’Arrondissement	Centre de Santé d’Arrondissement	Public	9.3448	2.5476	Geonames
Benin	Borgou	Wari Maro Centre de Santé d’Arrondissement	Centre de Santé d’Arrondissement	Public	9.1648	2.1526	Geonames
Benin	Borgou	Woria Centre de santé	Health Centre	Public	9.068	2.734	Geonames
Benin	Borgou	Yarra Dispensaire	Dispensaire	Public	10.506	2.4735	GPS
Benin	Borgou	Yebessi Centre de Santé	Health Centre	Public	9.3347	2.2743	Geonames
Benin	Borgou	Zambara Centre de santé	Health Centre	Public	10.4659	3.5301	Geonames
Benin	Borgou	Zongo II Centre Communal de Santé	Community Health Centre	Public	9.3642	2.6282	GPS
Benin	Collines	Adjanoudoho Centre de Santé d’Arrondissement	Centre de Santé d’Arrondissement	Public	7.7594	2.1862	Combination
Benin	Collines	Adourekonan Centre de santé	Health Centre	Public	7.9753	2.2456	Combination
Benin	Collines	Agbogbome Centre de santé	Health Centre	Public	7.7627	2.1833	Combination
Benin	Collines	Agoua Centre de Santé d’Arrondissement	Centre de Santé d’Arrondissement	Public	8.2939	1.959	GPS
Benin	Collines	Aklampa Centre de Santé d’Arrondissement	Centre de Santé d’Arrondissement	Public	8.2076	2.1872	GPS
Benin	Collines	Akpassi Centre de Santé d’Arrondissement	Centre de Santé d’Arrondissement	Public	8.4423	1.8842	Geonames
Benin	Collines	Akpero Centre de santé	Health Centre	Public	8.4839	2.4404	Encarta
Benin	Collines	Alafia Centre de santé	Health Centre	Public	8.2031	2.6302	Geonames
Benin	Collines	AsSanté Centre de Santé d’Arrondissement	Centre de Santé d’Arrondissement	Public	8.1492	2.2486	Geonames
Benin	Collines	Atchakpa Centre de Santé d’Arrondissement	Centre de Santé d’Arrondissement	Public	8.0103	2.40095	GPS
Benin	Collines	Bante Centre Communal de Santé	Community Health Centre	Public	8.4065	1.9	GPS
Benin	Collines	Besse Centre de santé	Health Centre	Public	7.7726	2.4649	Geonames
Benin	Collines	Betecoucou Centre de santé	Health Centre	Public	7.7507	2.1824	Combination
Benin	Collines	Bobe Centre de santé	Health Centre	Public	8.4257	1.9873	Geonames
Benin	Collines	Challa-Ogoi Centre de Santé d’Arrondissement	Centre de Santé d’Arrondissement	Public	8.4	2.583	Encarta
Benin	Collines	Dani Centre de santé	Health Centre	Public	8.0342	2.4866	Combination
Benin	Collines	Dassa Centre Communal de Santé	Community Health Centre	FBO	7.7789	2.1998	GPS
Benin	Collines	Dassa Hôpital de Zone	Hôpital de Zone	Public	7.7801	2.2002	GPS
Benin	Collines	Djaloukou Centre de Santé d’Arrondissement	Centre de Santé d’Arrondissement	Public	7.7401	1.7737	Geonames
Benin	Collines	Djegbe Centre de Santé d’Arrondissement	Centre de Santé d’Arrondissement	Public	8.284	2.382	Encarta
Benin	Collines	Doissa Centre de santé	Health Centre	Public	8.0019	1.9827	Geonames
Benin	Collines	Doume Centre de Santé d’Arrondissement	Centre de Santé d’Arrondissement	Public	8.018	1.6455	GPS
Benin	Collines	Fita Centre de Santé d’Arrondissement	Centre de Santé d’Arrondissement	Public	7.7572	2.1833	Combination
Benin	Collines	Gbaffo Centre de Santé d’Arrondissement	Centre de Santé d’Arrondissement	Public	7.7544	2.1848	Combination
Benin	Collines	Gbanlin Centre de Santé d’Arrondissement	Centre de Santé d’Arrondissement	Public	8.497	2.3751	GPS
Benin	Collines	Glazoue Centre Communal de Santé	Community Health Centre	Public	7.9724	2.2411	GPS
Benin	Collines	Gnokpingnon Centre de santé	Health Centre	Public	7.749	2.1842	Combination
Benin	Collines	Gobada Centre de Santé d’Arrondissement	Centre de Santé d’Arrondissement	Public	7.7699	2.0022	Geonames
Benin	Collines	Gome Centre de Santé d’Arrondissement	Centre de Santé d’Arrondissement	Public	7.9566	2.2974	Combination
Benin	Collines	Gouka Centre de Santé d’Arrondissement	Centre de Santé d’Arrondissement	Public	8.1351	1.9653	GPS
Benin	Collines	Hoco Centre de santé	Health Centre	Public	8.066	2.266	Encarta
Benin	Collines	Idadjo Centre de santé	Health Centre	Public	8.4864	2.4287	Combination
Benin	Collines	Kaboua Centre de Santé d’Arrondissement	Centre de Santé d’Arrondissement	Public	8.2446	2.6884	Geonames
Benin	Collines	Kemon Centre de Santé d’Arrondissement	Centre de Santé d’Arrondissement	Public	8.5883	2.5564	GPS
Benin	Collines	Kere Centre de Santé d’Arrondissement	Centre de Santé d’Arrondissement	Public	7.7572	2.1872	Combination
Benin	Collines	Kilibo Centre de Santé d’Arrondissement	Centre de Santé d’Arrondissement	Public	8.5733	2.5953	GPS
Benin	Collines	Koko Centre de Santé d’Arrondissement	Centre de Santé d’Arrondissement	Public	8.3792	1.8411	Geonames
Benin	Collines	Kokoro Centre de Santé d’Arrondissement	Centre de Santé d’Arrondissement	Public	8.4017	2.6151	Geonames
Benin	Collines	Kpakpa Agbagou Centre de santé	Health Centre	Public	7.7856	2.2026	Combination
Benin	Collines	Kpakpaza Centre de Santé d’Arrondissement	Centre de Santé d’Arrondissement	Public	8.1711	2.2315	Combination
Benin	Collines	Kpataba Centre de Santé d’Arrondissement	Centre de Santé d’Arrondissement	Public	8.05588	1.9804	GPS
Benin	Collines	Kpingni Centre de Santé d’Arrondissement	Centre de Santé d’Arrondissement	Public	7.75	2.1833	Combination
Benin	Collines	Lahotan Centre de Santé d’Arrondissement	Centre de Santé d’Arrondissement	Public	7.9997	2.0773	GPS
Benin	Collines	Laminou Centre de santé	Health Centre	Public	8.4933	2.4169	Combination
Benin	Collines	Lema Centre de Santé d’Arrondissement	Centre de Santé d’Arrondissement	Public	7.7704	2.1943	Combination
Benin	Collines	Logozohe Centre de Santé d’Arrondissement	Centre de Santé d’Arrondissement	Public	7.932	1.9761	Combination
Benin	Collines	Lougba Centre de Santé d’Arrondissement	Centre de Santé d’Arrondissement	Public	8.38	1.7855	Geonames
Benin	Collines	Magoumi Centre de Santé d’Arrondissement	Centre de Santé d’Arrondissement	Public	8.0052	2.2044	GPS
Benin	Collines	Miniffi Centre de Santé d’Arrondissement	Centre de Santé d’Arrondissement	Public	7.7686	2.1987	Combination
Benin	Collines	Monka Centre de santé	Health Centre	Public	8.016	2.696	Encarta
Benin	Collines	Monkpa Centre de Santé d’Arrondissement	Centre de Santé d’Arrondissement	Public	7.9289	1.9794	Combination
Benin	Collines	Odougba Centre de Santé d’Arrondissement	Centre de Santé d’Arrondissement	Public	8.4999	2.4299	Combination
Benin	Collines	Offe Centre de santé	Health Centre	Public	8.0389	2.493	Combination
Benin	Collines	Oke-Owo Centre de Santé d’Arrondissement	Centre de Santé d’Arrondissement	Public	8.0498	2.7119	GPS
Benin	Collines	Okounfo Centre de Santé d’Arrondissement	Centre de Santé d’Arrondissement	Public	8.3165	2.626	Geonames
Benin	Collines	Okpa Centre de santé	Health Centre	Public	8.484	2.415	Encarta
Benin	Collines	Ottola Centre de Santé d’Arrondissement	Centre de Santé d’Arrondissement	Public	8.1537	1.6577	GPS
Benin	Collines	Ouedeme Centre de Santé d’Arrondissement	Centre de Santé d’Arrondissement	Public	7.9548	2.2976	Combination
Benin	Collines	Ouesse Centre de Santé	Health Centre	Public	8.4888	2.4345	GPS
Benin	Collines	Ouesse Centre de Santé d’Arrondissement	Centre de Santé d’Arrondissement	Public	7.933	1.966	Encarta
Benin	Collines	Ouoghi Centre de santé	Health Centre	Public	8.0293	2.496	Combination
Benin	Collines	Paouignan Centre de Santé d’Arrondissement	Centre de Santé d’Arrondissement	Public	7.6782	2.2247	GPS
Benin	Collines	Pira Centre de Santé d’Arrondissement	Centre de Santé d’Arrondissement	Public	8.4914	1.7364	GPS
Benin	Collines	Plateau Centre de Santé d’Arrondissement	Centre de Santé d’Arrondissement	Public	8.0323	2.4827	GPS
Benin	Collines	Riffo Centre de santé	Health Centre	Public	7.9804	2.2554	Combination
Benin	Collines	Sakin Centre de santé	Health Centre	Public	8.0318	2.4786	Combination
Benin	Collines	Savalou Centre de Santé d’Arrondissement	Centre de Santé d’Arrondissement	Public	7.9273	1.98	GPS
Benin	Collines	Savalou Hôpital de Zone	Hôpital de Zone	Public	7.9271	1.9811	GPS
Benin	Collines	Save Hôpital de Zone	Hôpital de Zone	Public	8.0543	2.507	GPS
Benin	Collines	Soclogbo Centre de Santé d’Arrondissement	Centre de Santé d’Arrondissement	Public	7.682	2.25	Encarta
Benin	Collines	Sokponta Centre de Santé d’Arrondissement	Centre de Santé d’Arrondissement	Public	7.8689	2.2356	Geonames
Benin	Collines	Sowe Centre de santé	Health Centre	Public	7.9677	2.2436	Combination
Benin	Collines	Sowiandji Centre de Santé d’Arrondissement	Centre de Santé d’Arrondissement	Public	7.9666	2.2391	Combination
Benin	Collines	Tchatchegou Centre de Santé d’Arrondissement	Centre de Santé d’Arrondissement	Public	7.9714	2.2429	Combination
Benin	Collines	Tchetti Centre de Santé d’Arrondissement	Centre de Santé d’Arrondissement	Public	7.8277	1.6637	GPS
Benin	Collines	Thio Centre de Santé d’Arrondissement	Centre de Santé d’Arrondissement	Public	7.9868	2.2938	GPS
Benin	Collines	Toui Centre de Santé d’Arrondissement	Centre de Santé d’Arrondissement	Public	8.6853	2.5935	GPS
Benin	Collines	Tre Centre de Santé d’Arrondissement	Centre de Santé d’Arrondissement	Public	7.7483	2.1854	Combination
Benin	Collines	Vossa Centre de Santé d’Arrondissement	Centre de Santé d’Arrondissement	Public	8.499	2.35	Encarta
Benin	Collines	Yagbo Centre de santé	Health Centre	Public	8.0846	2.1363	Google Earth
Benin	Collines	Yaoui Centre de santé	Health Centre	Public	8.4951	2.4241	Combination
Benin	Collines	Zaffe Centre Communal de Santé	Community Health Centre	FBO	7.9418	2.2389	GPS
Benin	Collines	Zounzonkamey Centre de Santé d’Arrondissement	Centre de Santé d’Arrondissement	Public	7.9305	1.9899	Combination
Benin	Couffo	Adjahonme Centre de Santé d’Arrondissement	Centre de Santé d’Arrondissement	Public	7.0464	1.8031	GPS
Benin	Couffo	Adjido Centre de Santé d’Arrondissement	Centre de Santé d’Arrondissement	Public	6.924	1.767	Combination
Benin	Couffo	Adjintimey Centre de Santé d’Arrondissement	Centre de Santé d’Arrondissement	Public	6.83307	1.67939	GPS
Benin	Couffo	Adoukandji Centre de Santé d’Arrondissement	Centre de Santé d’Arrondissement	Public	6.9263	1.8879	Combination
Benin	Couffo	Aflantan Centre Medical	Centre Médical	Public	6.9397	1.6746	Combination
Benin	Couffo	Ahogbeya Centre de Santé d’Arrondissement	Centre de Santé d’Arrondissement	Public	7.0301	1.9215	Geonames
Benin	Couffo	Ahouada Centre de santé	Health Centre	Public	6.928	1.8901	Combination
Benin	Couffo	Akime Centre de Santé	Health Centre	Public	7.046	1.8708	Combination
Benin	Couffo	Aplahoue Centre Communal de Santé	Community Health Centre	Public	6.9404	1.6751	GPS
Benin	Couffo	Aplahoue Hôpital de Zone	Hôpital de Zone	Public	6.942	1.6949	GPS
Benin	Couffo	Atomey Centre de Santé d’Arrondissement	Centre de Santé d’Arrondissement	Public	7.2308	1.641	GPS
Benin	Couffo	Ayomi Centre de Santé d’Arrondissement	Centre de Santé d’Arrondissement	Public	6.8331	1.6794	GPS
Benin	Couffo	Azove Centre de Santé	Health Centre	Public	6.9467	1.702	Geonames
Benin	Couffo	Banigbe Centre de Santé	Health Centre	Public	6.8854	1.9639	Combination
Benin	Couffo	Banonsi-Avedjin Centre de Santé d’Arrondissement	Centre de Santé d’Arrondissement	Public	6.916	1.8439	GPS
Benin	Couffo	Betoumey Centre de Santé d’Arrondissement	Centre de Santé d’Arrondissement	Public	6.9503	1.7281	GPS
Benin	Couffo	Catholic Klouek Dispensaire	Dispensaire	FBO	6.9803	1.8422	Geonames
Benin	Couffo	Ctal Madjre Centre Medical	Centre Médical	FBO	6.8199	1.8603	Combination
Benin	Couffo	Dekpo Centre de Santé d’Arrondissement	Centre de Santé d’Arrondissement	Public	7.0254	1.6996	GPS
Benin	Couffo	Deve Centre de Santé d’Arrondissement	Centre de Santé d’Arrondissement	Public	6.76579	1.66346	GPS
Benin	Couffo	Di Gbotohoue Centre de santé	Health Centre	Public	6.9002	1.7028	Combination
Benin	Couffo	Djakotome Centre Communal de Santé	Community Health Centre	Public	6.90226	1.7241	GPS
Benin	Couffo	Djotto Centre de Santé d’Arrondissement	Centre de Santé d’Arrondissement	Public	6.9159	1.8439	GPS
Benin	Couffo	Dogbo Centre Communal de Santé	Community Health Centre	Public	6.80713	1.78398	GPS
Benin	Couffo	Dogbo Hôpital	Hôpital	FBO	6.76575	1.66347	GPS
Benin	Couffo	Doko Centre de Santé d’Arrondissement	Centre de Santé d’Arrondissement	Public	6.8561	1.8085	GPS
Benin	Couffo	Edahoue Centre de Santé	Health Centre	Public	6.9796	1.8459	Combination
Benin	Couffo	Gbowime Centre de Santé	Health Centre	Public	6.9857	1.847	Combination
Benin	Couffo	Gnizounme Centre de Santé d’Arrondissement	Centre de Santé d’Arrondissement	Public	6.9304	1.8876	Combination
Benin	Couffo	Godohou Centre de Santé d’Arrondissement	Centre de Santé d’Arrondissement	Public	7.1074	1.7227	GPS
Benin	Couffo	Gohomey Centre Medical	Centre Médical	FBO	6.9033	1.6937	Combination
[truncated: 96,746 more rows]

## Sheet: Abbreviations
CBO	Community Based Organization
FBO	Faith Based Organization
Govt.	Government
MoH	Ministry of Health
MoHCDGEC	Ministry of Health, Community Development, Gender, Elderly and Children,
MoHL	Ministry of Health and Labour
MoHQL	Ministry of Health and Quality of Life
MoHSS	Ministry of Health and Social Services
NGO	Non Governmental Organization
ONG/non-lucratif	Non Governmental Organization
SDA	Seventh Day Adventist
